# Supplementary material
Source: MDPI journal article supplement (https://www.mdpi.com/2311-7524/8/9/842)

**Table S2.** The results of RNA detection.

| Sample ID | Concentration | Unit  | 260/280 | 260/230 | Volume (μL) | Total amount (μg) | RIN | 28S/18S value | Note   | Test result |
|-----------|---------------|-------|---------|---------|-------------|-------------------|-----|---------------|--------|-------------|
| Pc (♀)    | 53.8          | ng/μl | 2.28    | 0.53    | 25          | 1.3               | 8   | 2.04          | Normal | qualified   |
| Ph (♂)    | 82.5          | ng/μl | 2.21    | 0.97    | 25          | 2.1               | 6.9 | 1.71          | Normal | qualified   |
| F1        | 148.7         | ng/μl | 2.13    | 1.48    | 25          | 3.7               | 8.3 | 1.13          | Normal | qualified   |
| F3        | 54.6          | ng/μl | 2.14    | 1.09    | 25          | 1.4               | 8.4 | 2.29          | Normal | qualified   |
| F4        | 80.6          | ng/μl | 2.18    | 1.9     | 25          | 2                 | 8.9 | 2.27          | Normal | qualified   |
| F5        | 110.9         | ng/μl | 2.15    | 0.73    | 25          | 2.8               | 7.8 | 1.43          | Normal | qualified   |
| F6        | 62            | ng/μl | 2.12    | 1.82    | 25          | 1.6               | 8.4 | 2.13          | Normal | qualified   |
| F7        | 47.8          | ng/μl | 2.2     | 1.29    | 26          | 1.2               | 6.8 | 1.5           | Normal | qualified   |
| F8        | 128.6         | ng/μl | 2.11    | 1.72    | 25          | 3.2               | 8.2 | 1.92          | Normal | qualified   |
| F9        | 89.9          | ng/μl | 2.19    | 0.55    | 25          | 2.2               | 8.0 | 1.80          | Normal | qualified   |
| F10       | 97.5          | ng/μl | 2.14    | 1.68    | 25          | 2.4               | 7.8 | 2.32          | Normal | qualified   |
| F11       | 76.7          | ng/μl | 2.19    | 1.86    | 25          | 2.0               | 7.8 | 1.87          | Normal | qualified   |
| F12       | 42.6          | ng/μl | 2.09    | 0.89    | 25          | 1.1               | 7.4 | 1.34          | Normal | qualified   |
| F13       | 43.2          | ng/μl | 2.11    | 1.34    | 25          | 1.1               | 8.8 | 2.74          | Normal | qualified   |
| F14       | 50.1          | ng/μl | 2.14    | 0.59    | 25          | 1.3               | 8.5 | 2.25          | Normal | qualified   |
| F15       | 74.7          | ng/μl | 2.16    | 1.46    | 25          | 1.9               | 8.2 | 1.97          | Normal | qualified   |
| F16       | 42.9          | ng/μl | 2.19    | 0.5     | 25          | 1.1               | 8.3 | 2.14          | Normal | qualified   |
| F17       | 65.6          | ng/μl | 2.07    | 1.31    | 25          | 1.6               | 7.7 | 1.75          | Normal | qualified   |
| F18       | 64.4          | ng/μl | 2.18    | 0.52    | 25          | 1.6               | 8.2 | 2.21          | Normal | qualified   |
| F19       | 40.5          | ng/μl | 2.27    | 0.88    | 25          | 1                 | 8.5 | 2.27          | Normal | qualified   |
| F20       | 84.7          | ng/μl | 2.21    | 0.52    | 25          | 2.1               | 8.4 | 2.32          | Normal | qualified   |
| F21       | 71.2          | ng/μl | 2.07    | 0.83    | 25          | 1.8               | 7.6 | 1.63          | Normal | qualified   |
| F22       | 47.5          | ng/μl | 2.21    | 0.63    | 25          | 1.2               | 8.6 | 2.44          | Normal | qualified   |
| F23       | 73.5          | ng/μl | 2.17    | 0.52    | 25          | 1.8               | 7.9 | 1.65          | Normal | qualified   |
| F24       | 67.1          | ng/μl | 2.05    | 1.46    | 25          | 1.7               | 7.9 | 1.85          | Normal | qualified   |
| F25       | 48.4          | ng/μl | 2.1     | 0.88    | 25          | 1.2               | 8.1 | 2             | Normal | qualified   |
| F26       | 71            | ng/μl | 2.18    | 0.5     | 25          | 1.8               | 8.4 | 2.31          | Normal | qualified   |
| F27       | 54.9          | ng/μl | 2.19    | 1.24    | 25          | 1.4               | 8.2 | 2.13          | Normal | qualified   |
| F28       | 103.9         | ng/μl | 2.08    | 1.6     | 25          | 2.6               | 8.2 | 1.87          | Normal | qualified   |
| F29       | 49.1          | ng/μl | 2.25    | 0.86    | 25          | 1.2               | 8.6 | 2.15          | Normal | qualified   |
| F30       | 94.7          | ng/μl | 2.09    | 1.04    | 25          | 2.4               | 8.1 | 1.89          | Normal | qualified   |
| F31       | 42.2          | ng/μl | 2.26    | 1.07    | 24          | 1                 | 8.2 | 2.24          | Normal | qualified   |
| F32       | 61.5          | ng/μl | 2.24    | 0.61    | 25          | 1.5               | 7.8 | 2.2           | Normal | qualified   |
| F33       | 48.4          | ng/μl | 2.21    | 1.45    | 25          | 1.2               | 8   | 2.31          | Normal | qualified   |
| F34       | 77.4          | ng/μl | 2.11    | 1.44    | 25          | 1.9               | 8   | 1.83          | Normal | qualified   |
| F35       | 54.1          | ng/μl | 1.87    | 0.99    | 25          | 1.4               | 8   | 2.03          | Normal | qualified   |
| F36       | 89.5          | ng/μl | 2.16    | 1.07    | 25          | 2.2               | 8.5 | 1.73          | Normal | qualified   |
| F37       | 46.5          | ng/μl | 1.9     | 0.95    | 25          | 1.2               | 7.4 | 1.92          | Normal | qualified   |
| F38       | 55.2          | ng/μl | 2.21    | 1.62    | 25          | 1.4               | 7.8 | 2.07          | Normal | qualified   |
| F39       | 77.4          | ng/μl | 2.11    | 0.68    | 25          | 1.9               | 8.1 | 2.36          | Normal | qualified   |

RIN: RNA integrity number.

Table S2. Continued.

| Sample ID | Concentration | Unit  | 260/280 | 260/230 | Volume (μL) | Total amount (μg) | RIN | 28S/18S value | Note   | Test result |
|-----------|---------------|-------|---------|---------|-------------|-------------------|-----|---------------|--------|-------------|
| F40       | 112.8         | ng/μl | 2.07    | 1.22    | 25          | 2.8               | 7.8 | 2.28          | Normal | qualified   |
| F41       | 129.9         | ng/μl | 2.16    | 2.02    | 25          | 3.2               | 7.8 | 2.24          | Normal | qualified   |
| F42       | 87.5          | ng/μl | 2.12    | 1.67    | 24          | 2.1               | 8.2 | 2.48          | Normal | qualified   |
| F43       | 81.6          | ng/μl | 1.74    | 0.68    | 25          | 2.0               | 8.1 | 1.5           | Normal | qualified   |
| F44       | 40            | ng/μl | 2.12    | 1.37    | 25          | 1                 | 8.4 | 2.26          | Normal | qualified   |
| F45       | 59.3          | ng/μl | 2.15    | 1.72    | 25          | 1.5               | 8.2 | 2.28          | Normal | qualified   |
| F46       | 73.5          | ng/μl | 2.08    | 1.63    | 25          | 1.8               | 7.6 | 2.27          | Normal | qualified   |
| F47       | 50            | ng/μl | 2.04    | 1.65    | 25          | 1.2               | 8.3 | 2.31          | Normal | qualified   |
| F48       | 90.7          | ng/μl | 2.12    | 1.01    | 25          | 2.3               | 8   | 2.48          | Normal | qualified   |
| F49       | 88.9          | ng/μl | 2.12    | 1.04    | 25          | 2.2               | 7.6 | 2.54          | Normal | qualified   |
| F50       | 94.5          | ng/μl | 2.2     | 0.93    | 25          | 2.4               | 8.2 | 2.4           | Normal | qualified   |
| F51       | 95.2          | ng/μl | 2.12    | 1.75    | 24          | 2.3               | 8.2 | 2.19          | Normal | qualified   |
| F52       | 55.9          | ng/μl | 2.24    | 0.79    | 24          | 1.3               | 7.9 | 2.35          | Normal | qualified   |
| F54       | 83.5          | ng/μl | 2.13    | 1.18    | 25          | 2.1               | 7.5 | 2.18          | Normal | qualified   |
| F55       | 90.8          | ng/μl | 2.18    | 1.52    | 24          | 2.2               | 7.8 | 2.23          | Normal | qualified   |
| F56       | 45.1          | ng/μl | 2.01    | 0.72    | 25          | 1.1               | 7.8 | 2.34          | Normal | qualified   |
| F57       | 132.4         | ng/μl | 2.14    | 1.74    | 25          | 3.3               | 7.4 | 1.91          | Normal | qualified   |
| F58       | 47.4          | ng/μl | 2.07    | 0.89    | 22          | 1.0               | 8.4 | 2.3           | Normal | qualified   |
| F61       | 91.2          | ng/μl | 2.18    | 2.05    | 24          | 2.2               | 8.2 | 2.74          | Normal | qualified   |
| F62       | 68.2          | ng/μl | 2.17    | 1.75    | 24          | 1.6               | 8.4 | 2.57          | Normal | qualified   |
| F63       | 51.2          | ng/μl | 1.93    | 0.73    | 22          | 1.1               | 7.7 | 2.33          | Normal | qualified   |
| F64       | 42.4          | ng/μl | 2.06    | 1.33    | 22          | 0.9               | 7.9 | 2.19          | Normal | qualified   |
| F65       | 79.3          | ng/μl | 2.16    | 0.74    | 22          | 1.7               | 7.5 | 1.8           | Normal | qualified   |
| F66       | 72.4          | ng/μl | 2.15    | 1.18    | 25          | 1.8               | 6.9 | 3.5           | Normal | qualified   |
| F67       | 72.6          | ng/μl | 2.16    | 1.37    | 24          | 1.7               | 8.1 | 2.29          | Normal | qualified   |
| F68       | 65            | ng/μl | 1.93    | 1.29    | 24          | 1.6               | 8.1 | 1.56          | Normal | qualified   |
| F69       | 116.8         | ng/μl | 2.12    | 1.01    | 22          | 2.6               | 7.9 | 2.1           | Normal | qualified   |
| F70       | 54.9          | ng/μl | 2.07    | 1.02    | 22          | 1.2               | 8   | 1.86          | Normal | qualified   |
| F71       | 99.6          | ng/μl | 2.05    | 1.35    | 22          | 2.2               | 8.2 | 1.95          | Normal | qualified   |
| F72       | 98.8          | ng/μl | 2.26    | 0.98    | 24          | 2.4               | 8   | 2.36          | Normal | qualified   |
| F73       | 99.4          | ng/μl | 2.2     | 1.38    | 24          | 2.4               | 8.2 | 2.43          | Normal | qualified   |
| F74       | 40.5          | ng/μl | 2.24    | 1.35    | 24          | 1.0               | 8   | 2.58          | Normal | qualified   |
| F75       | 52.6          | ng/μl | 2.28    | 1.24    | 24          | 1.3               | 8.2 | 2.32          | Normal | qualified   |
| F77       | 51.3          | ng/μl | 2.25    | 1.14    | 24          | 1.2               | 8.3 | 2.64          | Normal | qualified   |
| F78       | 40.0          | ng/μl | 1.89    | 0.32    | 25          | 0.9               | 8.2 | 2.02          | Normal | qualified   |
| F79       | 59.4          | ng/μl | 2.01    | 1.29    | 25          | 1.5               | 8.5 | 1.87          | Normal | qualified   |
| F80       | 65.9          | ng/μl | 2.23    | 2.15    | 24          | 1.6               | 7.8 | 2.94          | Normal | qualified   |
| F81       | 49.5          | ng/μl | 2.19    | 1.45    | 24          | 1.2               | 8.3 | 2.49          | Normal | qualified   |
| F82       | 41.2          | ng/μl | 2.16    | 0.50    | 11          | 0.5               | 8.2 | 1.93          | Normal | qualified   |
| F83       | 52.8          | ng/μl | 2.01    | 0.87    | 25          | 1.3               | 8.4 | 1.83          | Normal | qualified   |

Table S2. Continued.

| Sample ID | Concentration | Unit  | 260/280 | 260/230 | Volume (μL) | Total amount (μg) | RIN | 28S/18S value | Note   | Test result |
|-----------|---------------|-------|---------|---------|-------------|-------------------|-----|---------------|--------|-------------|
| F84       | 43.5          | ng/μl | 1.96    | 0.57    | 25          | 1.1               | 8.1 | 1.65          | Normal | qualified   |
| F85       | 48.8          | ng/μl | 2.05    | 0.57    | 25          | 1.2               | 8   | 1.77          | Normal | qualified   |
| F86       | 160.3         | ng/μl | 2.11    | 1.53    | 25          | 4.0               | 7.8 | 1.88          | Normal | qualified   |
| F87       | 80.8          | ng/μl | 2.13    | 0.5     | 25          | 2.0               | 8   | 1.63          | Normal | qualified   |
| F88       | 68.3          | ng/μl | 2.13    | 1.06    | 11          | 0.8               | 8.1 | 1.85          | Normal | qualified   |
| F89       | 46.3          | ng/μl | 1.87    | 0.86    | 25          | 1.2               | 7.7 | 1.95          | Normal | qualified   |
| F90       | 43.3          | ng/μl | 2.15    | 1.27    | 11          | 0.5               | 8.5 | 2.06          | Normal | qualified   |
| F91       | 73.2          | ng/μl | 2.17    | 0.68    | 25          | 1.8               | 8.5 | 2.13          | Normal | qualified   |
| F92       | 49.6          | ng/μl | 2.01    | 0.91    | 25          | 1.2               | 8.2 | 1.93          | Normal | qualified   |
| F93       | 63.7          | ng/μl | 2.04    | 1.53    | 25          | 1.6               | 8.2 | 1.99          | Normal | qualified   |
| F94       | 58.8          | ng/μl | 1.96    | 0.84    | 25          | 1.5               | 8.3 | 2.17          | Normal | qualified   |
| F95       | 49            | ng/μl | 2.04    | 0.96    | 25          | 1.2               | 7.7 | 1.8           | Normal | qualified   |
| F96       | 60.2          | ng/μl | 2.05    | 0.5     | 25          | 1.5               | 7.7 | 2.07          | Normal | qualified   |
| F97       | 51.9          | ng/μl | 2.05    | 0.64    | 25          | 1.3               | 7.5 | 1.82          | Normal | qualified   |
| F98       | 46.3          | ng/μl | 2.09    | 0.54    | 25          | 1.2               | 7.9 | 2.1           | Normal | qualified   |
| F99       | 63.9          | ng/μl | 2.11    | 1.81    | 25          | 1.6               | 7.3 | 2.11          | Normal | qualified   |
| F100      | 56.7          | ng/μl | 2.13    | 1.28    | 8           | 0.5               | 8.2 | 1.88          | Normal | qualified   |

**Table S2. Continued.**  
Agilent 2100 Bioanalyzer results.  
Pc ( ♀ )

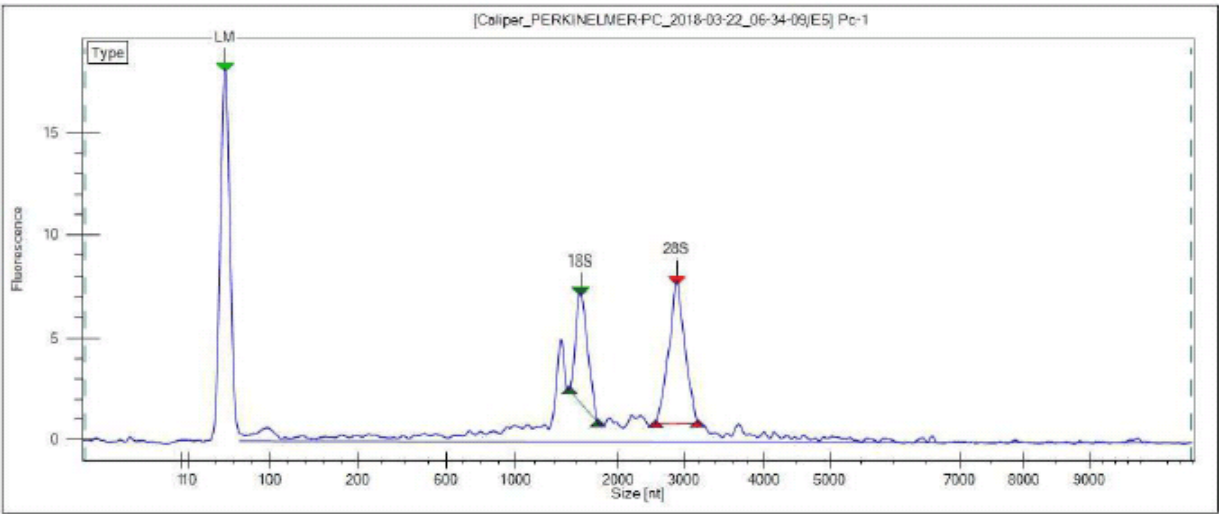

Ph ( ♂ )

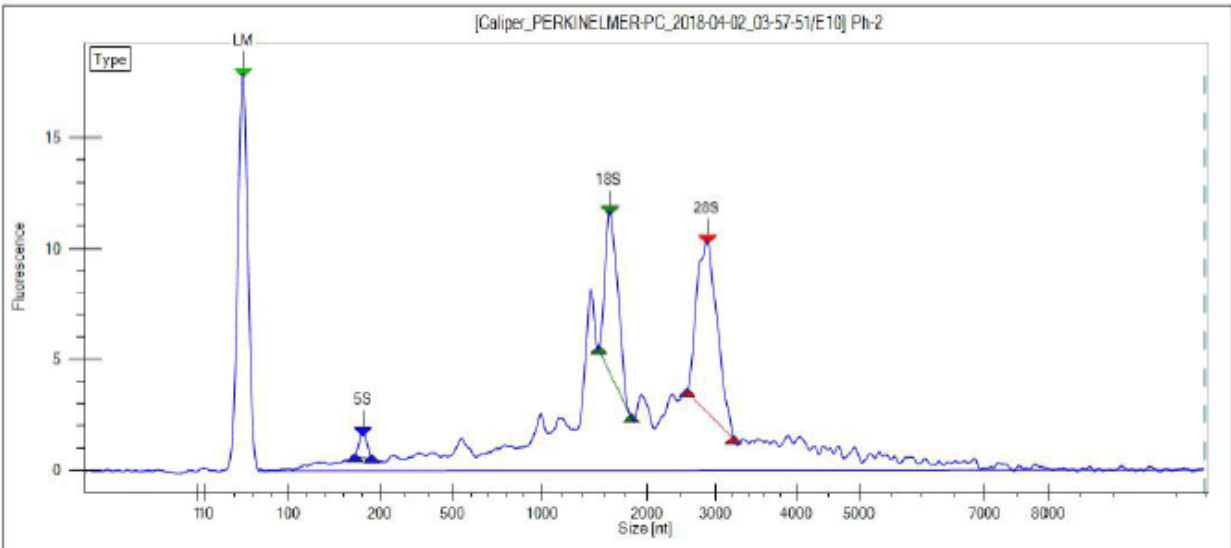

F1

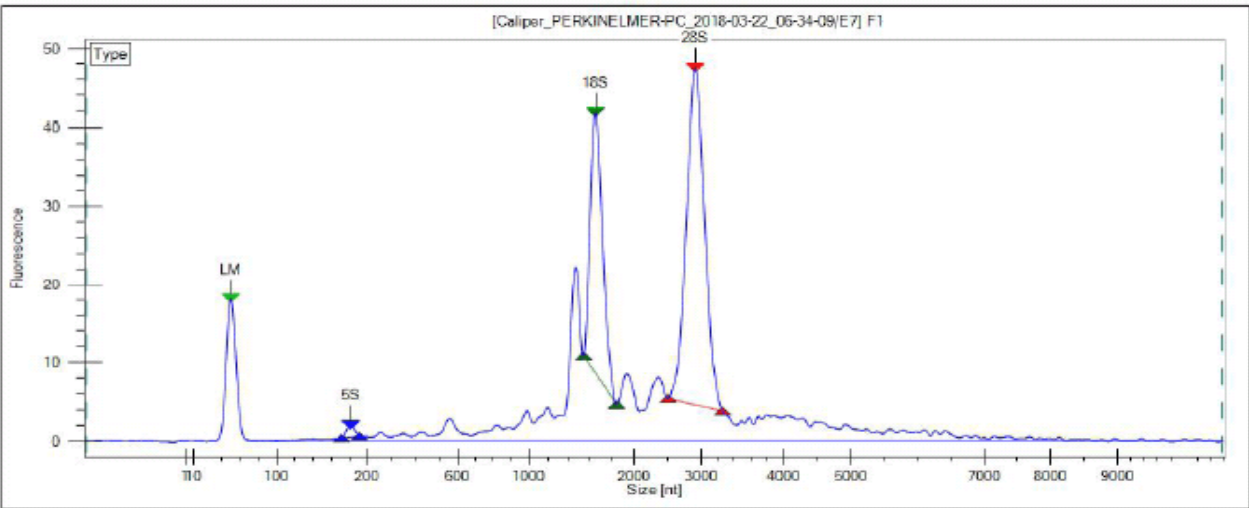

F3

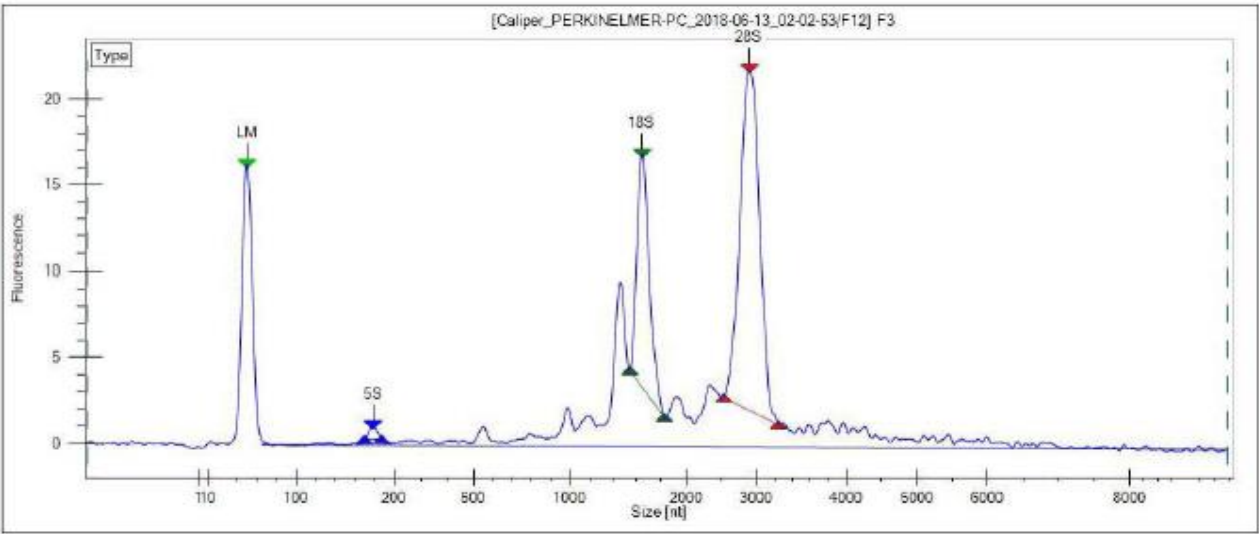

F4

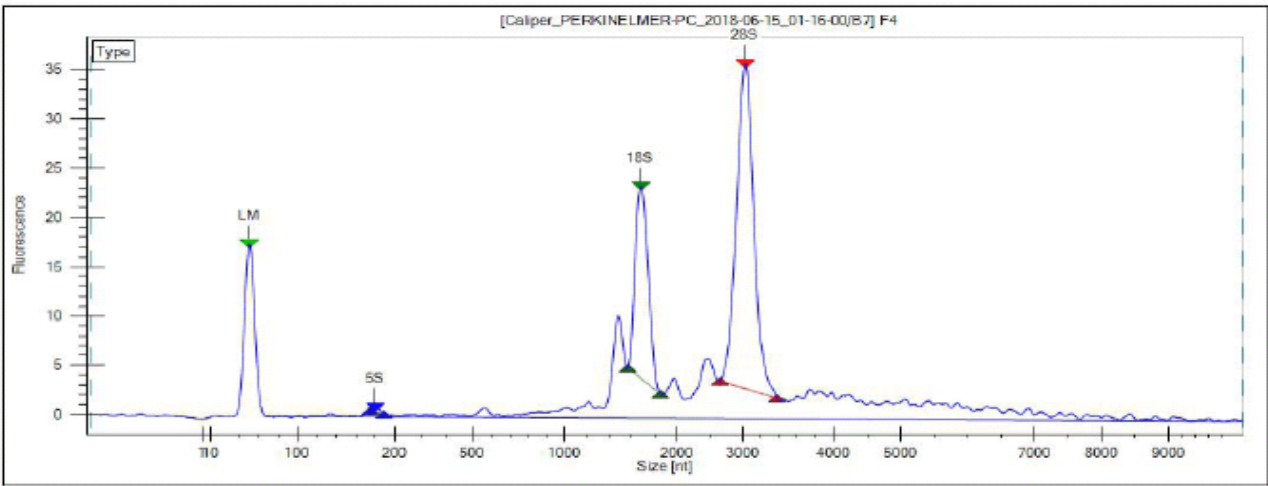

F5

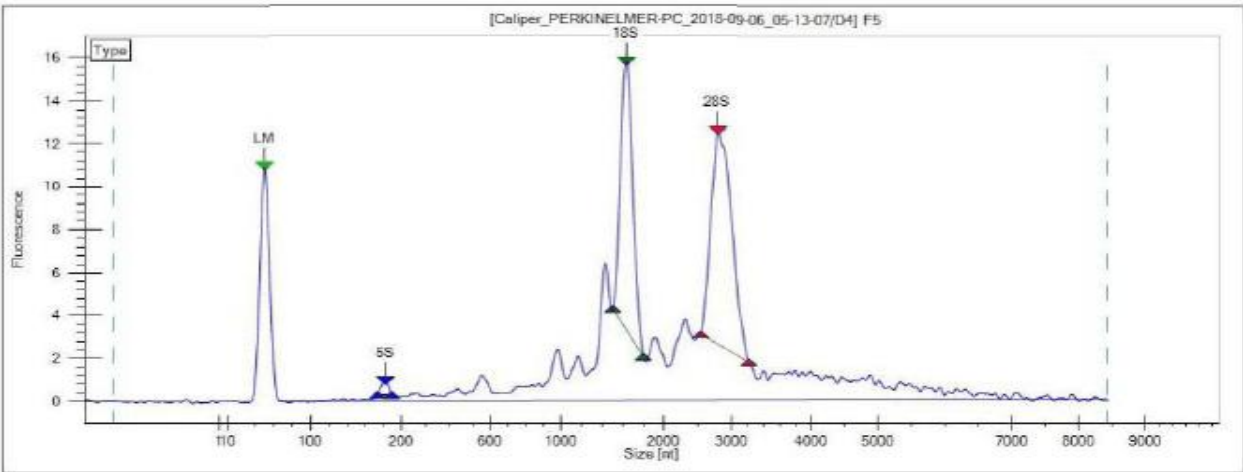

F6

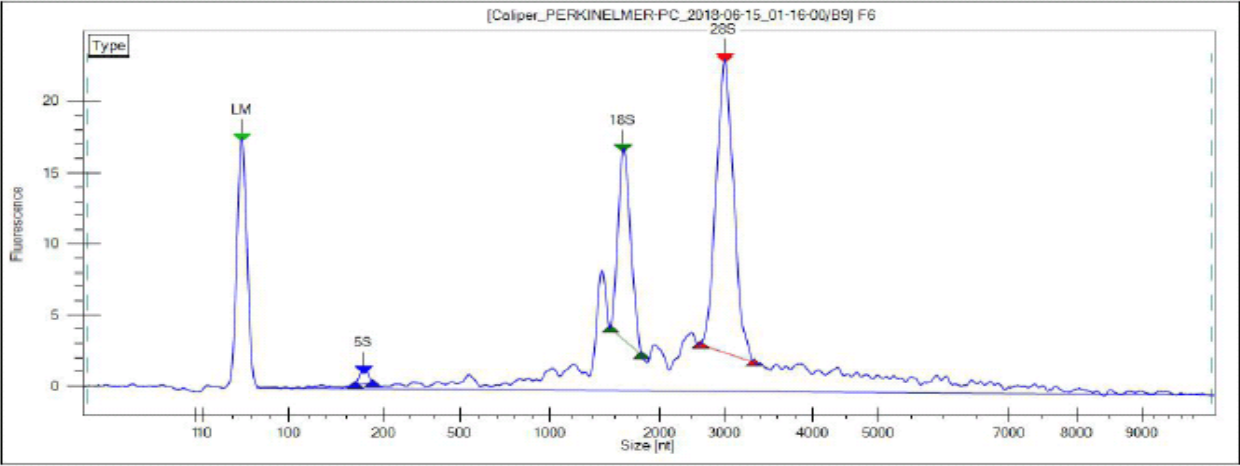

F7

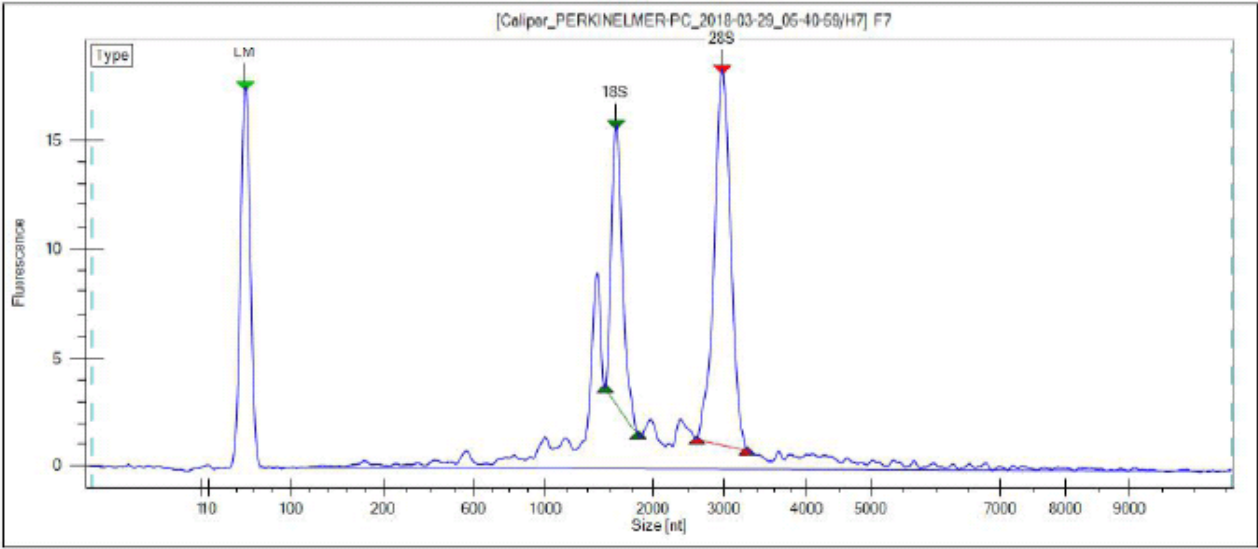

F8

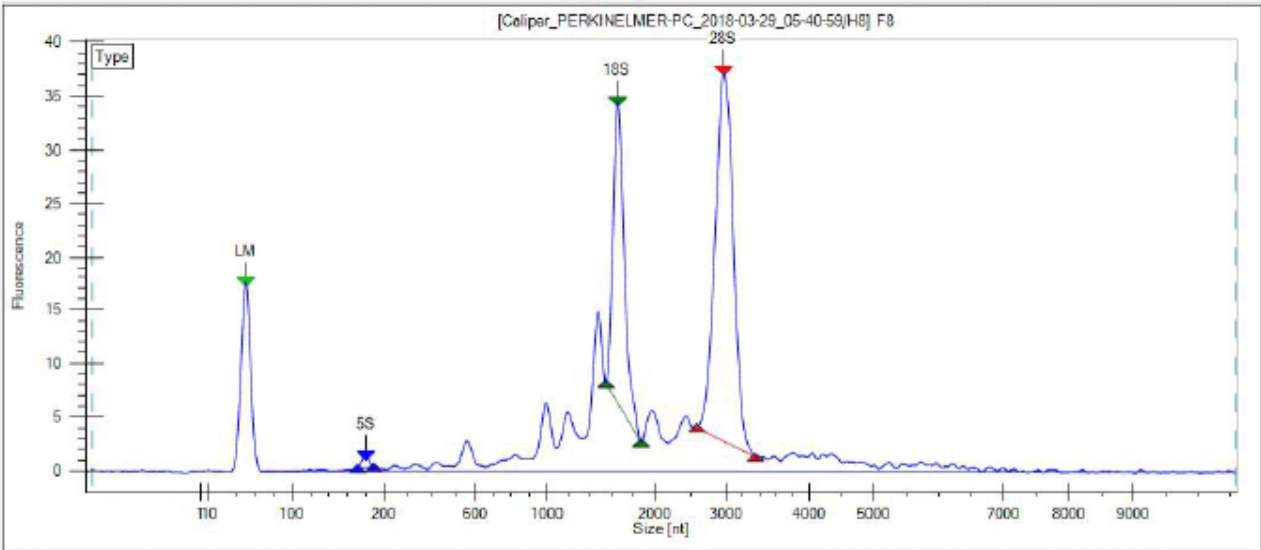



F9

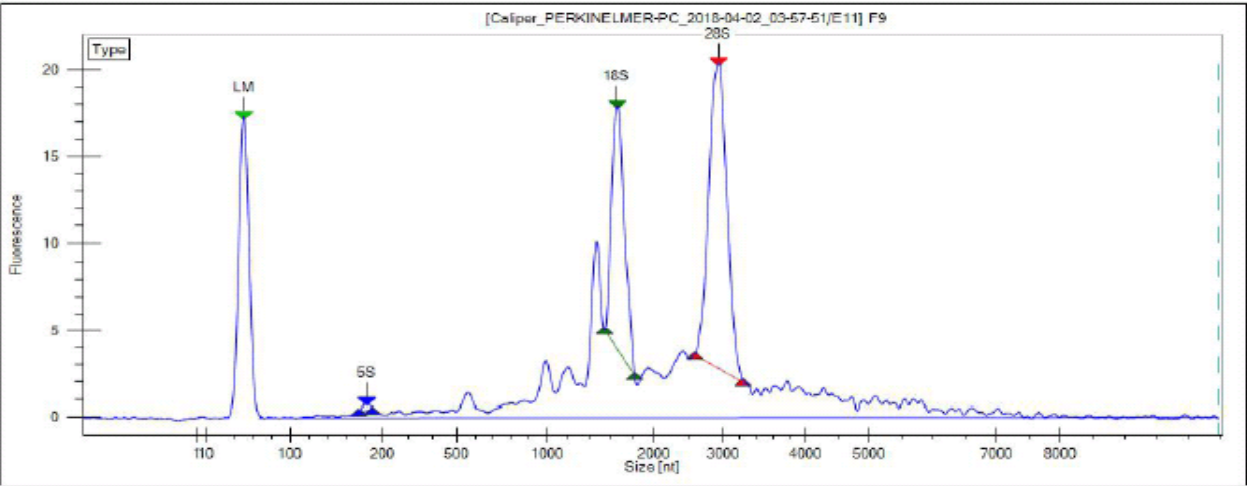

F10

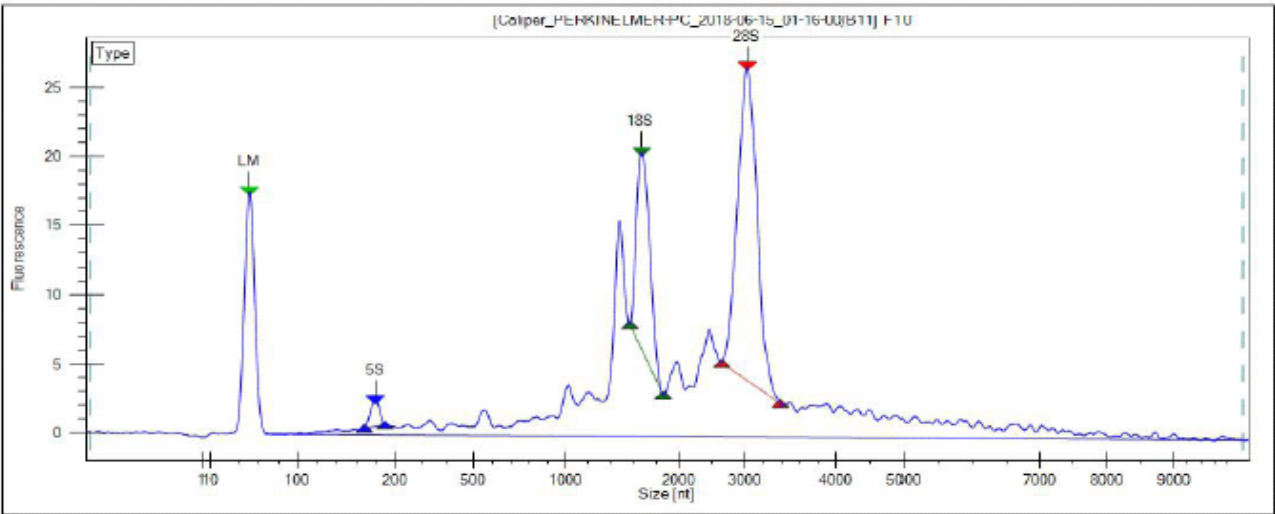

F11

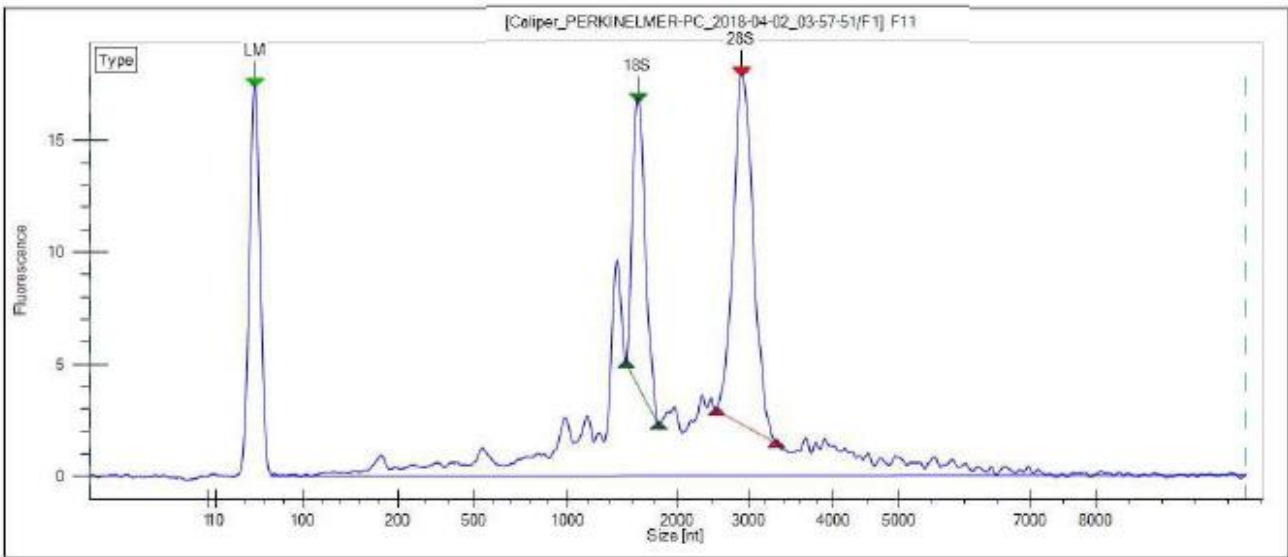

F12

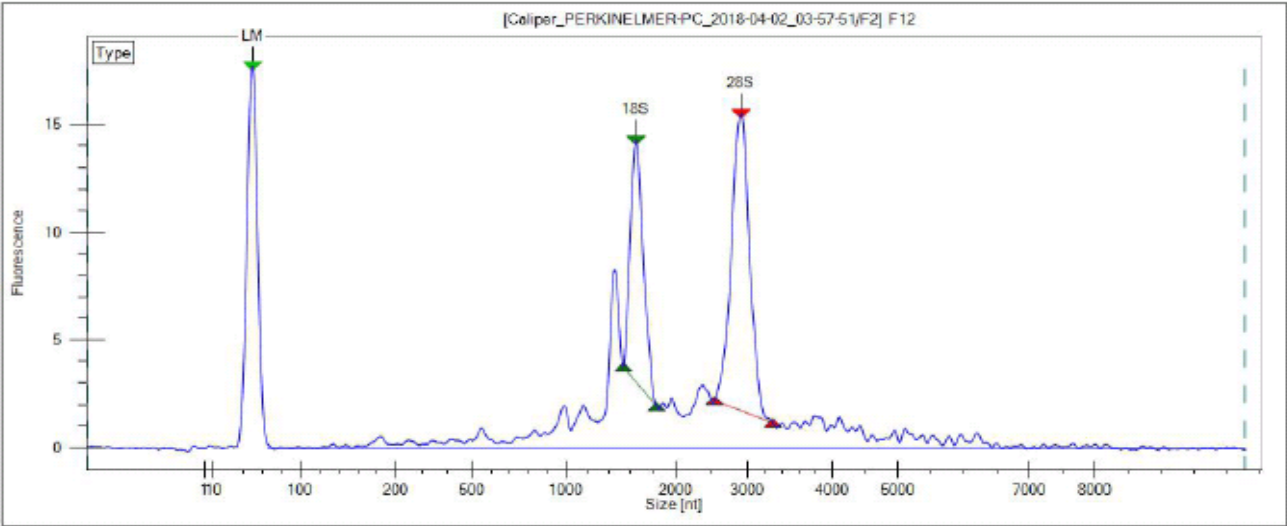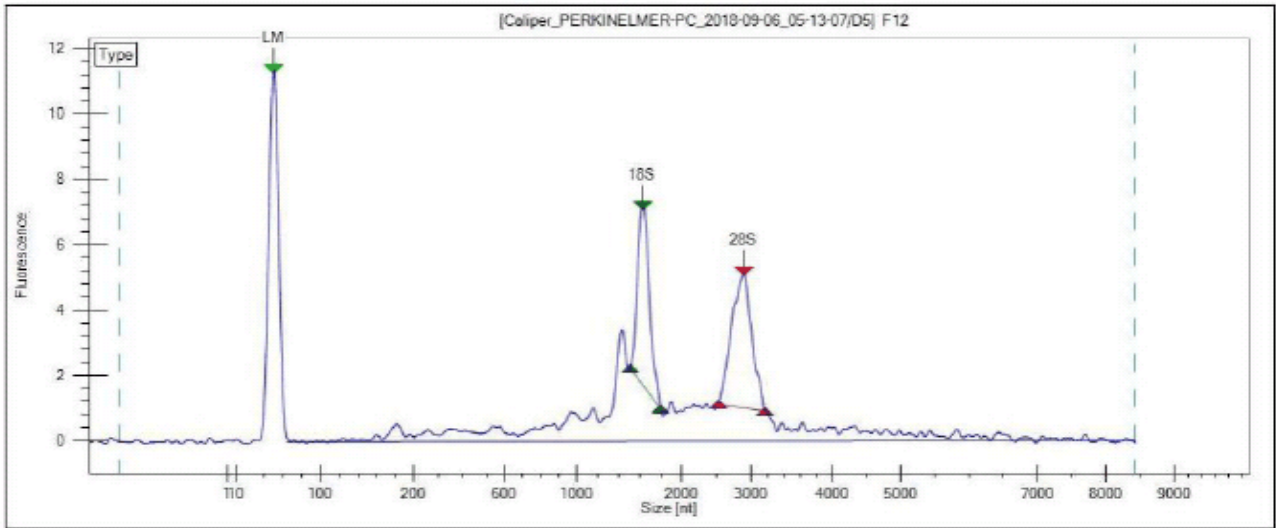

F13

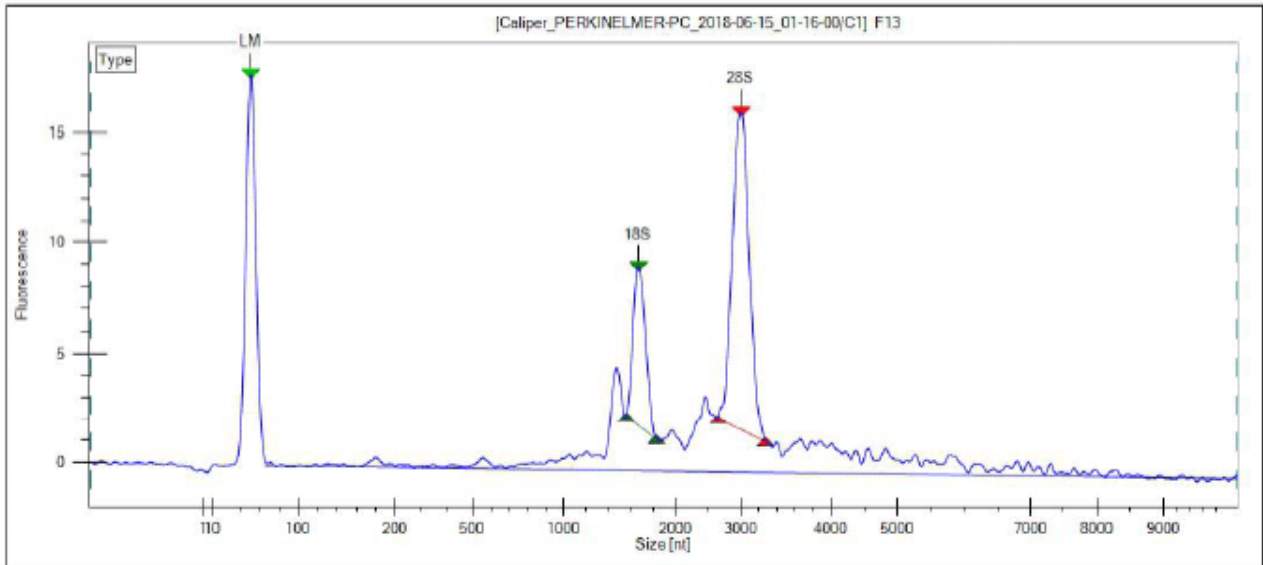



F14

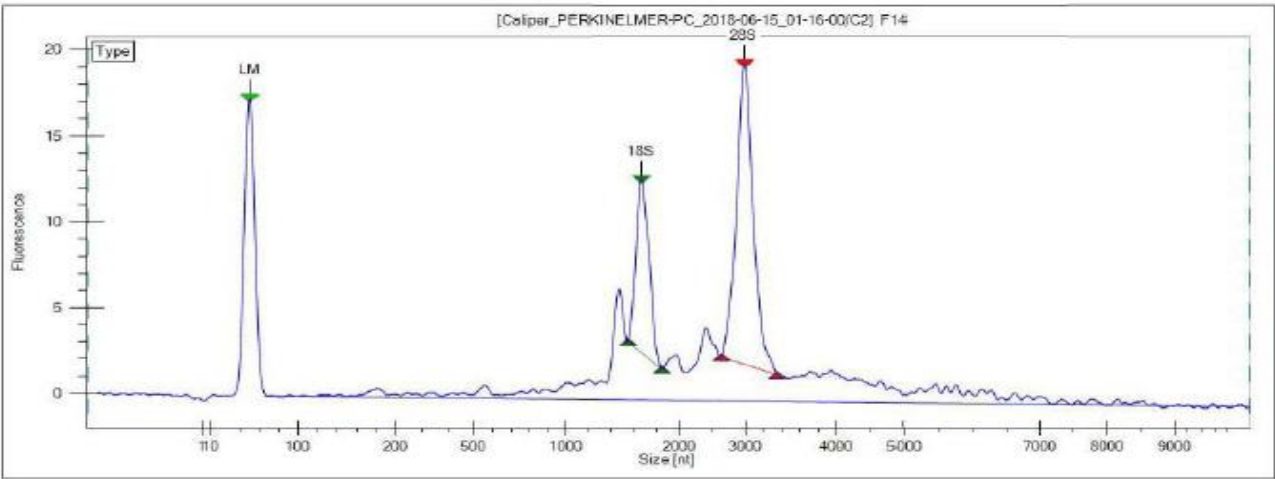

F15

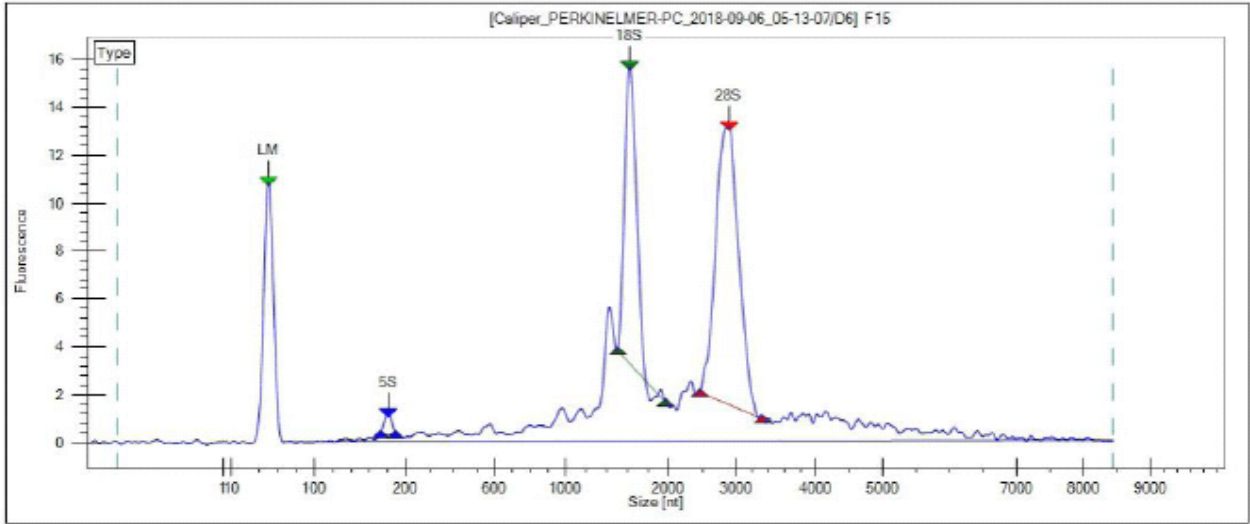

F16

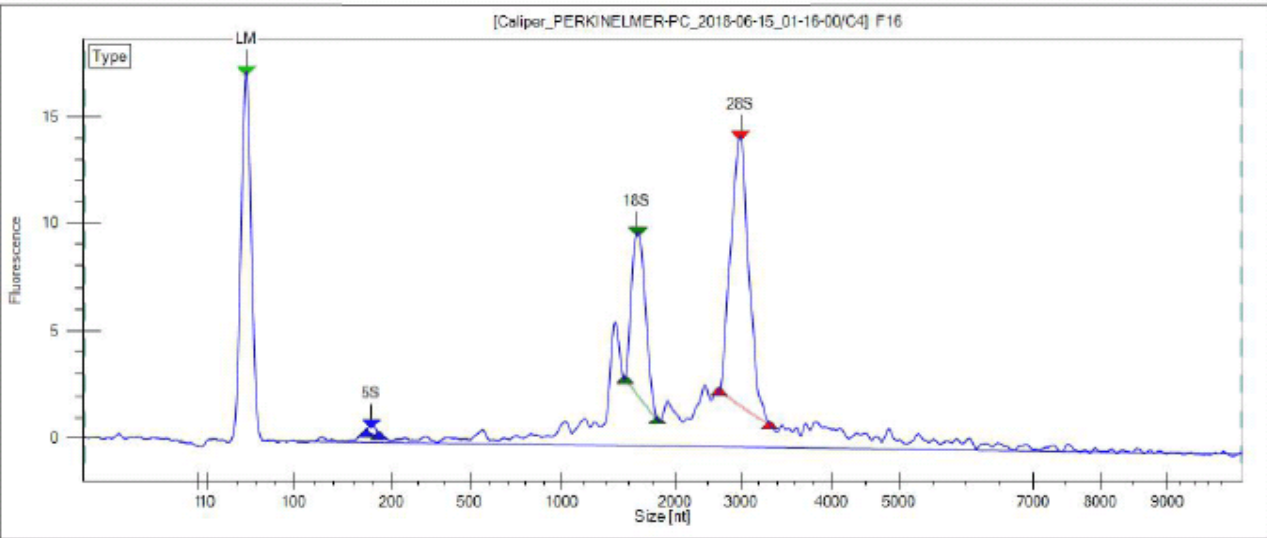

F17

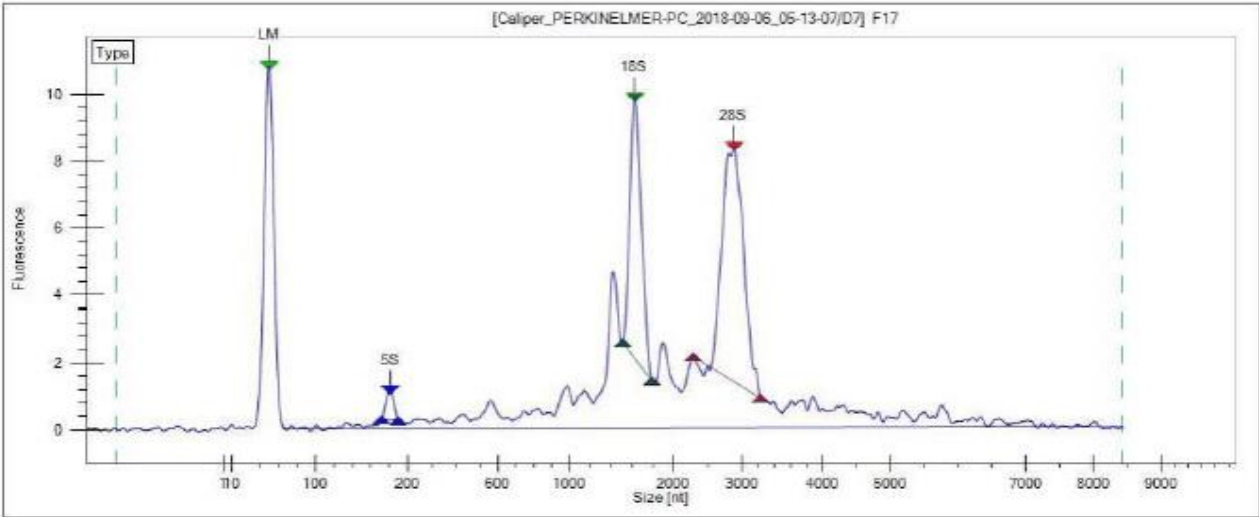

F18

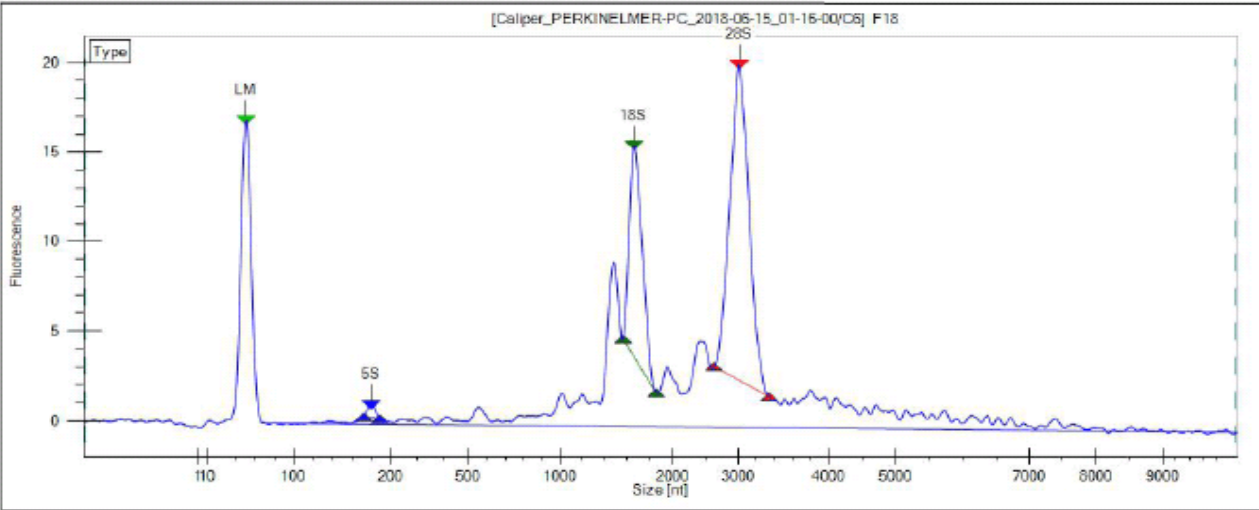

F19

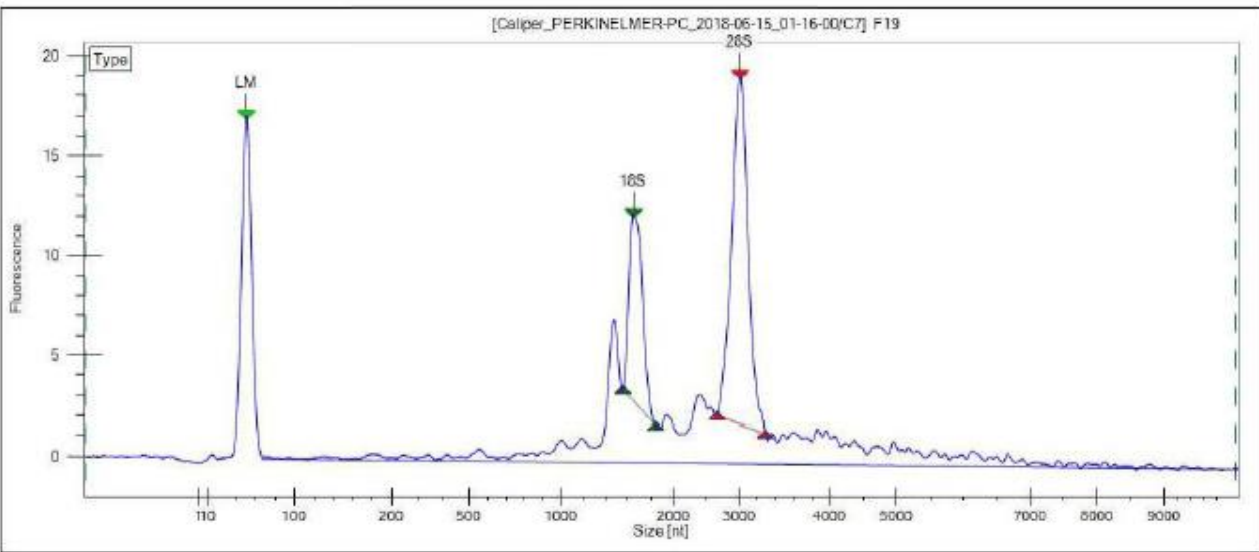

F20

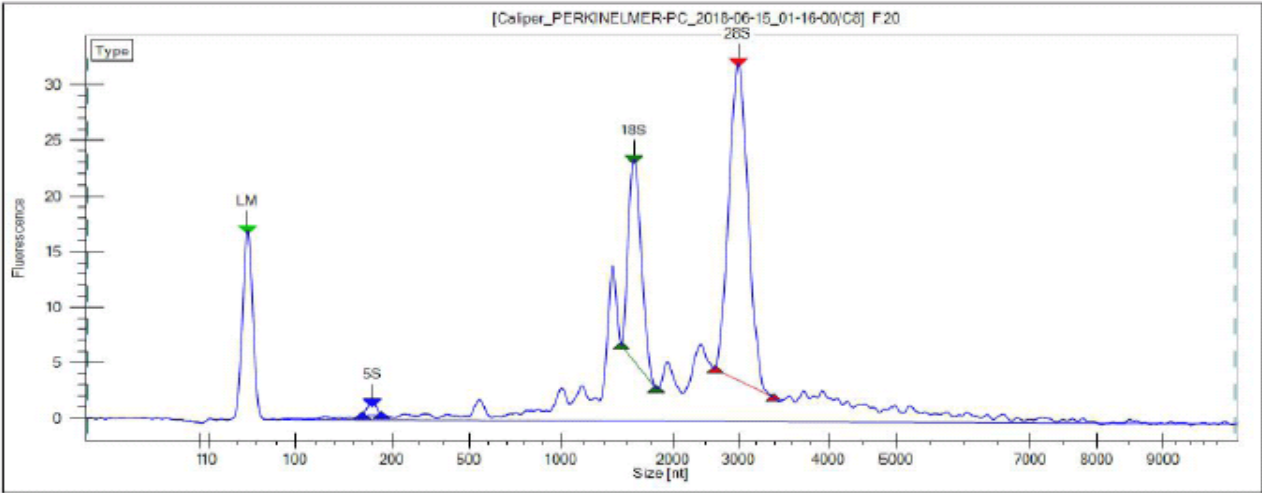

F21

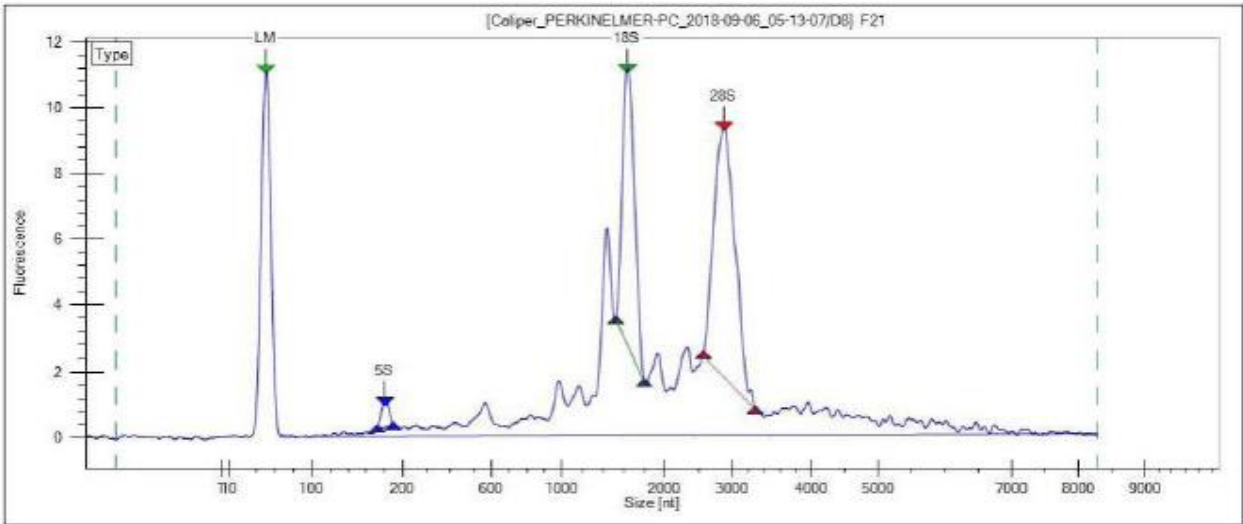

F22

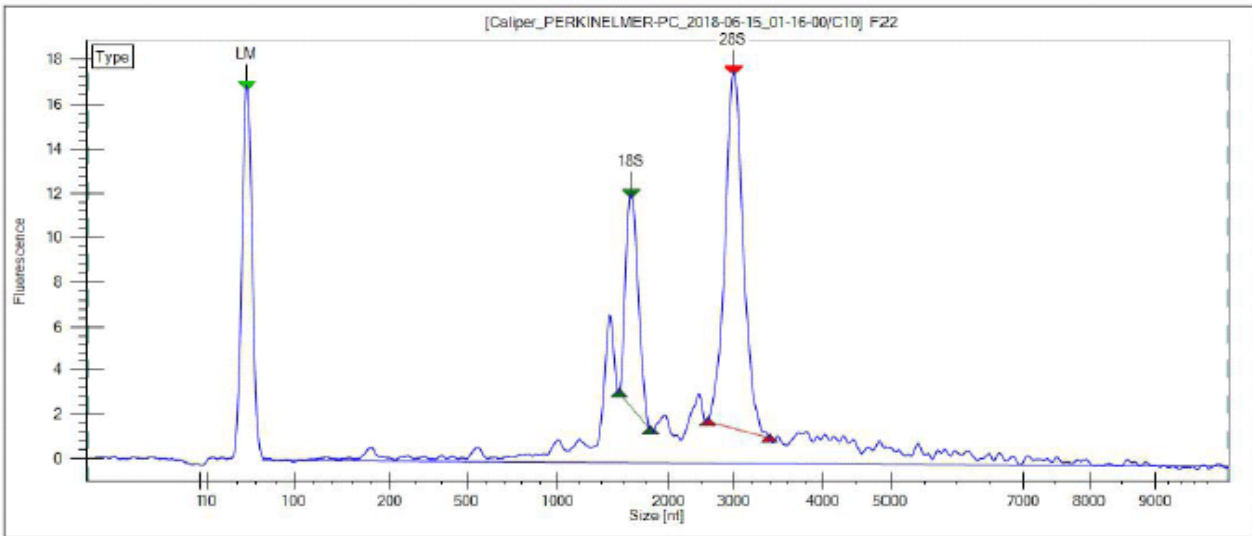

F23

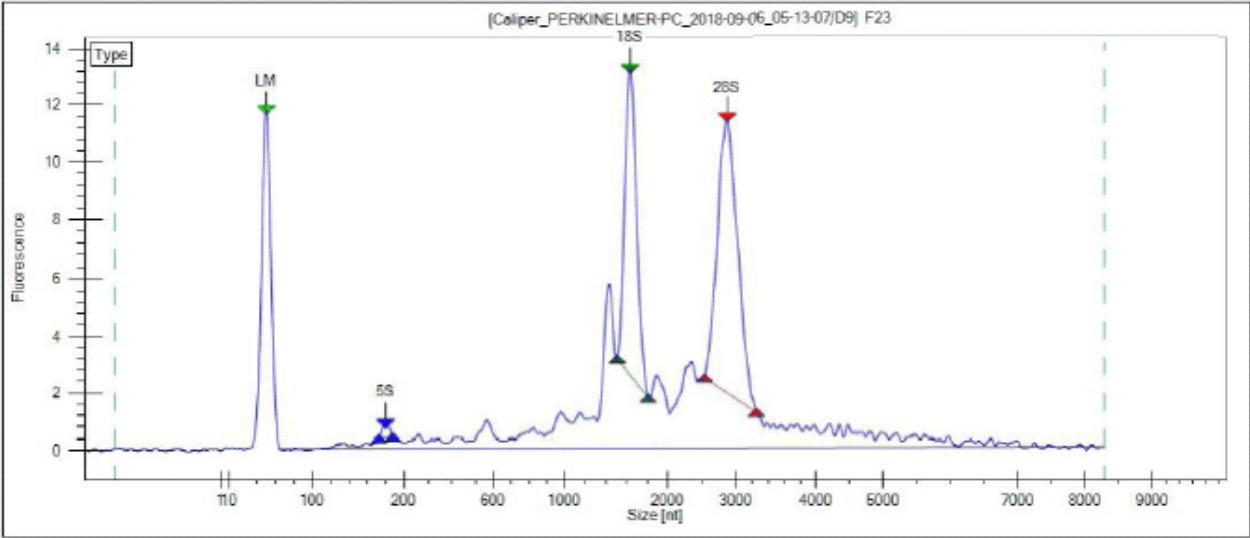

F24

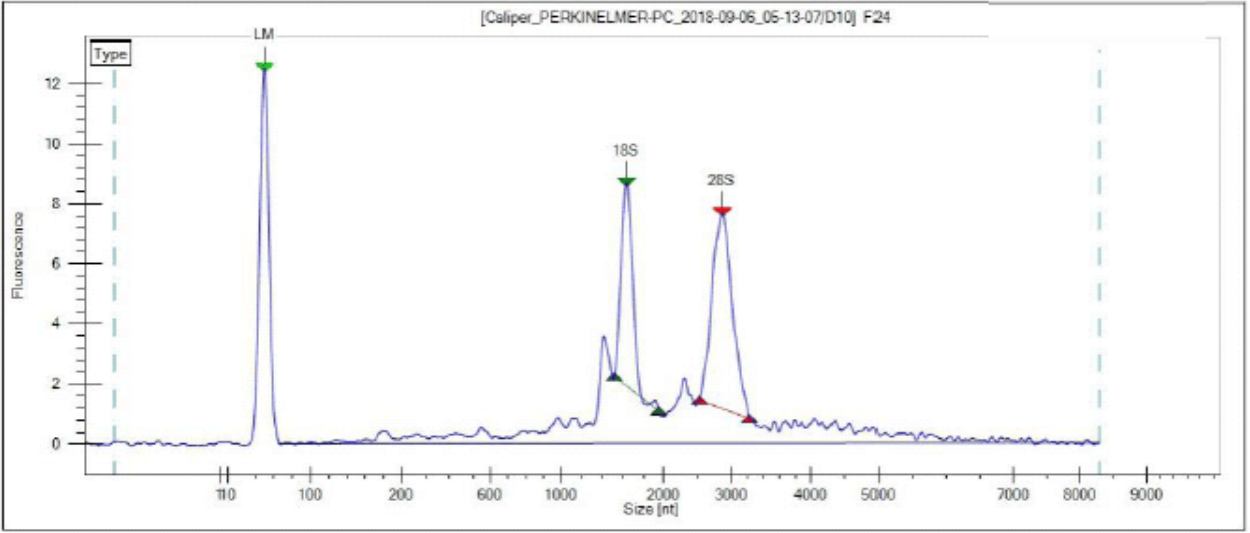

F25

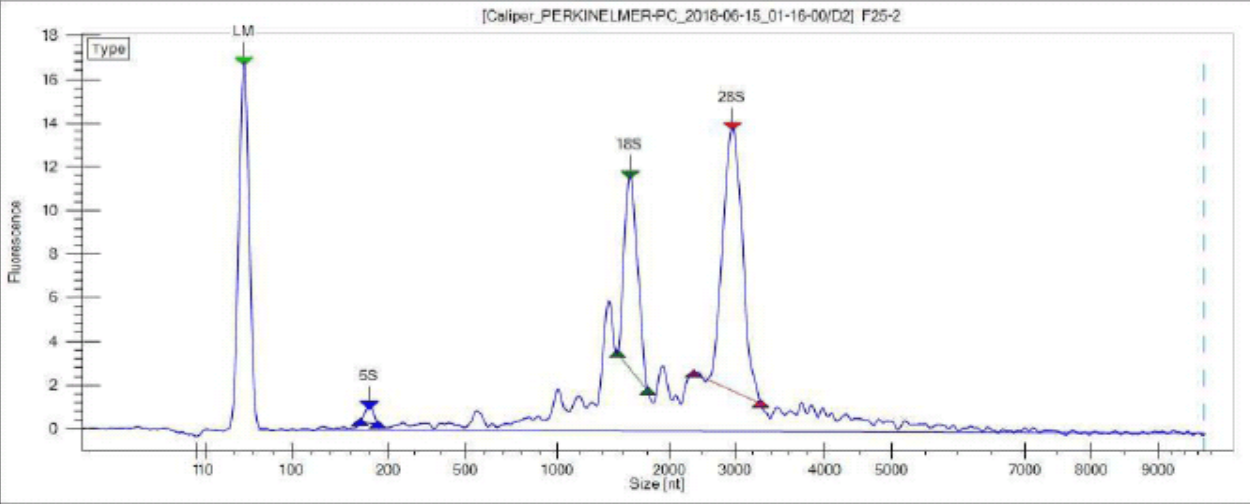

F26

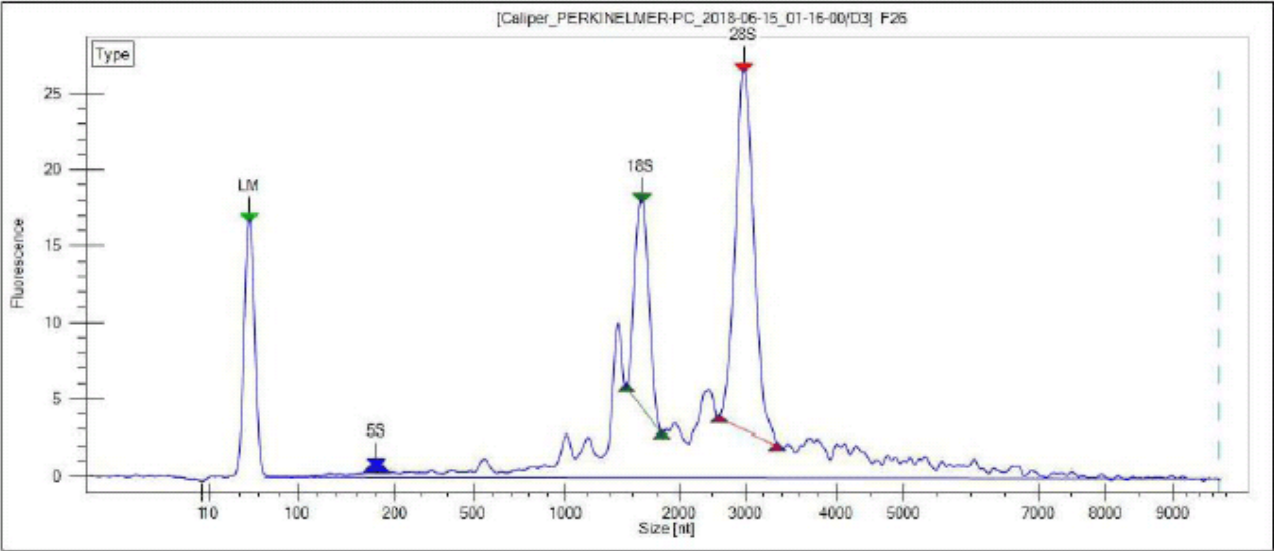

F27

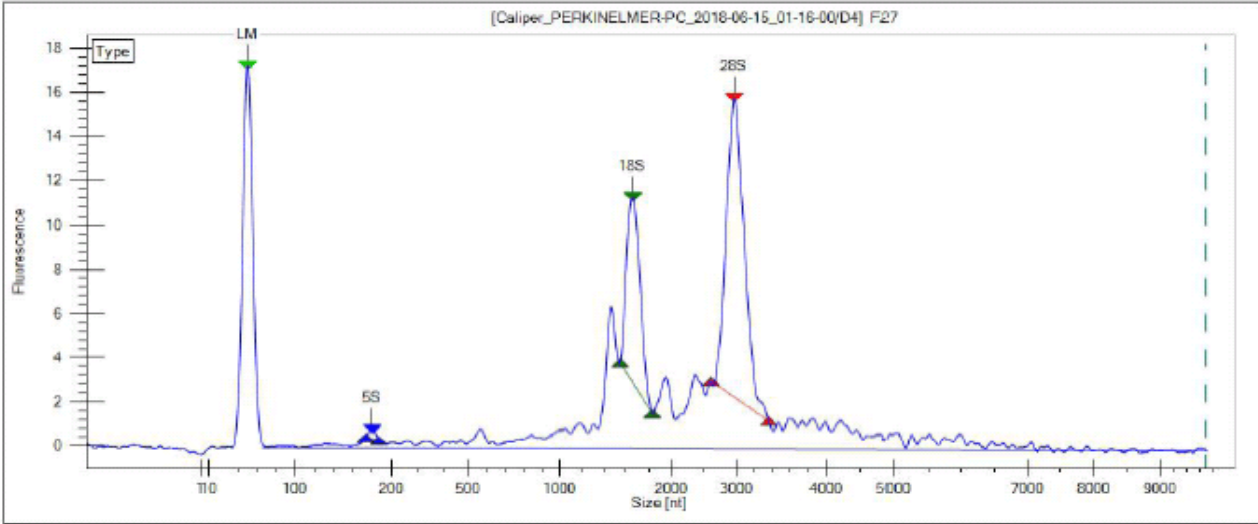

F28

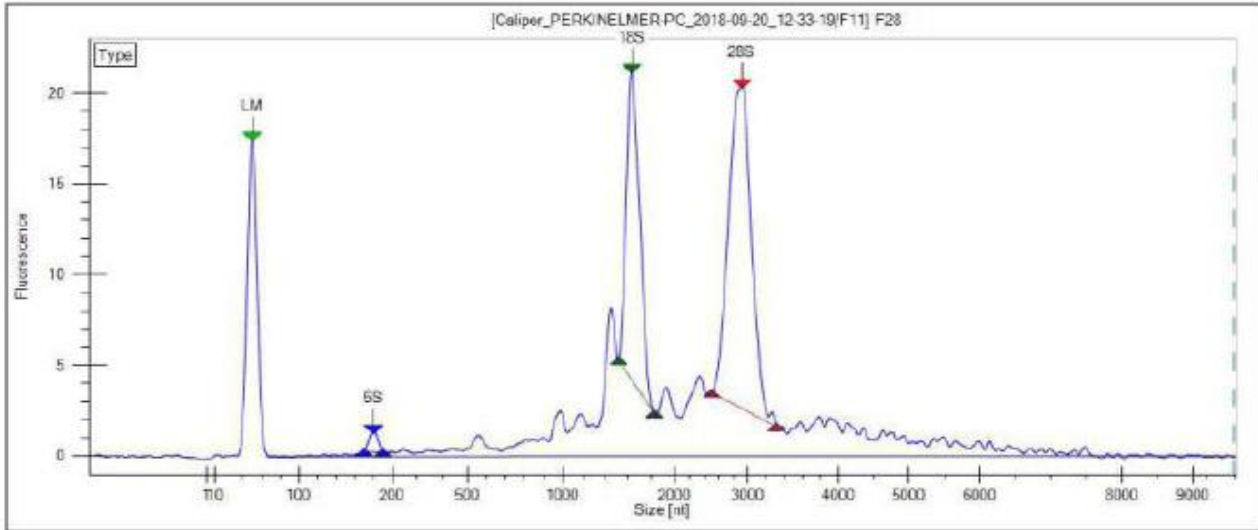



F29

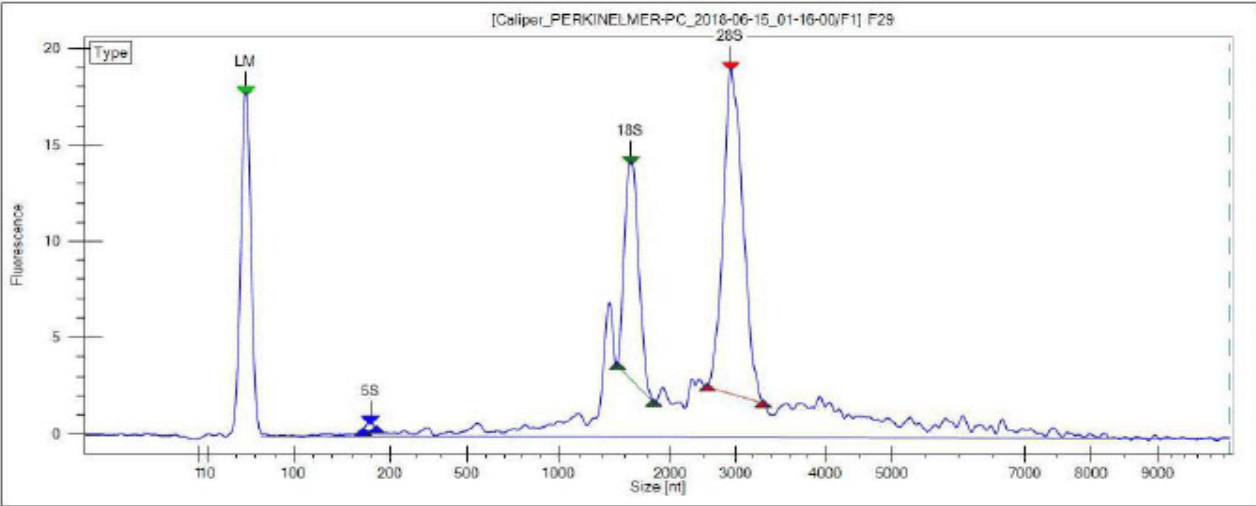

F30

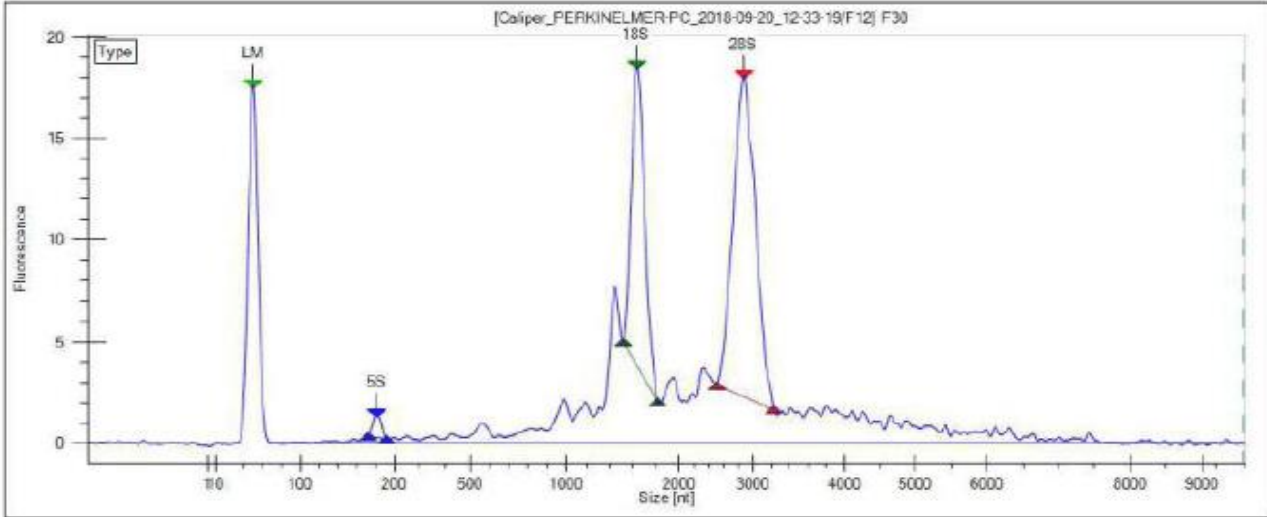

F31

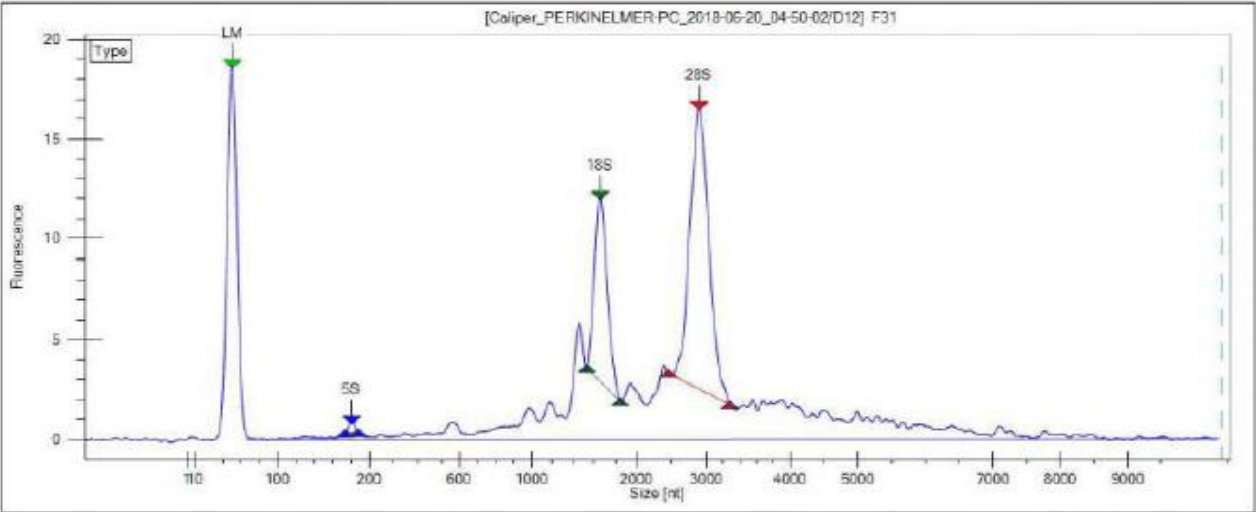



F32

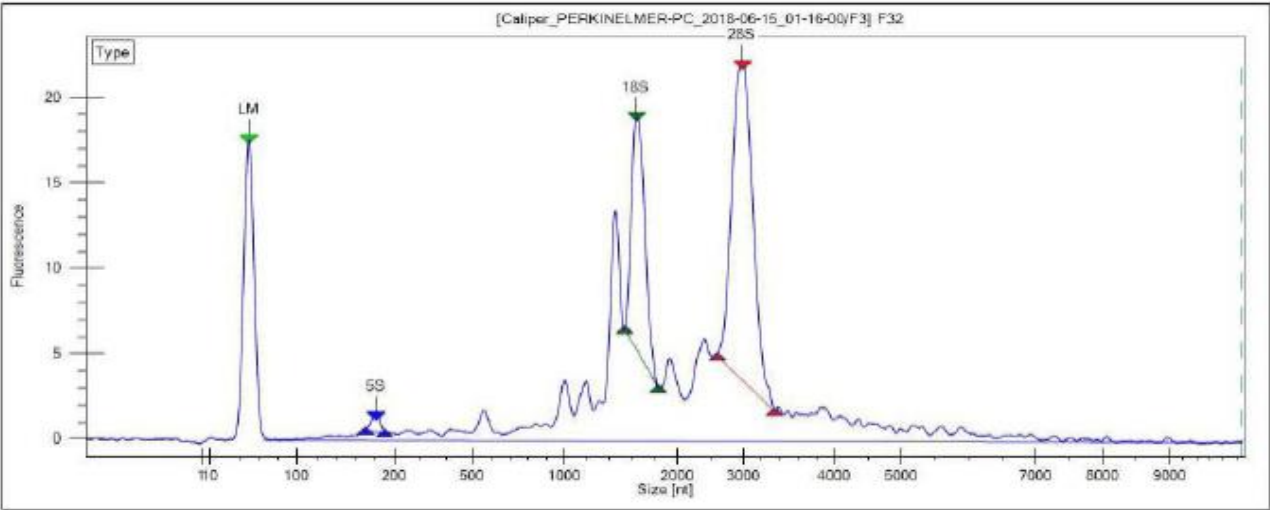

F33

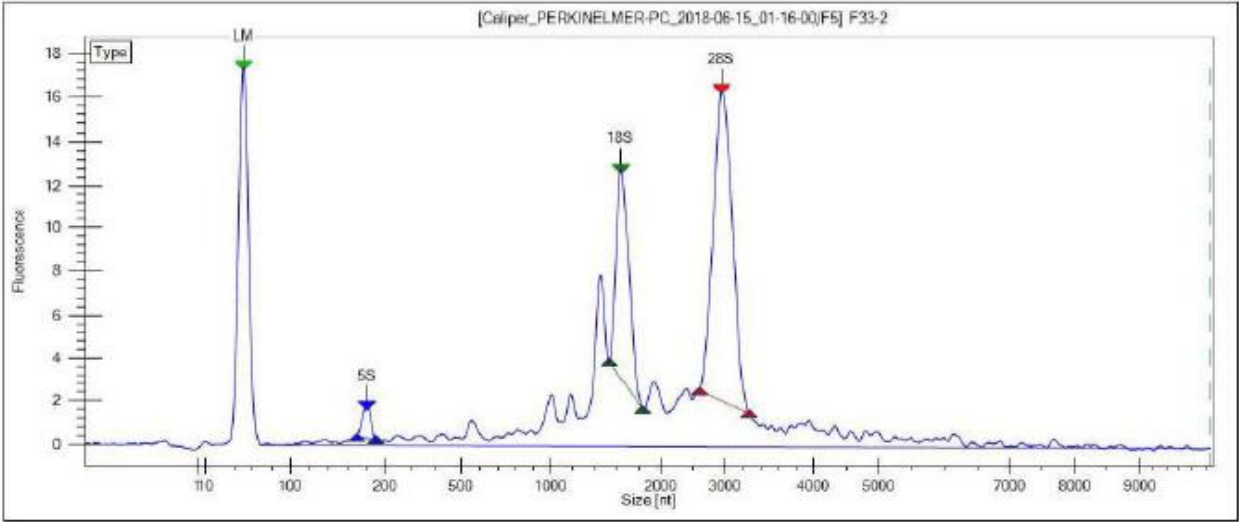

F34

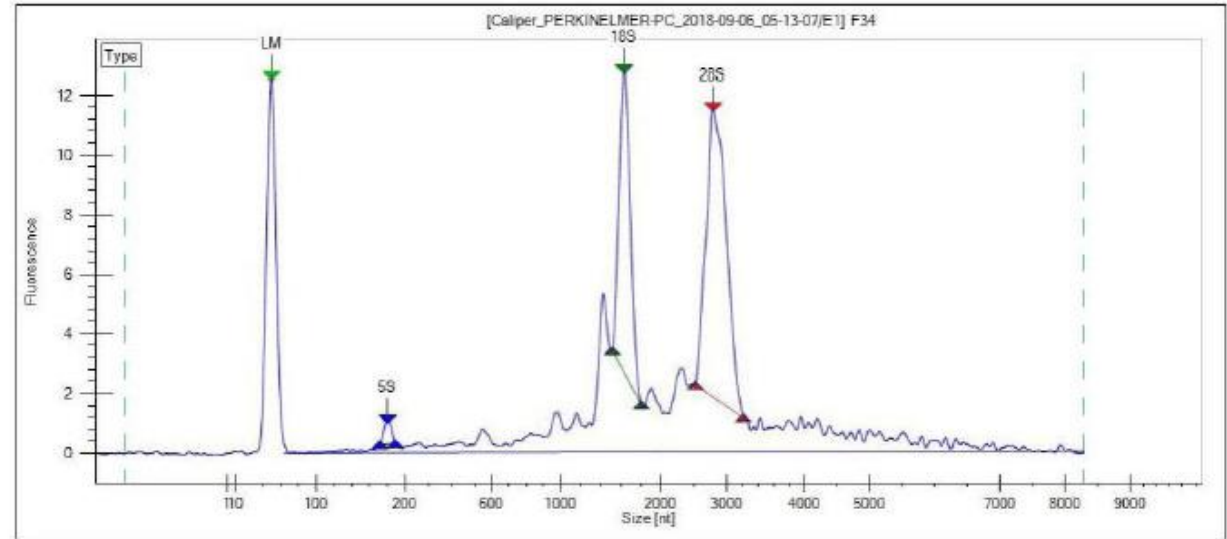

F35

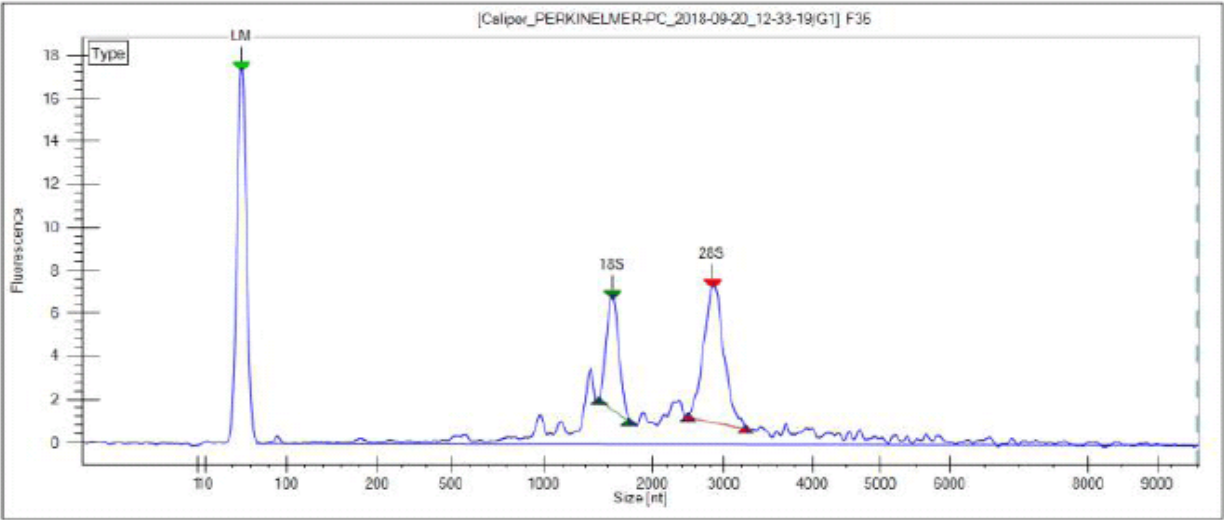

F36

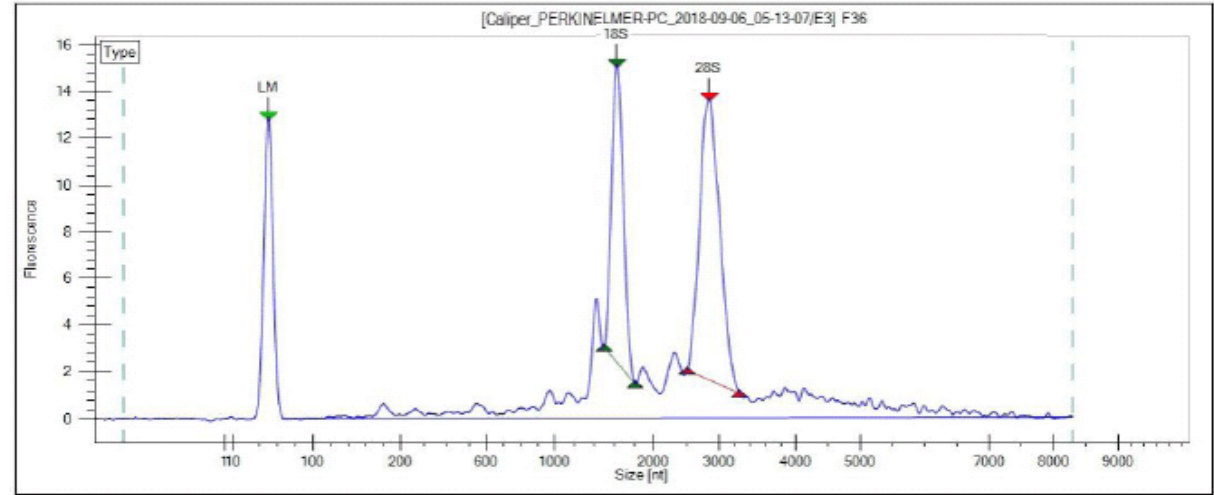

F37

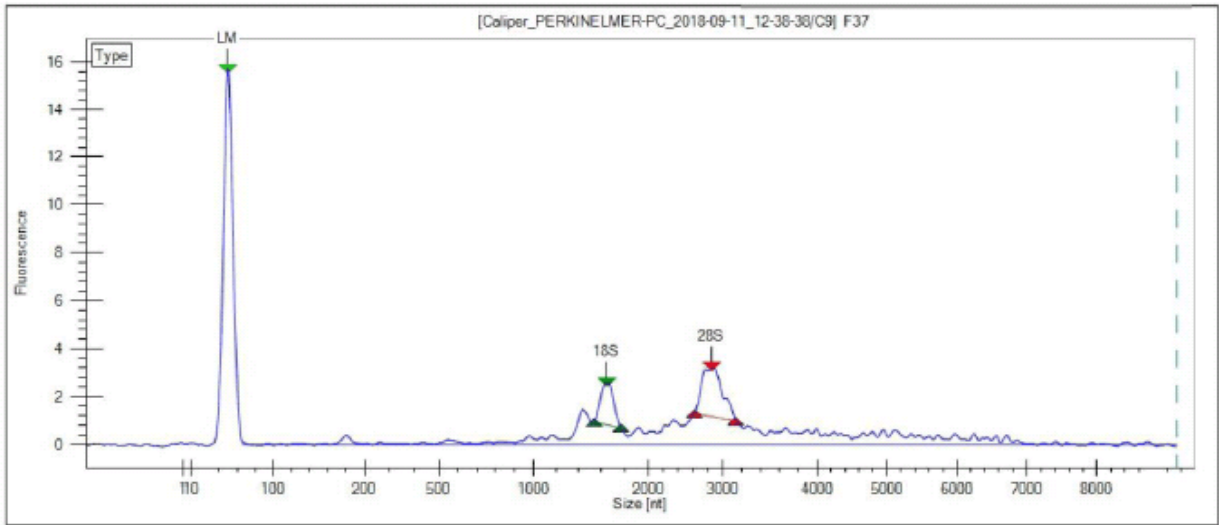

F38

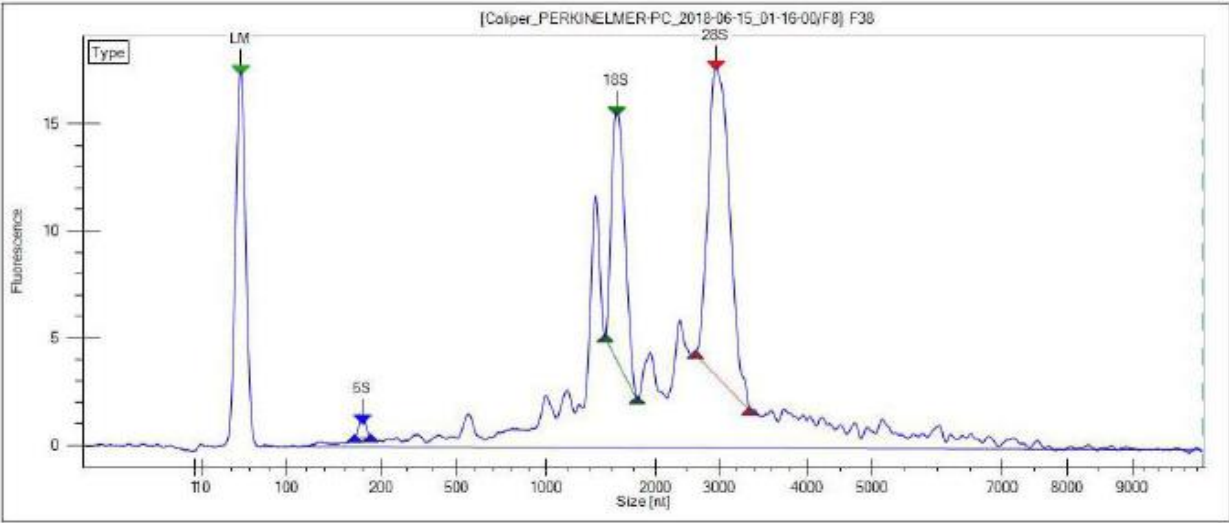

F39

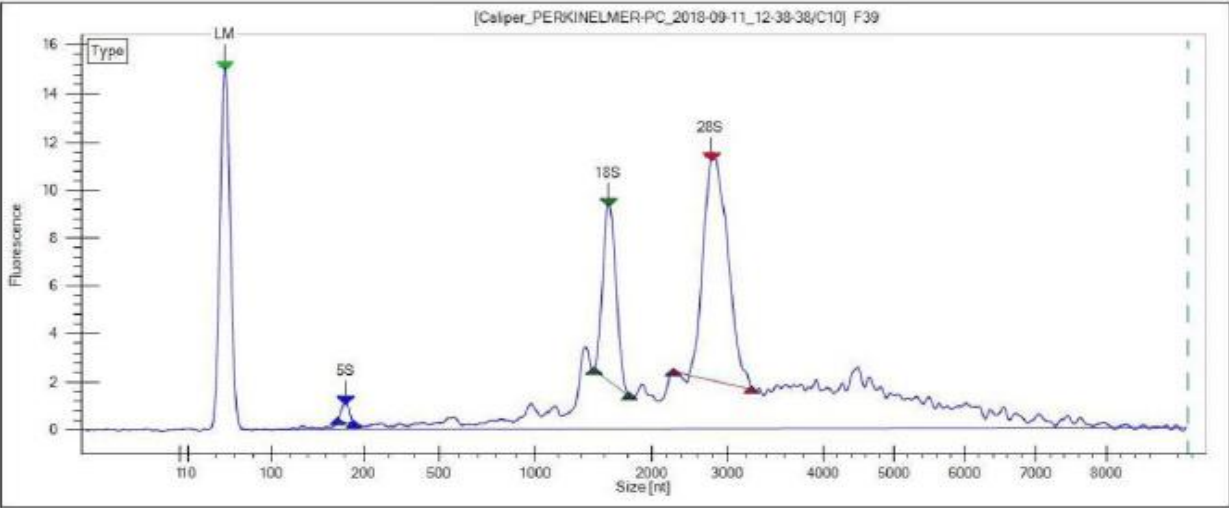

F40

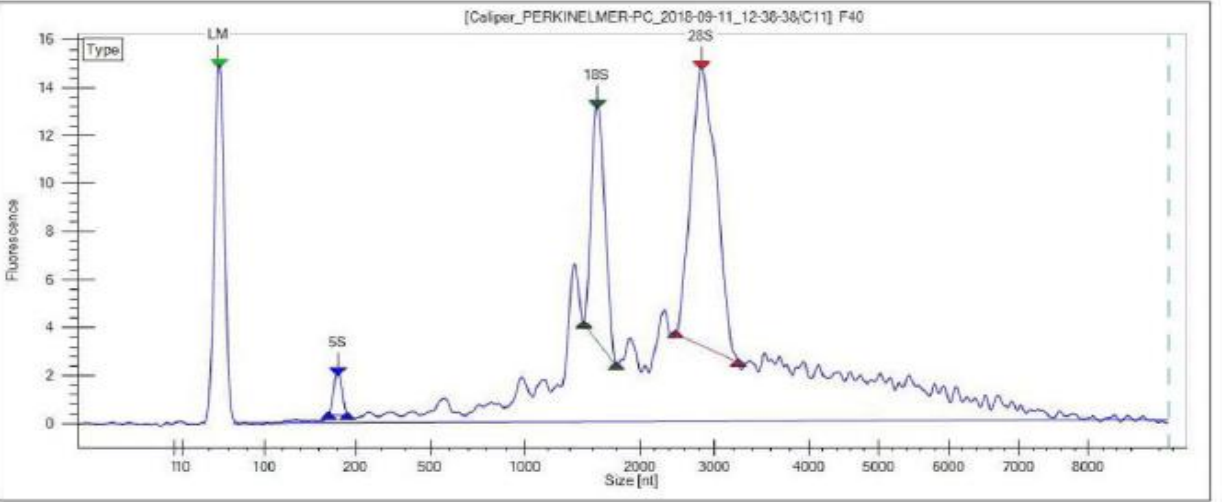

F41

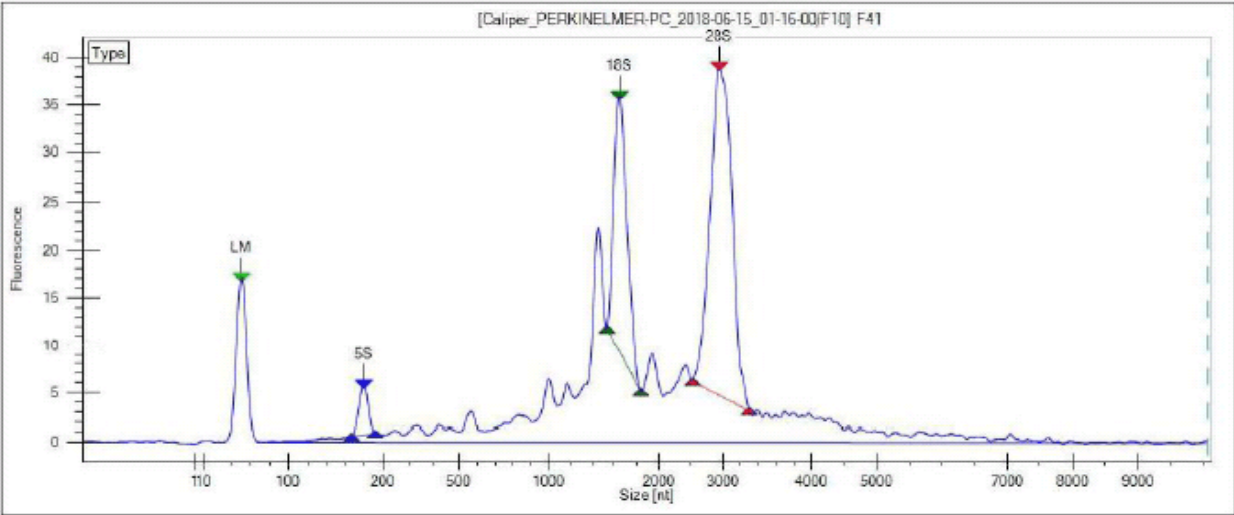

F42

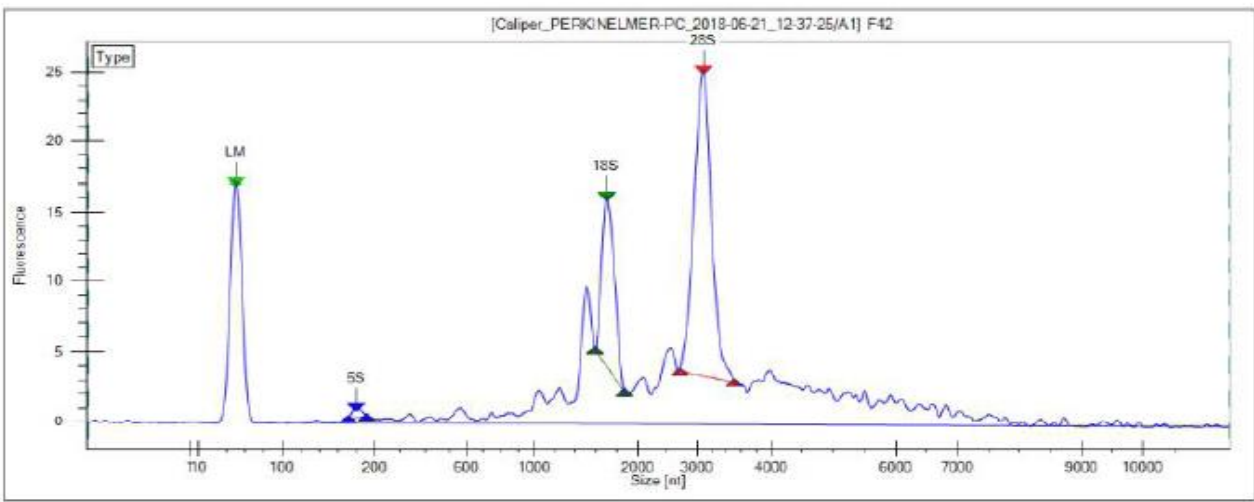

F43

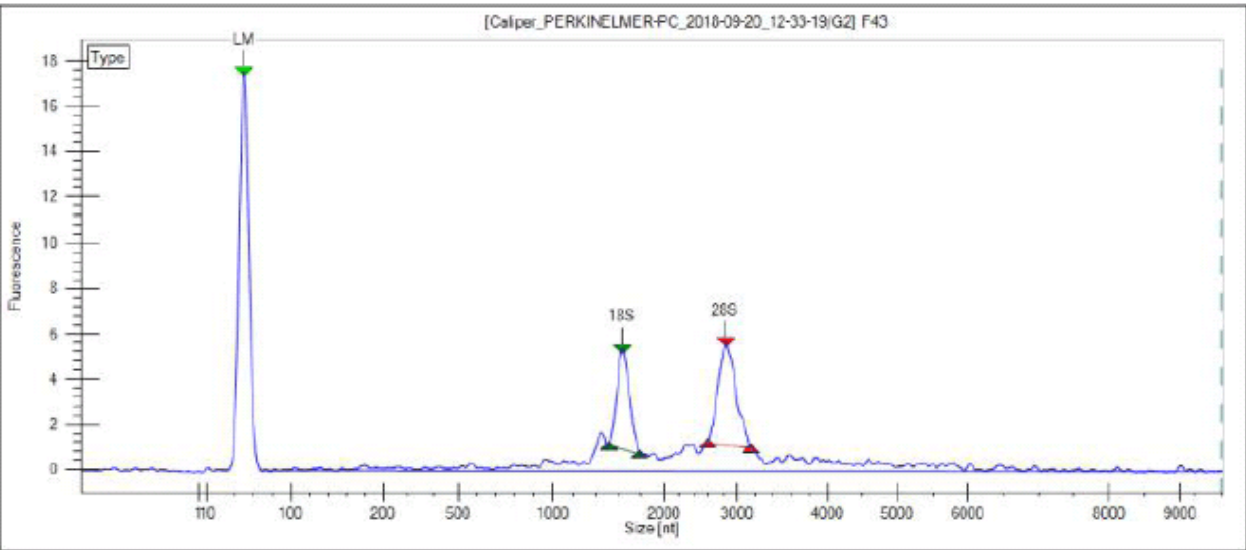

F44

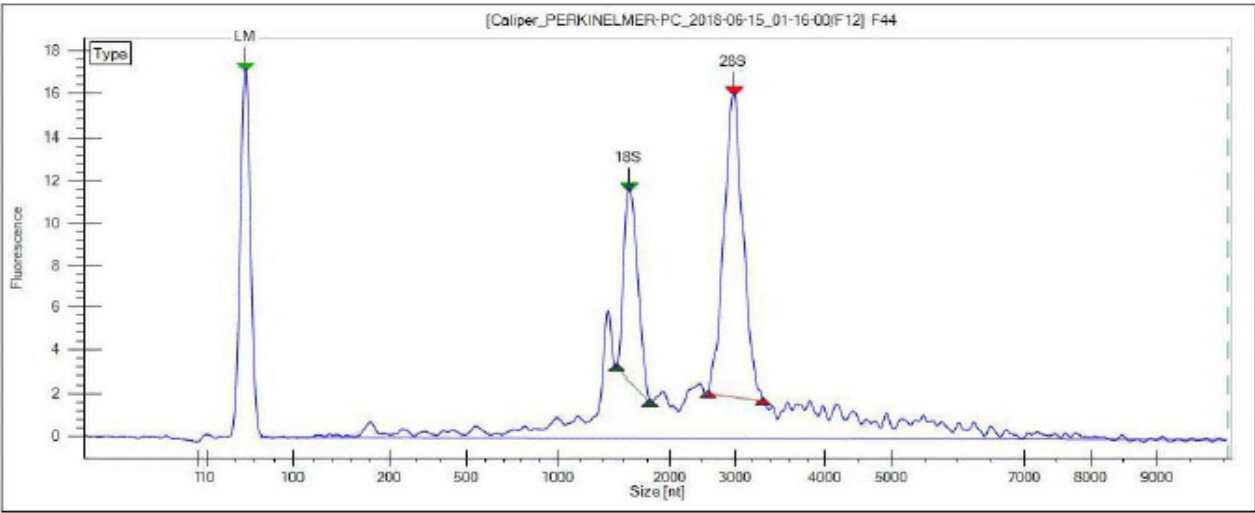

F45

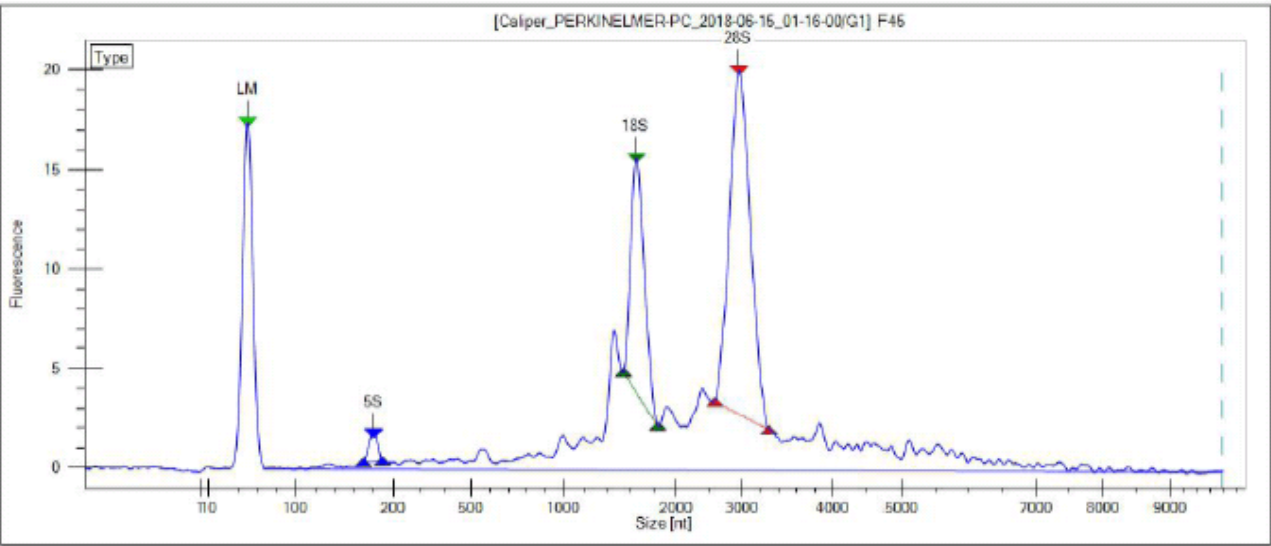

F46

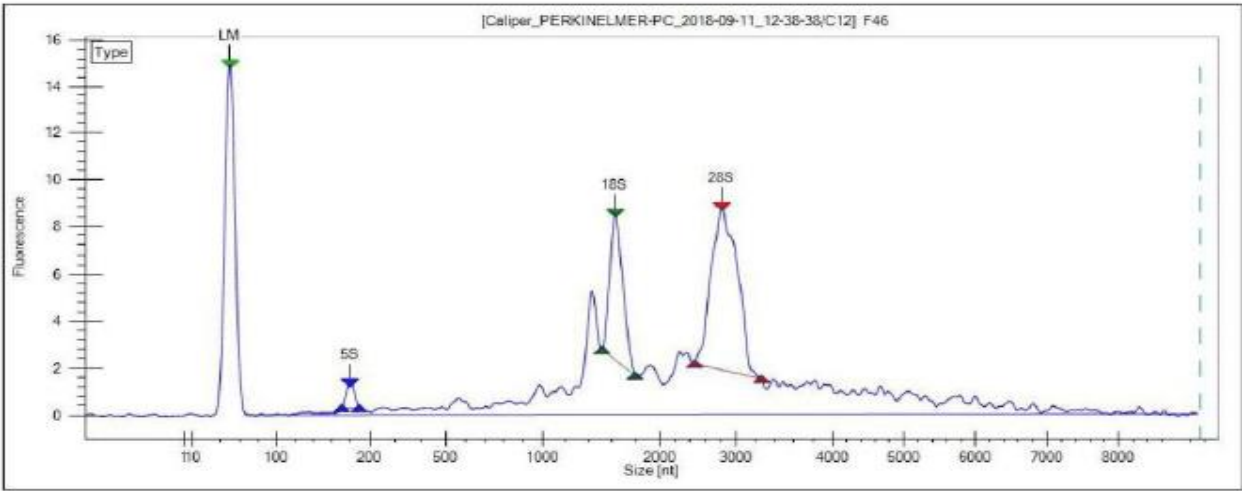



F47

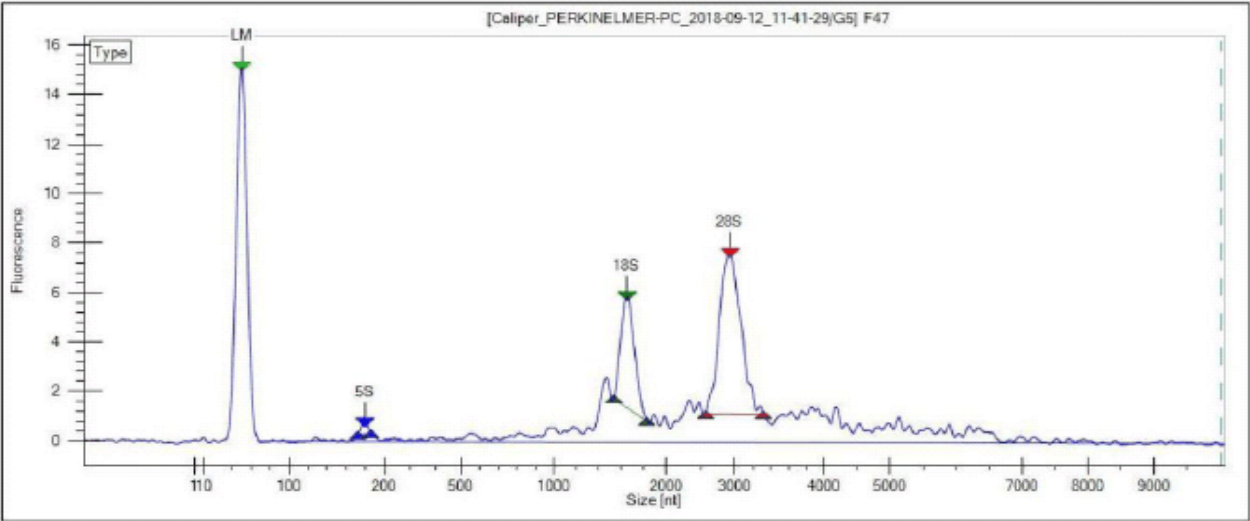

F48

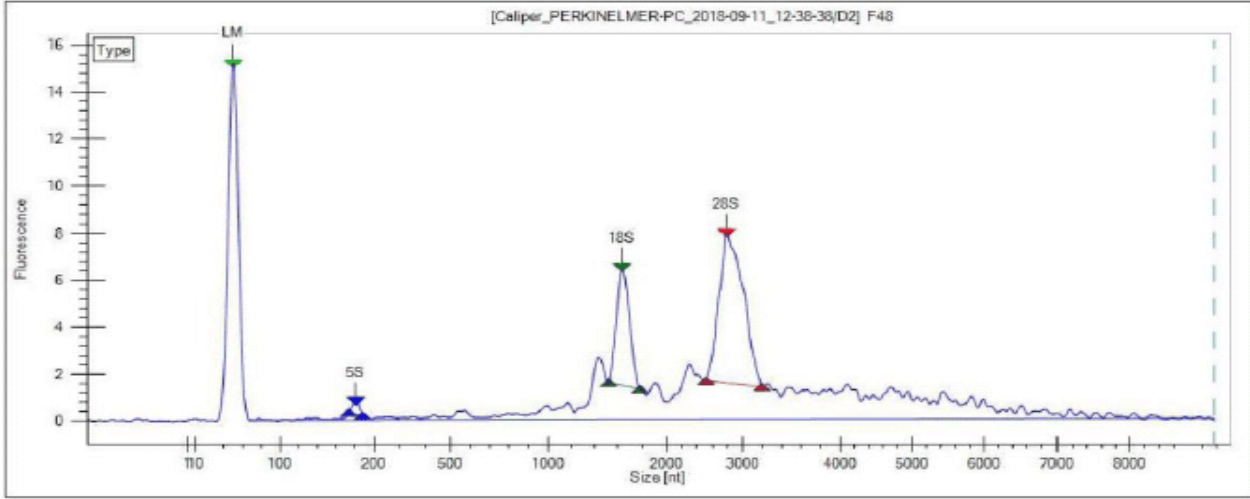

F49

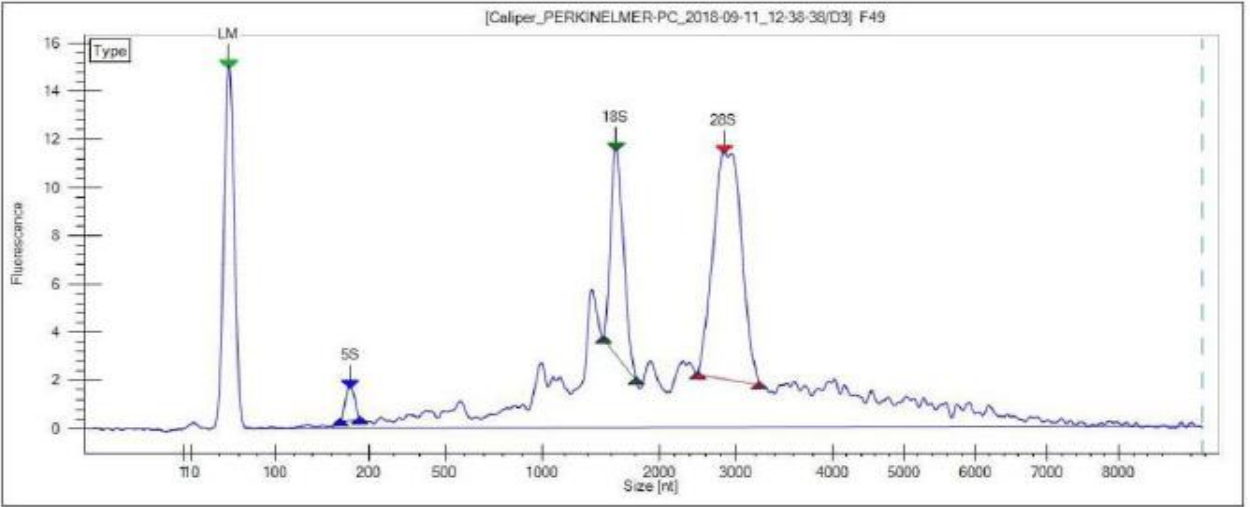



F50

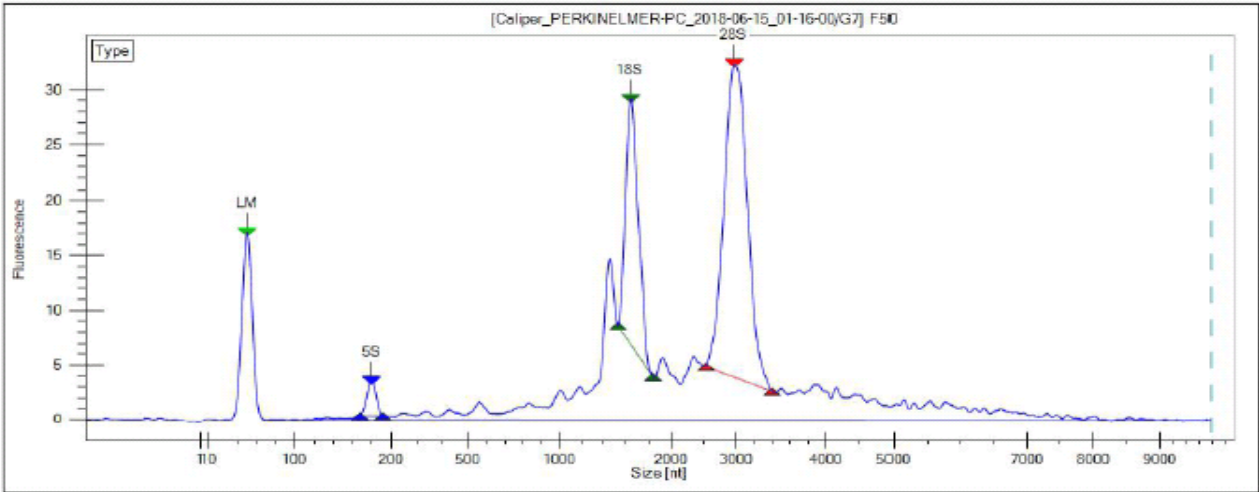

F51

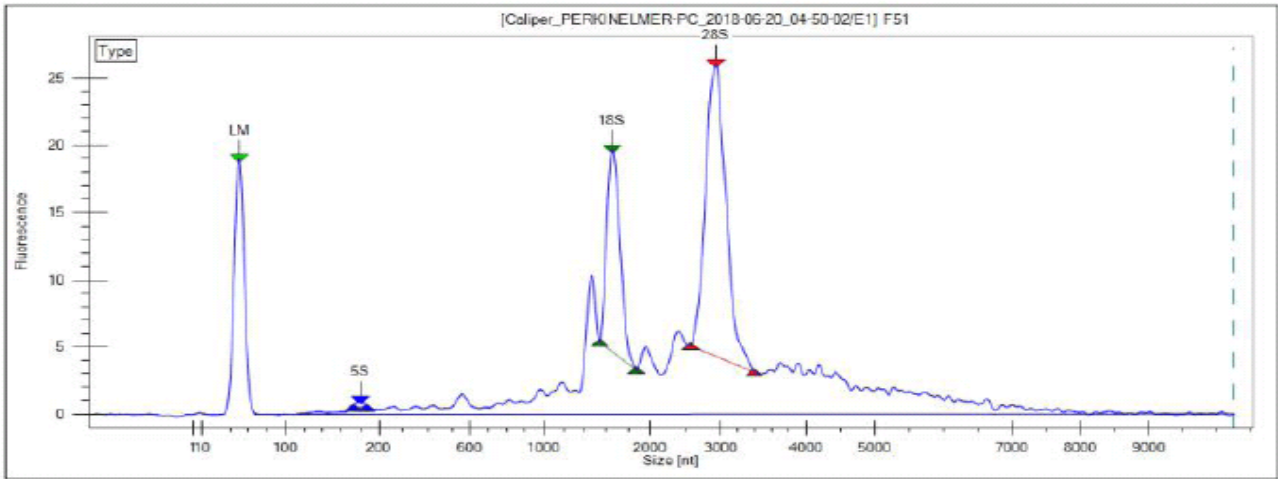

F52

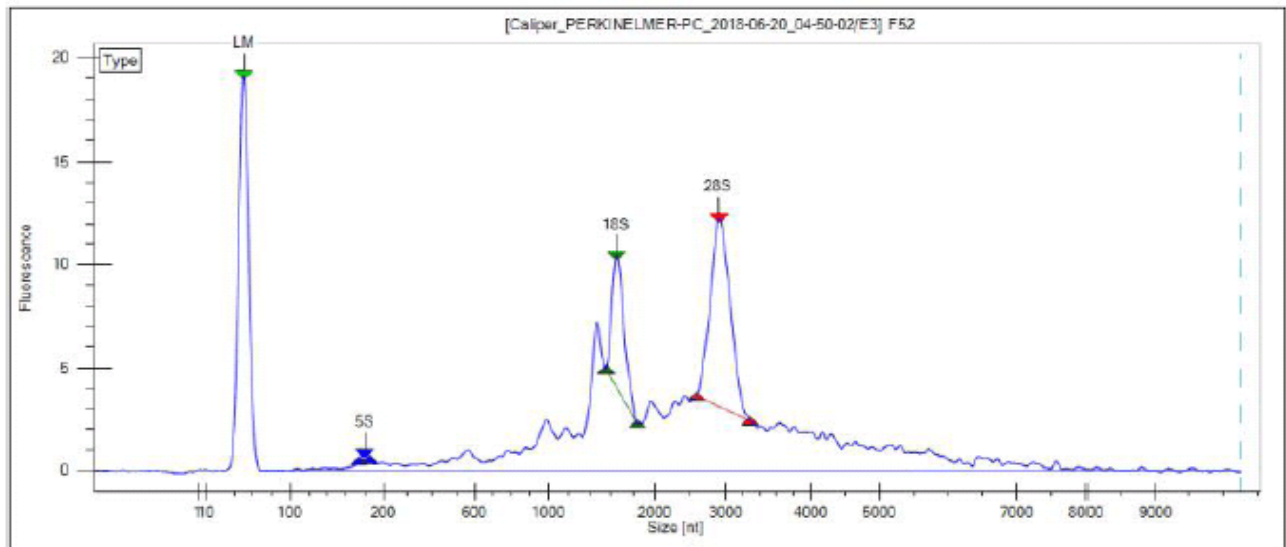

F54

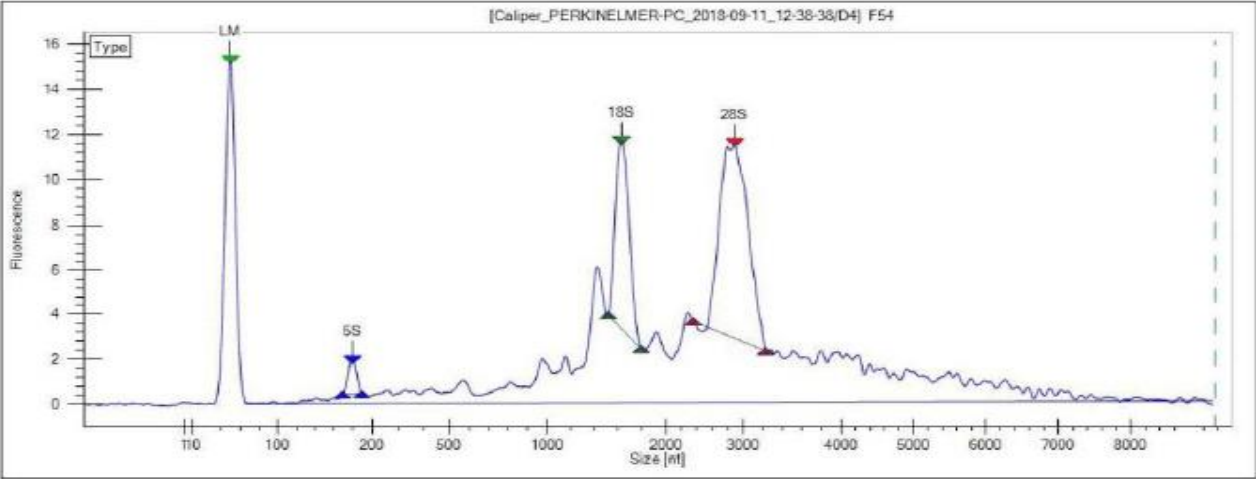

F55

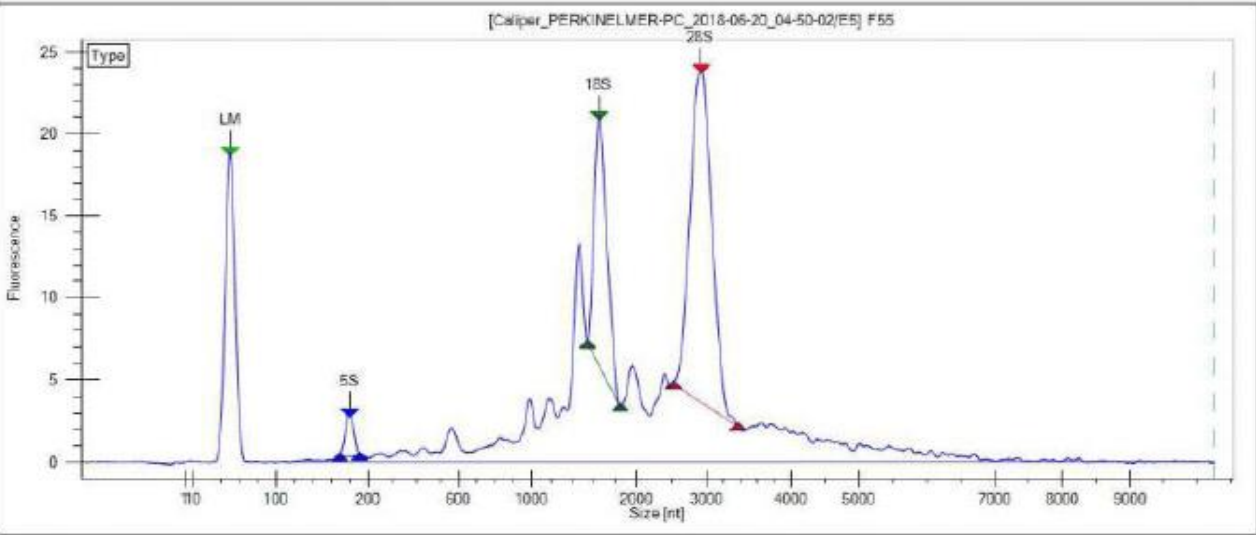

F56

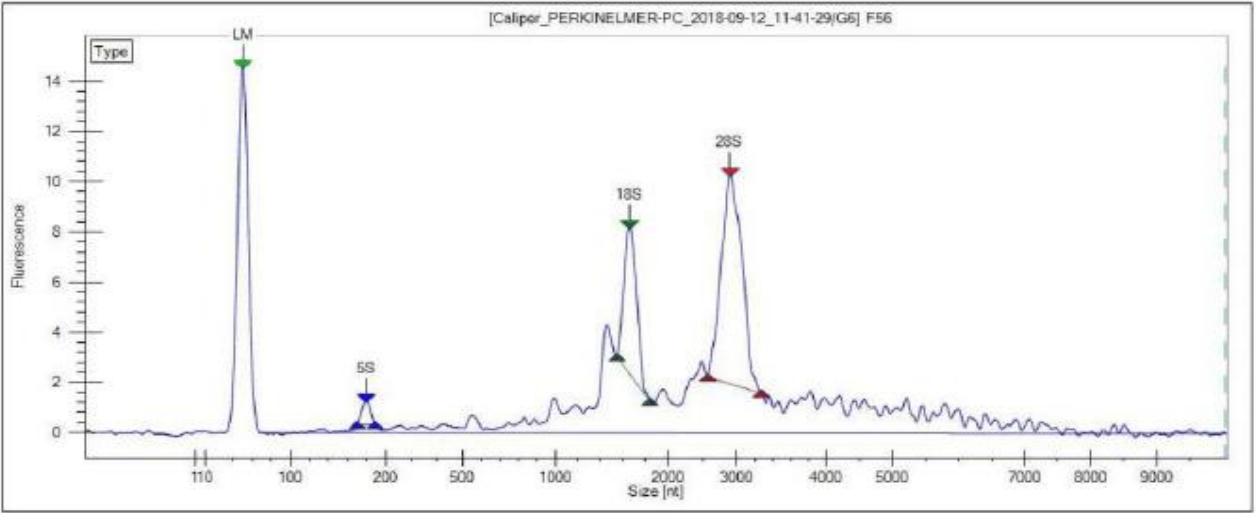

F57

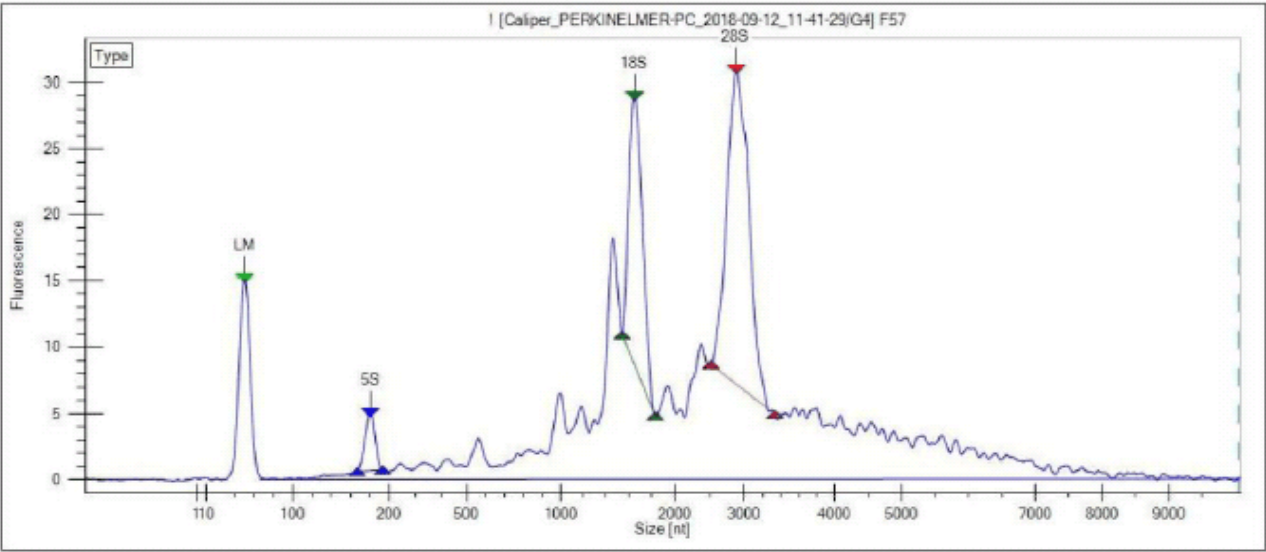

F58

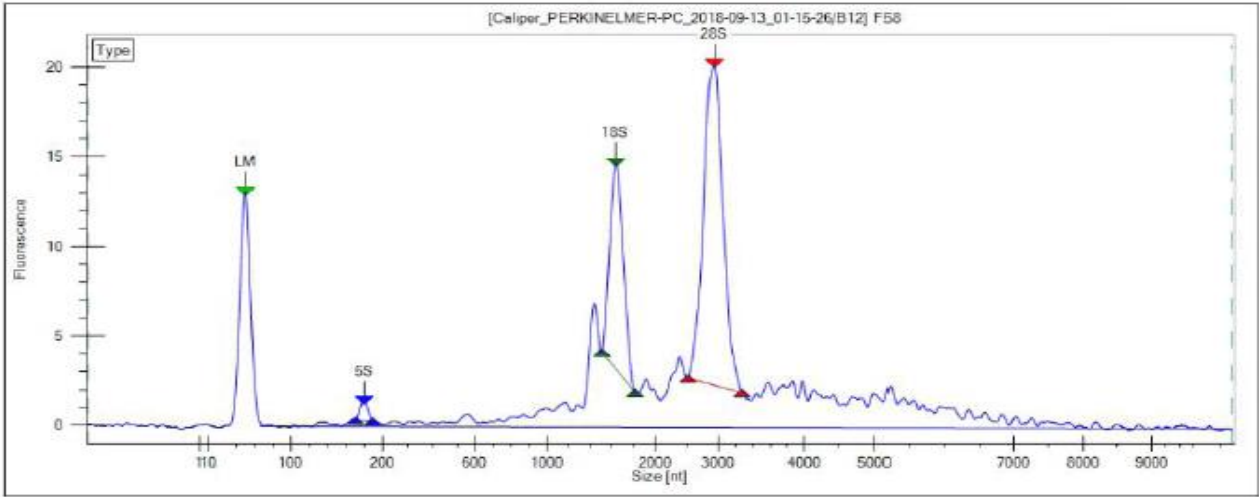

F61

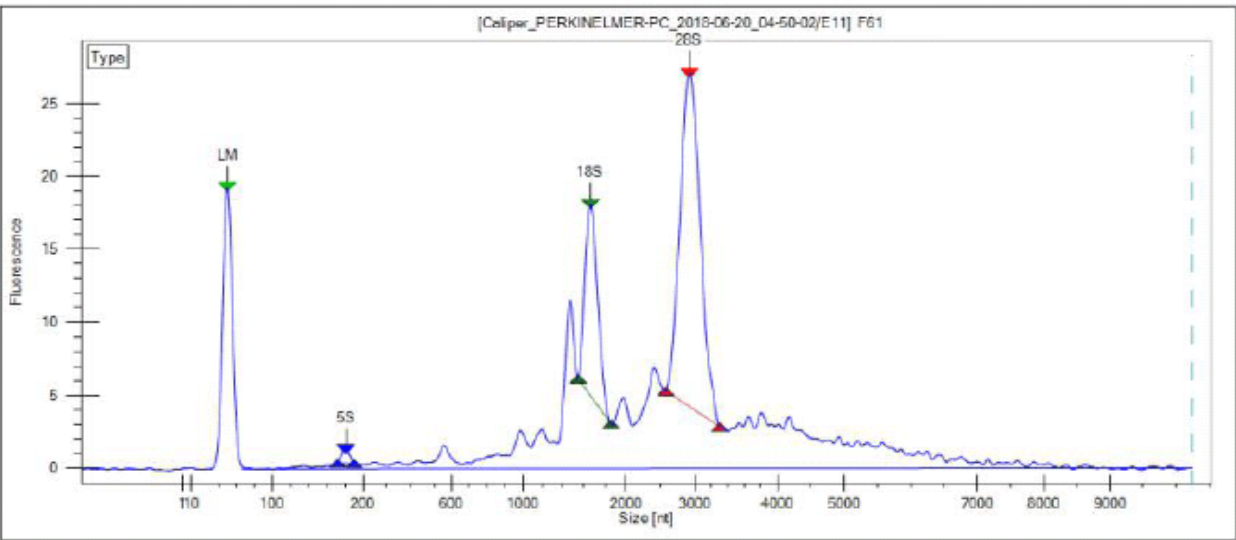

F62

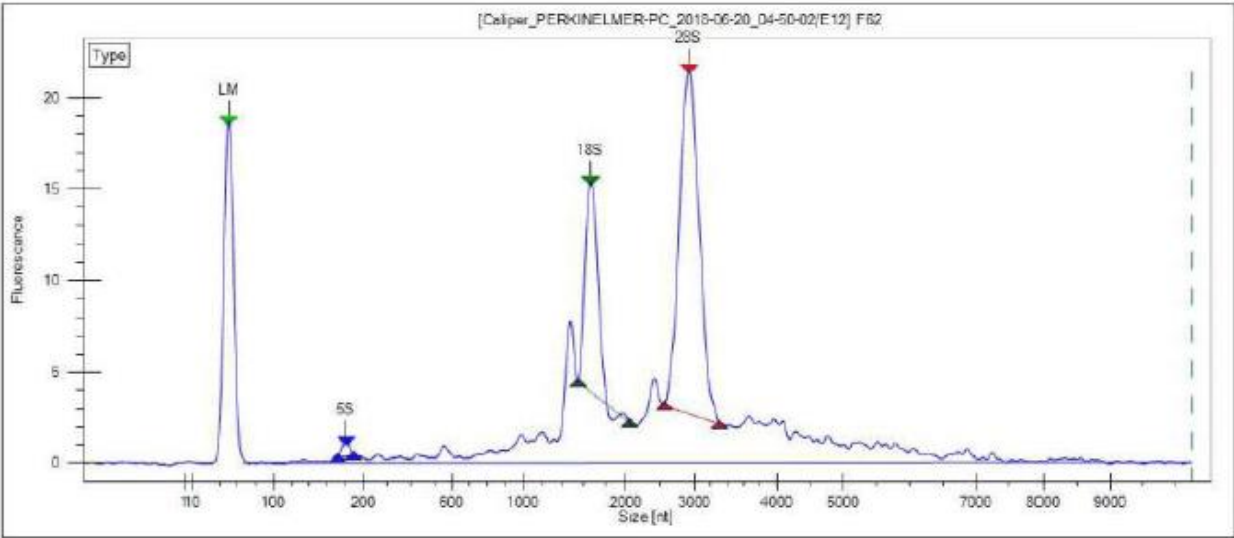

F63

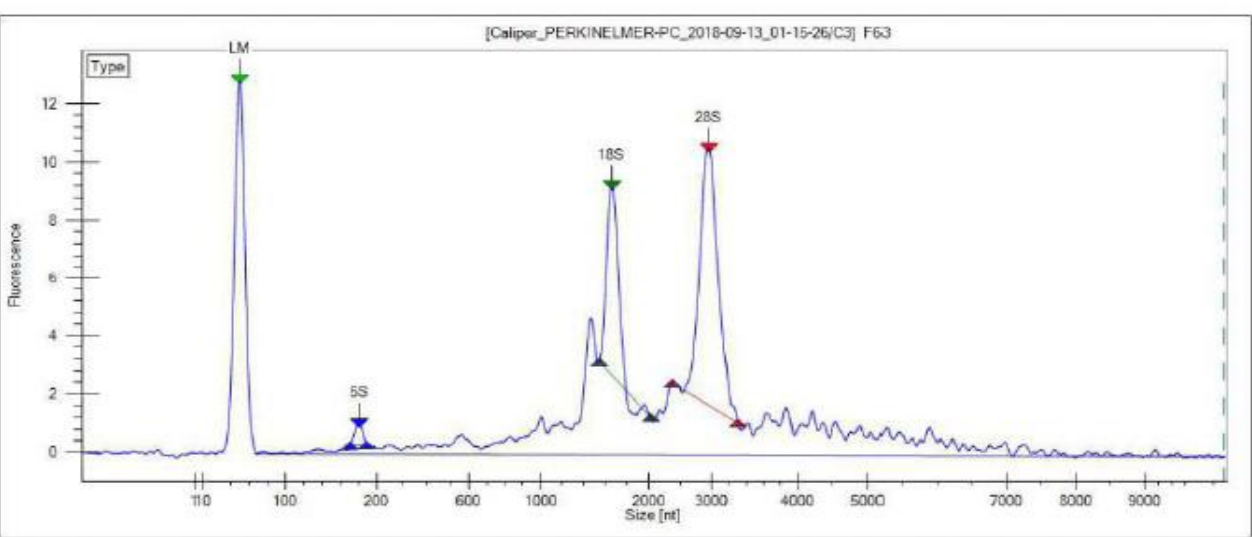

F64

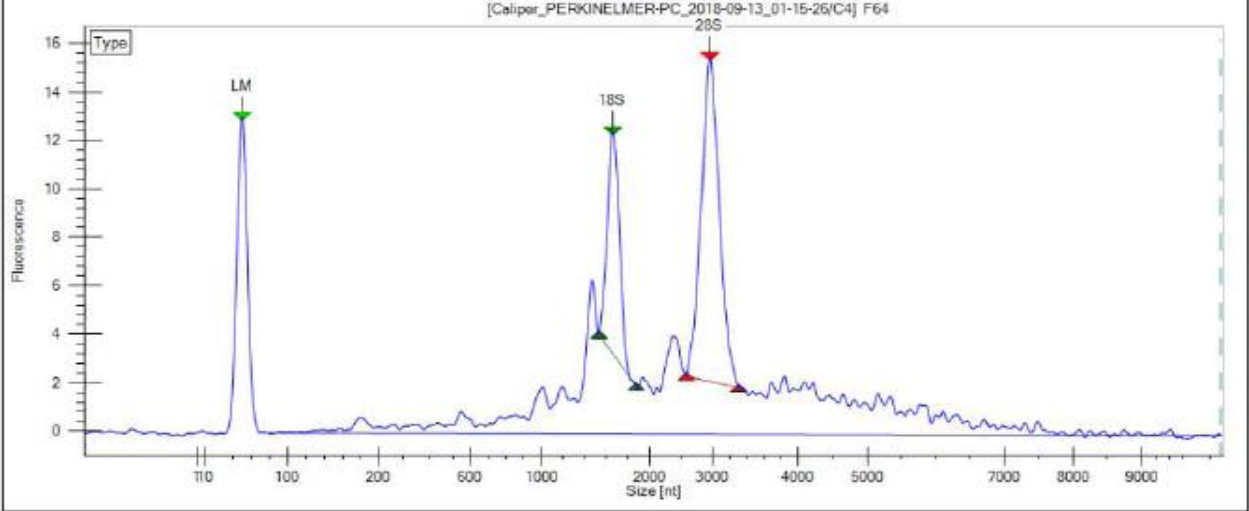

F65

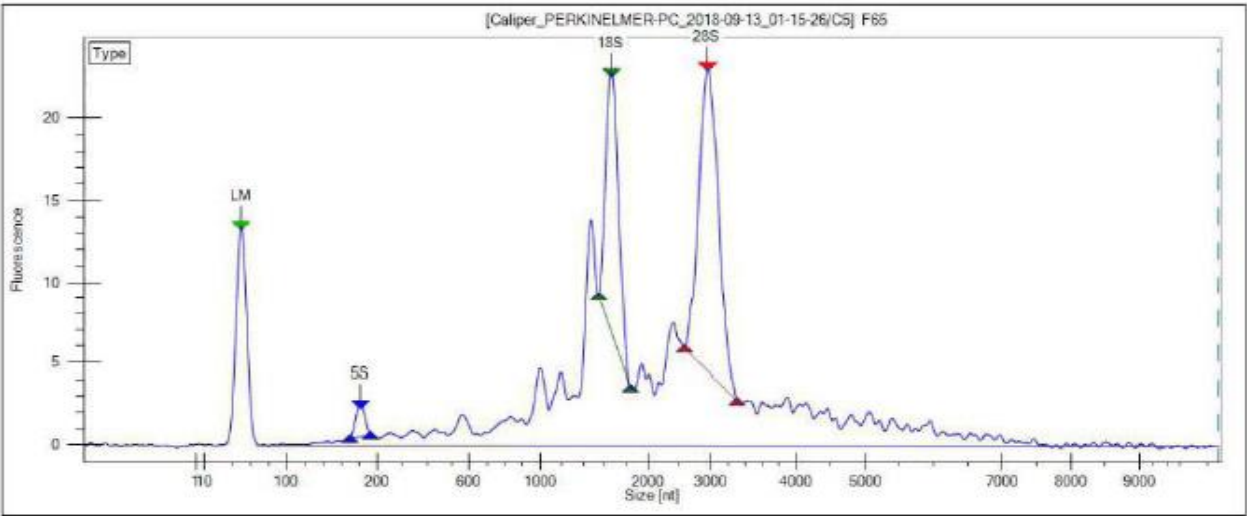

F66

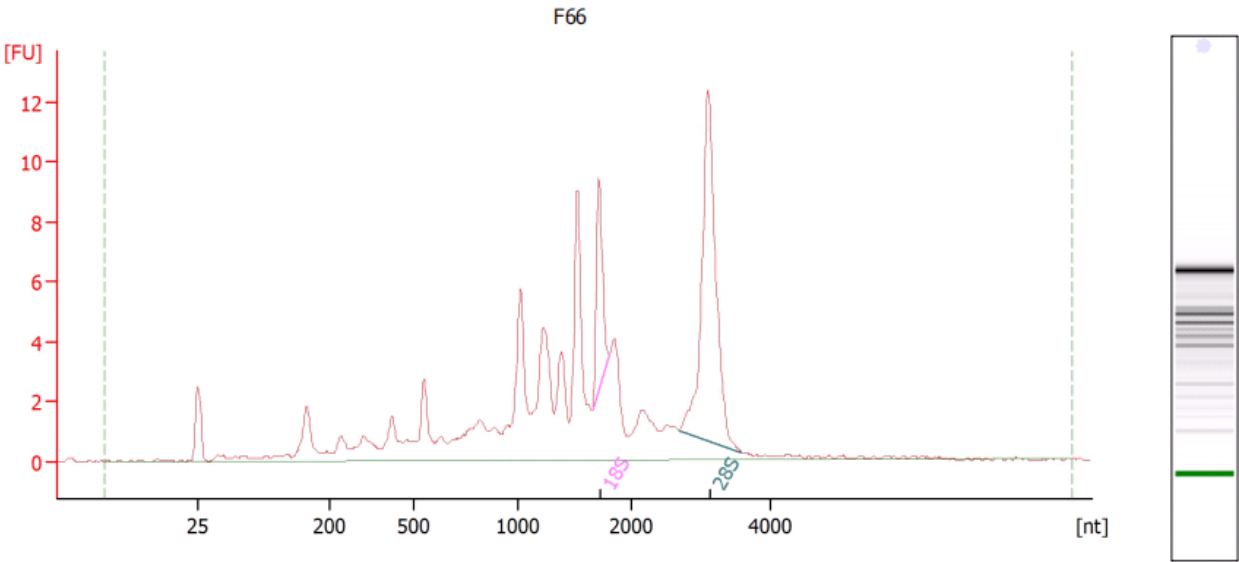

F67

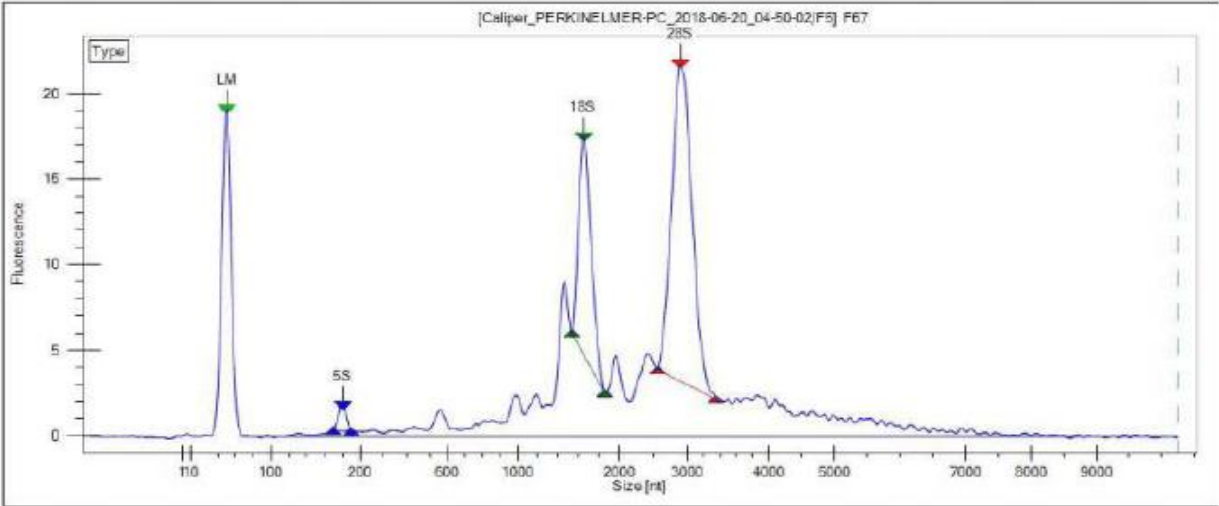

F68

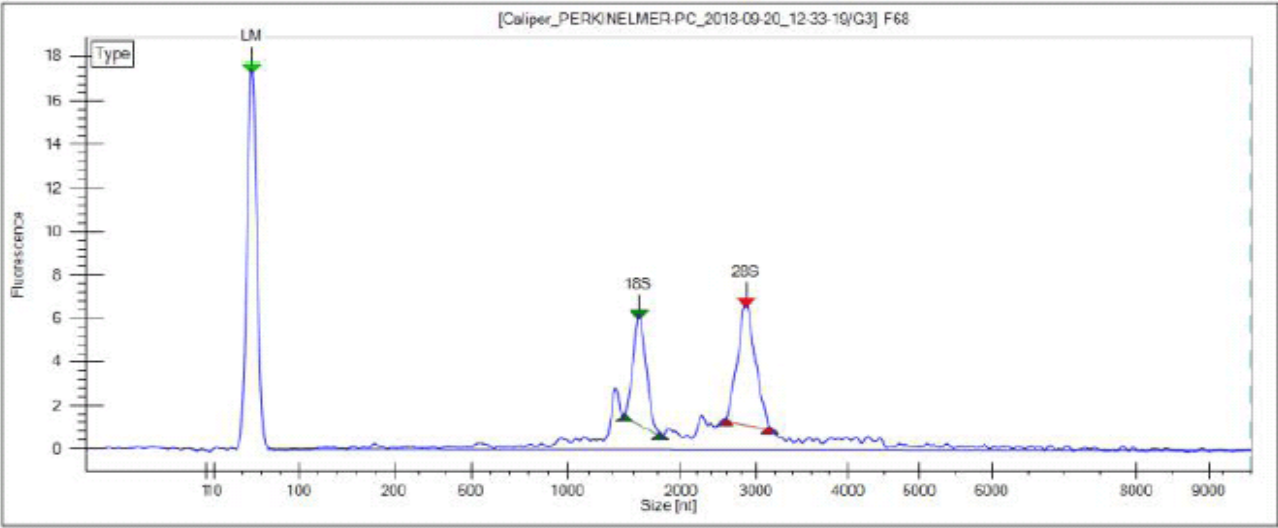

F69

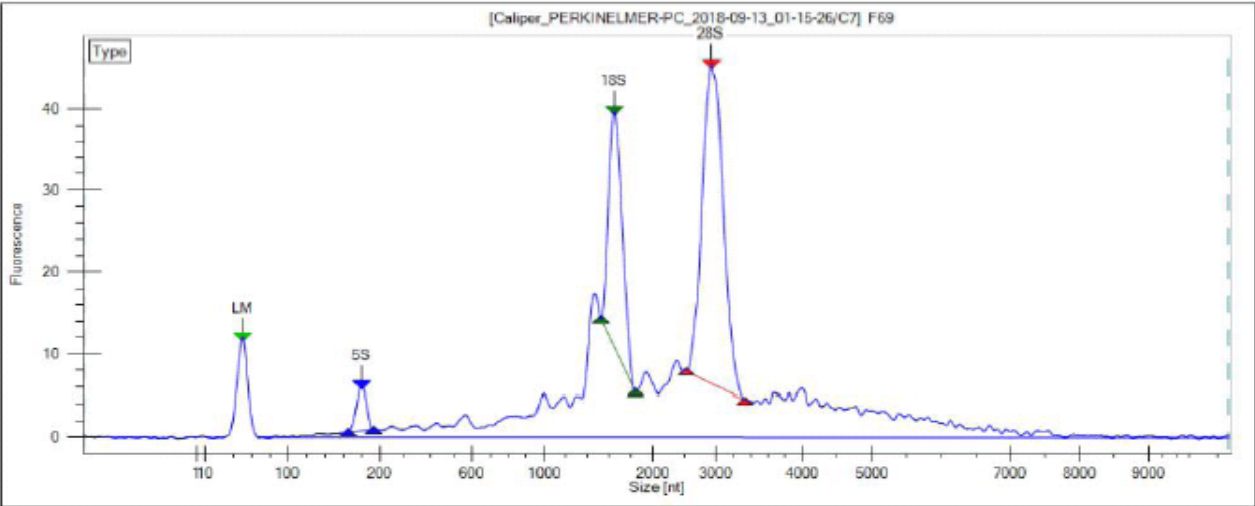

F70

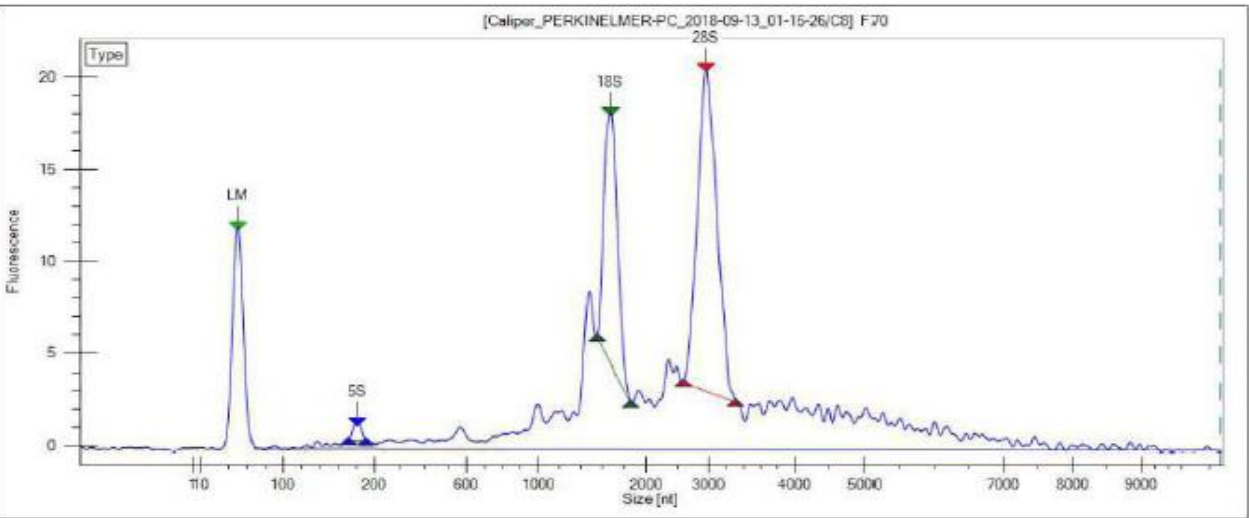



F71

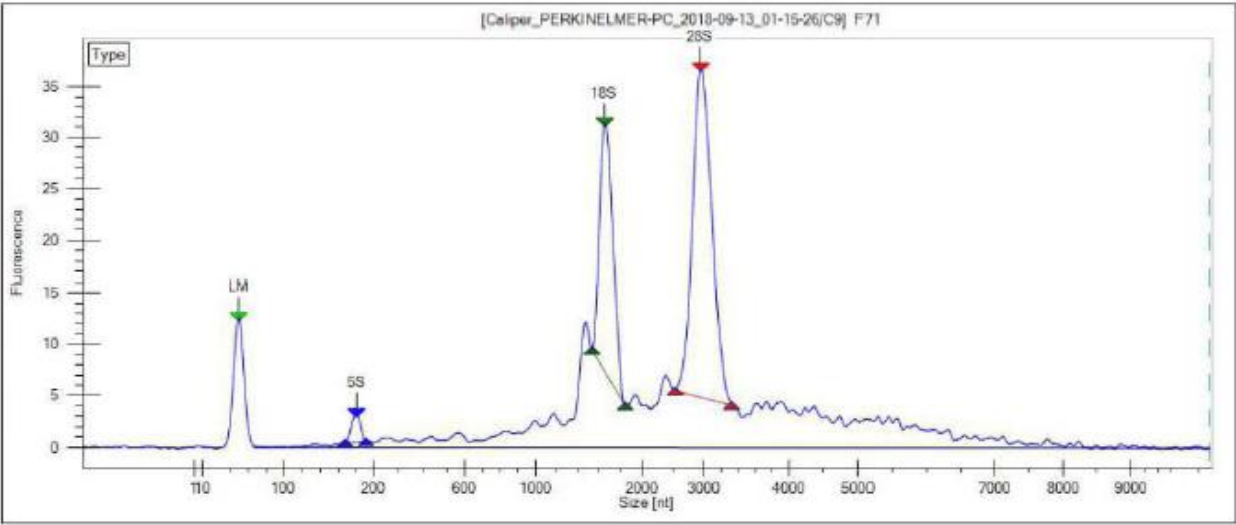

F72

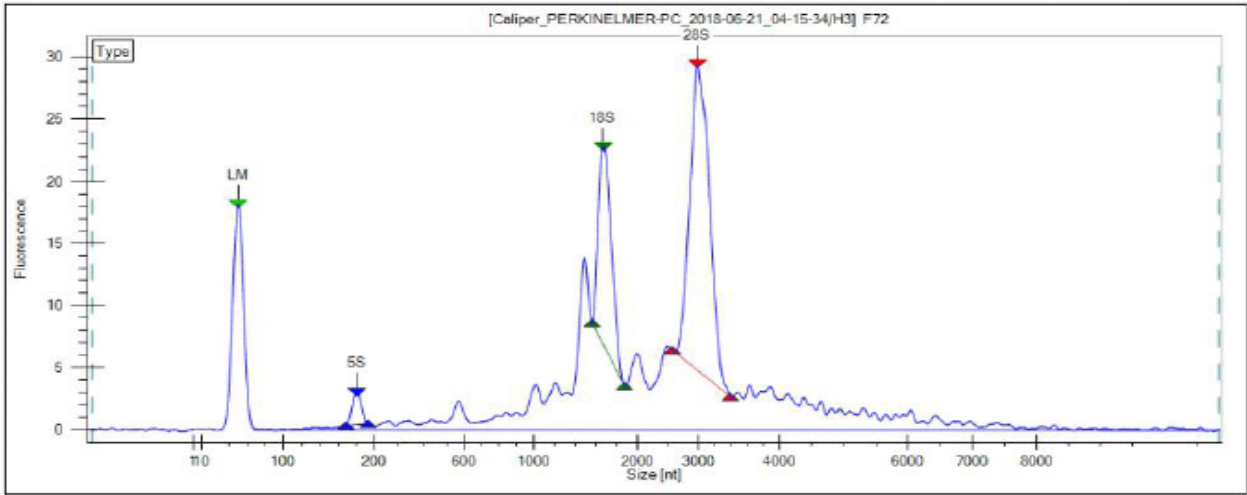

F73

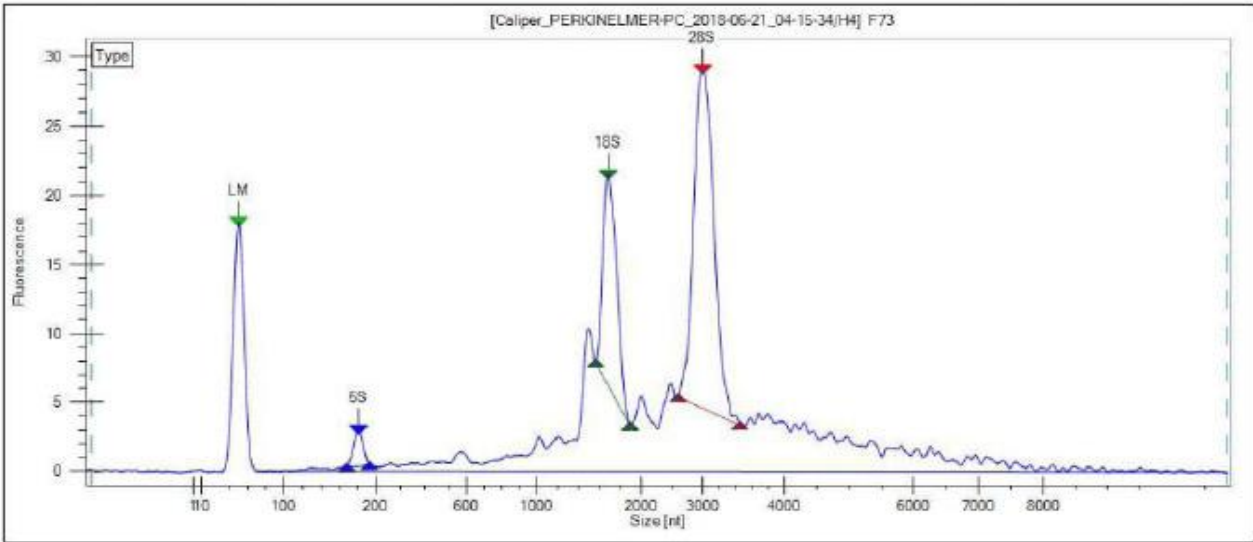

F74

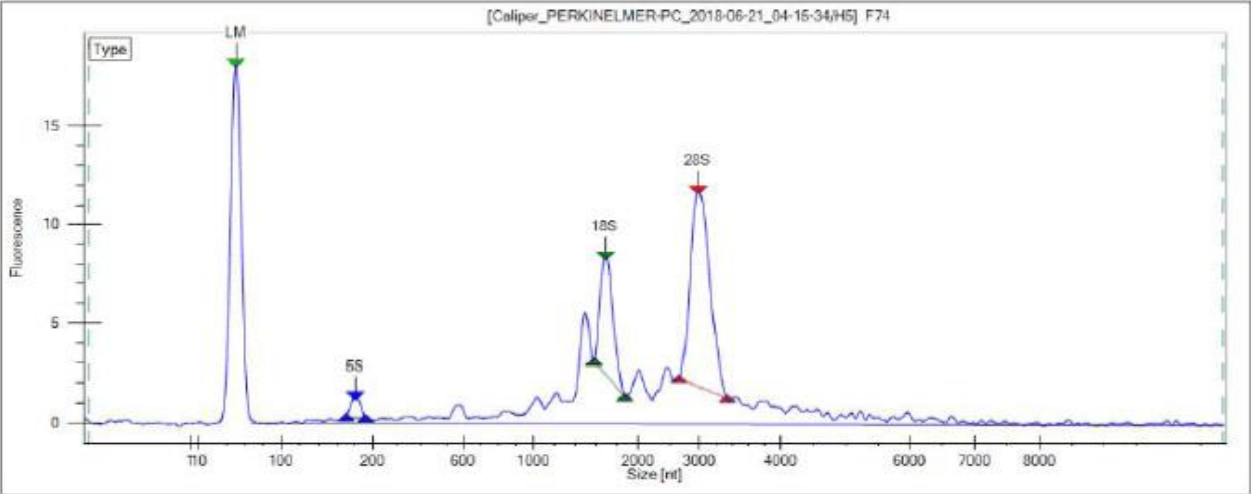

F75

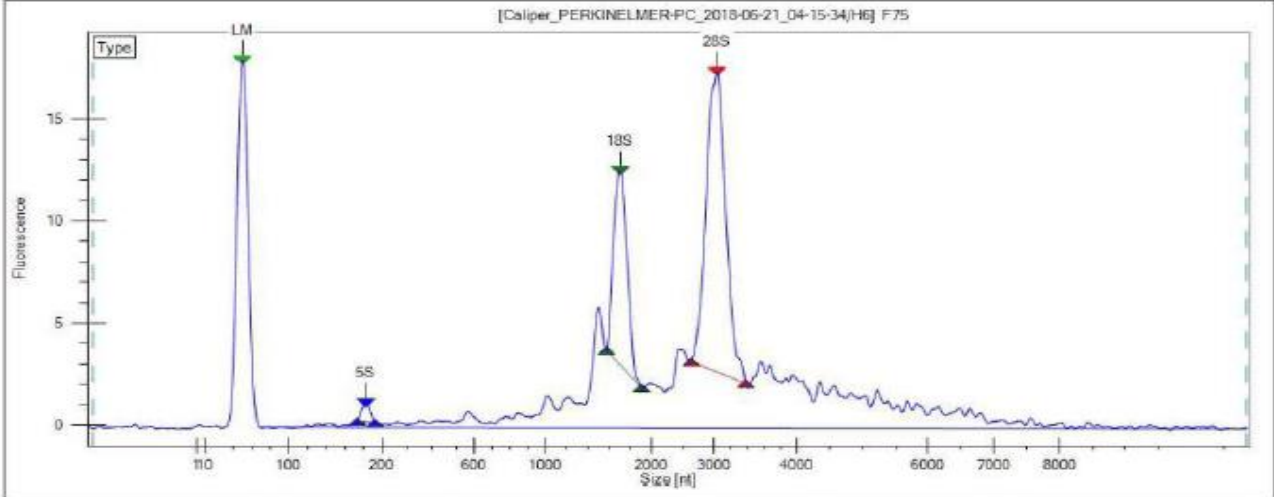

F77

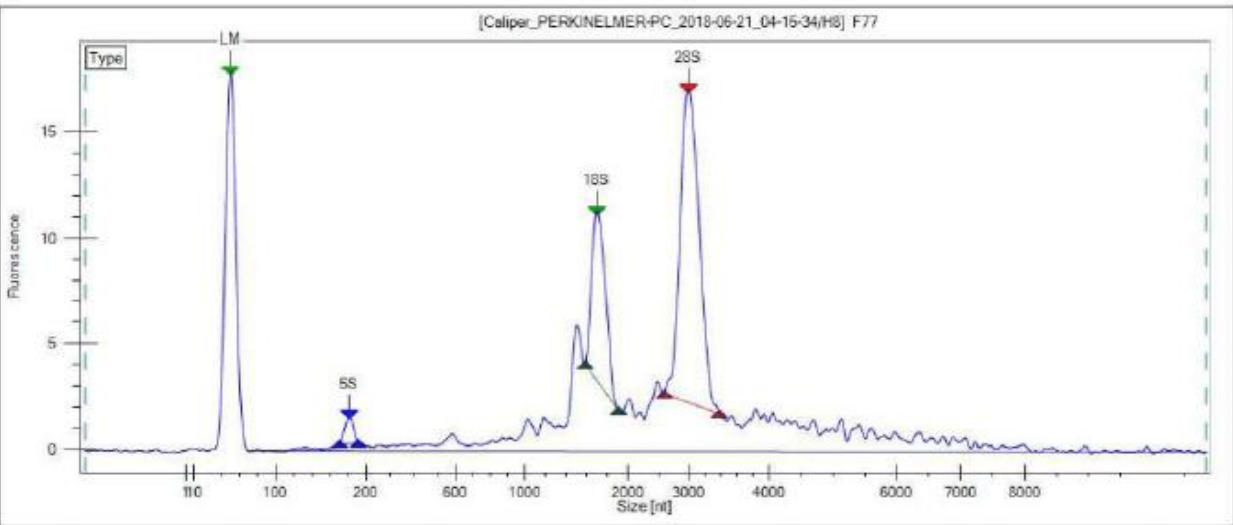

F78

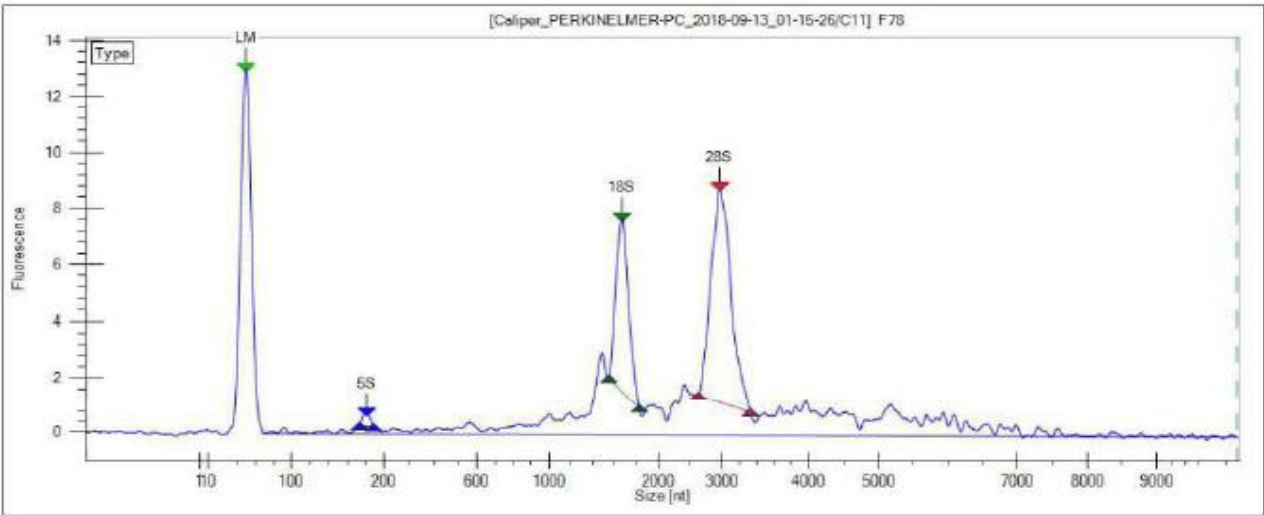

F79

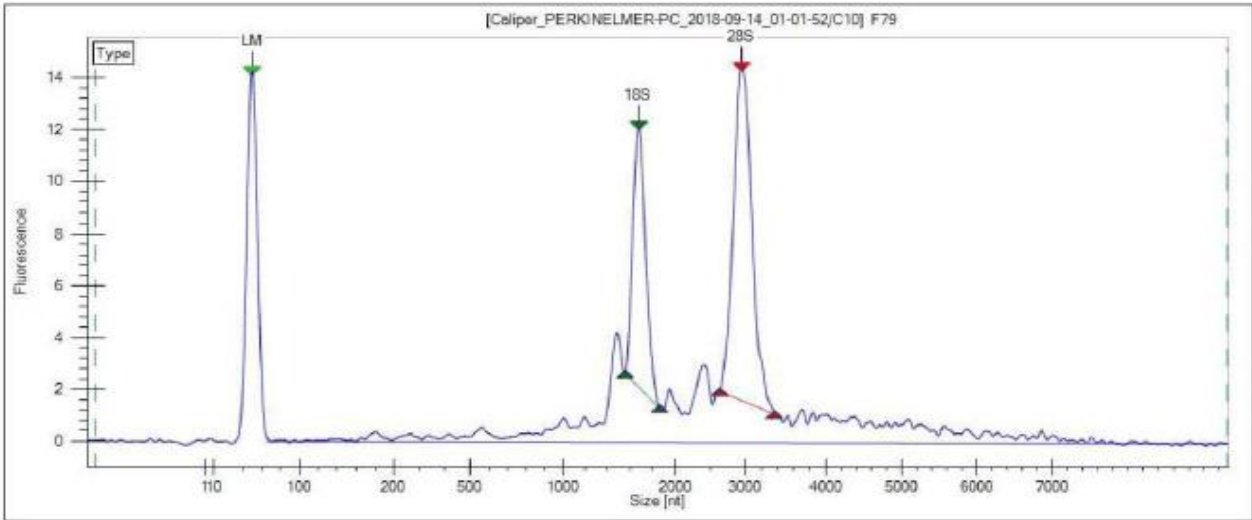

F80

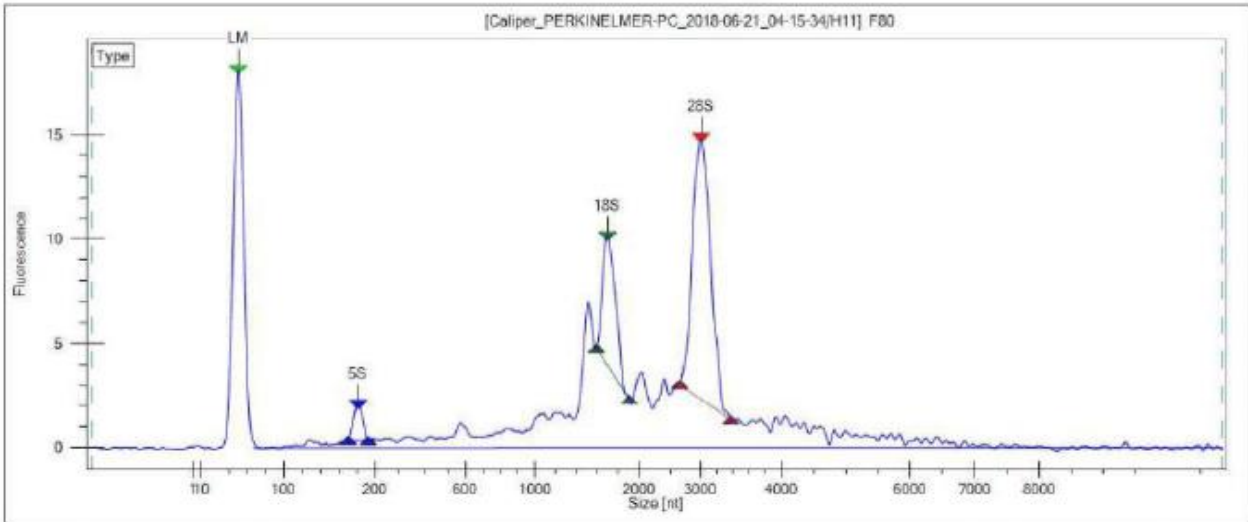

F81

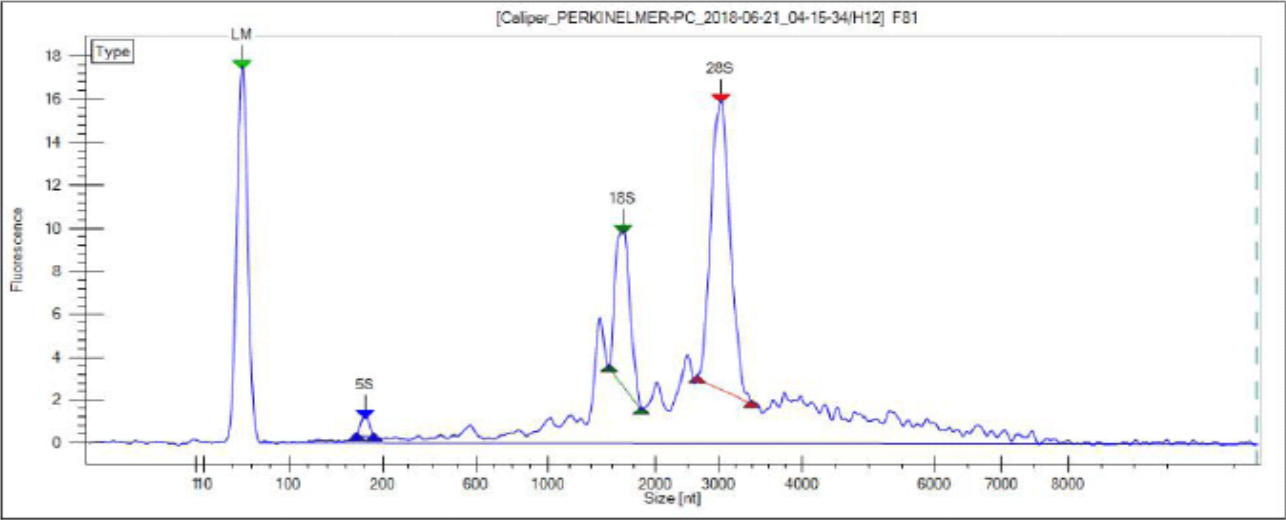

F82

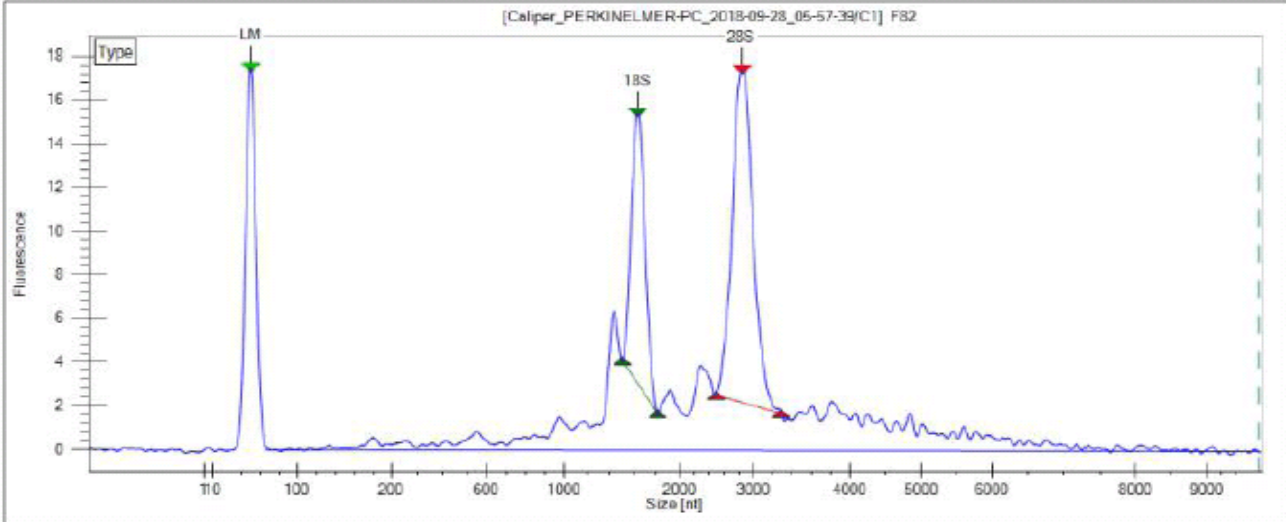

F83

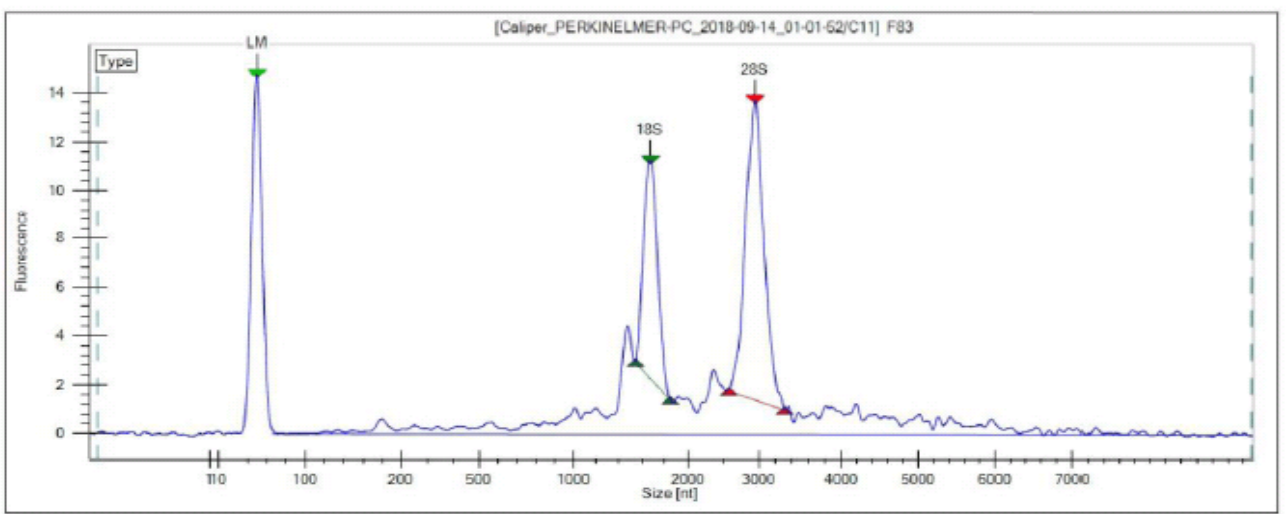

F84

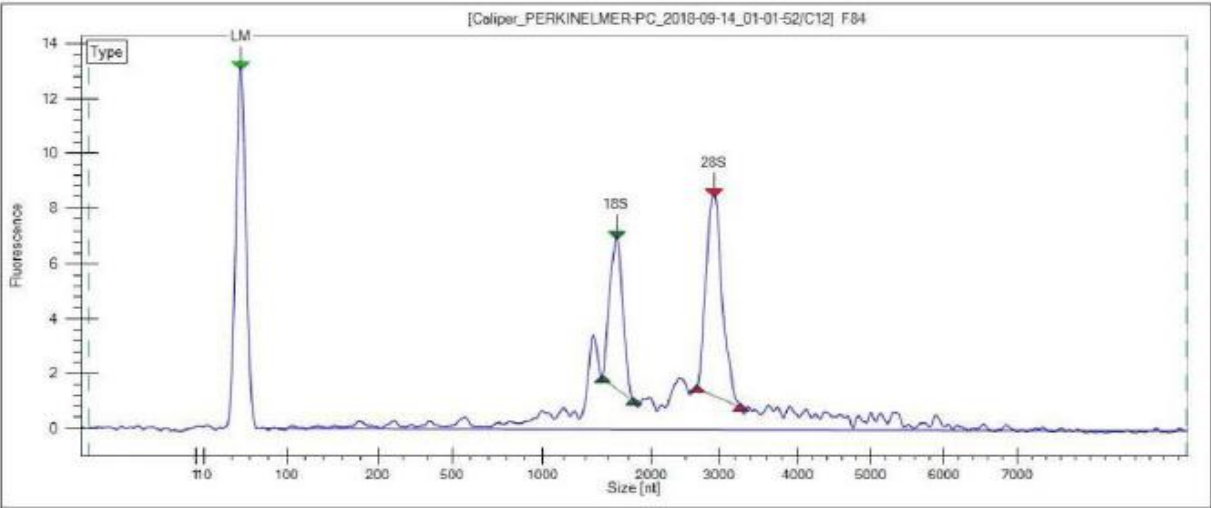

F85

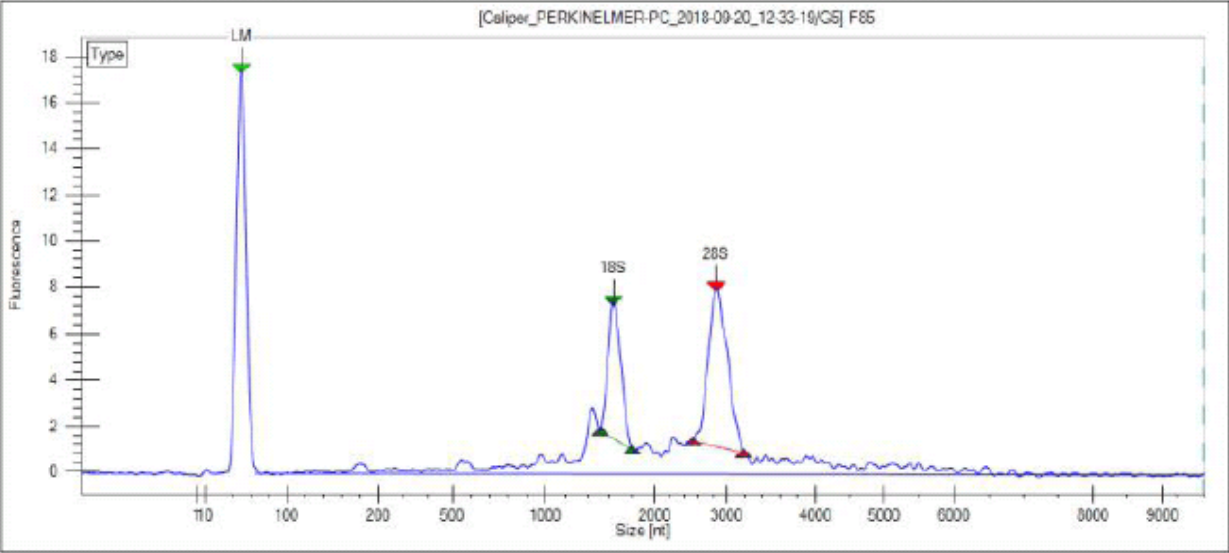

F86

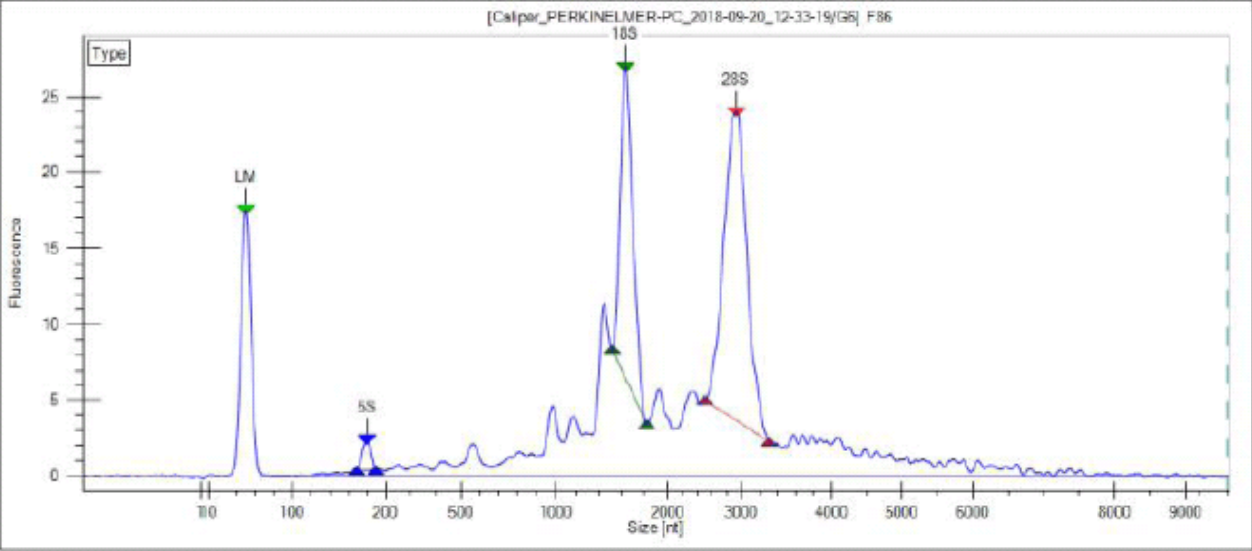



F87

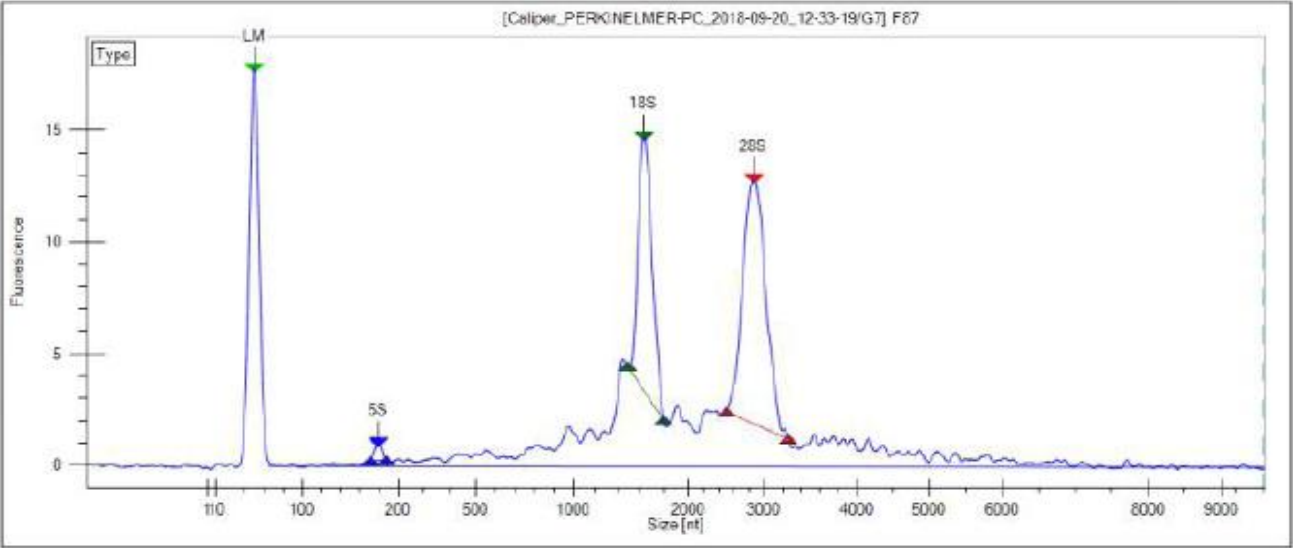

F88

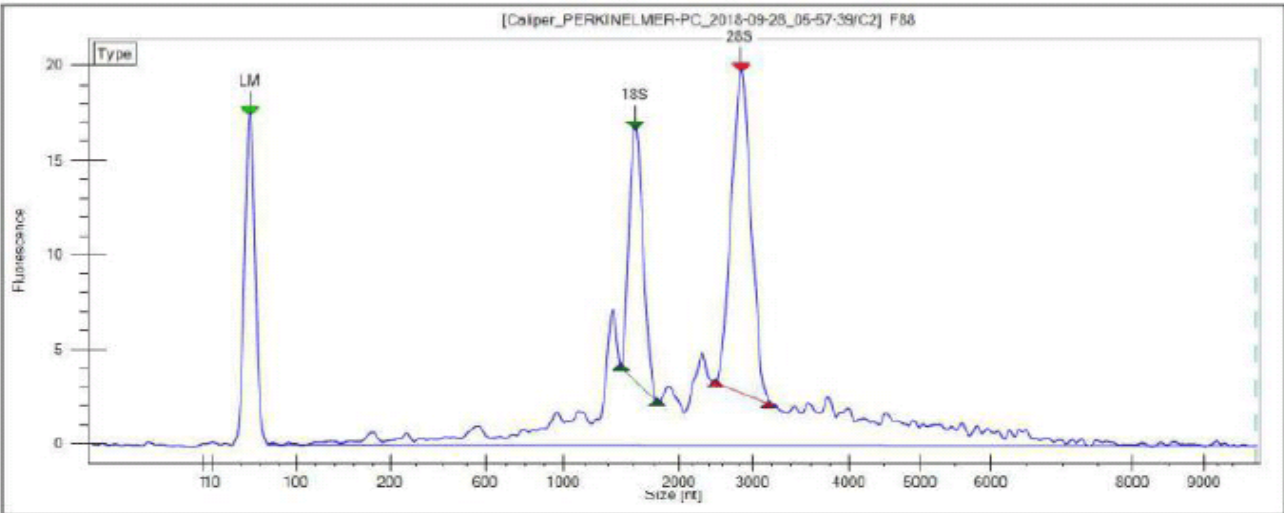

F89

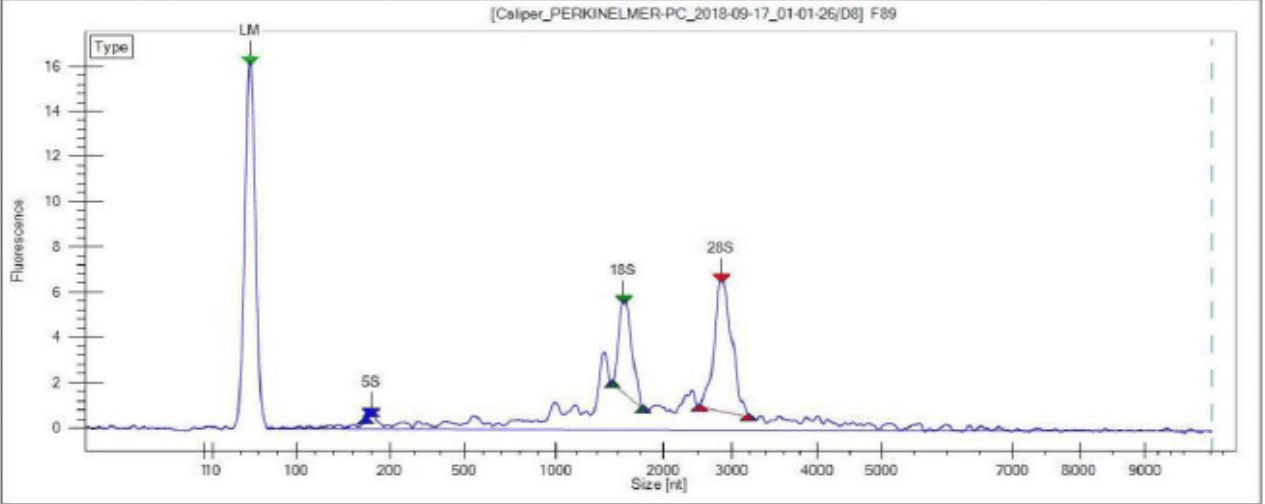



F90

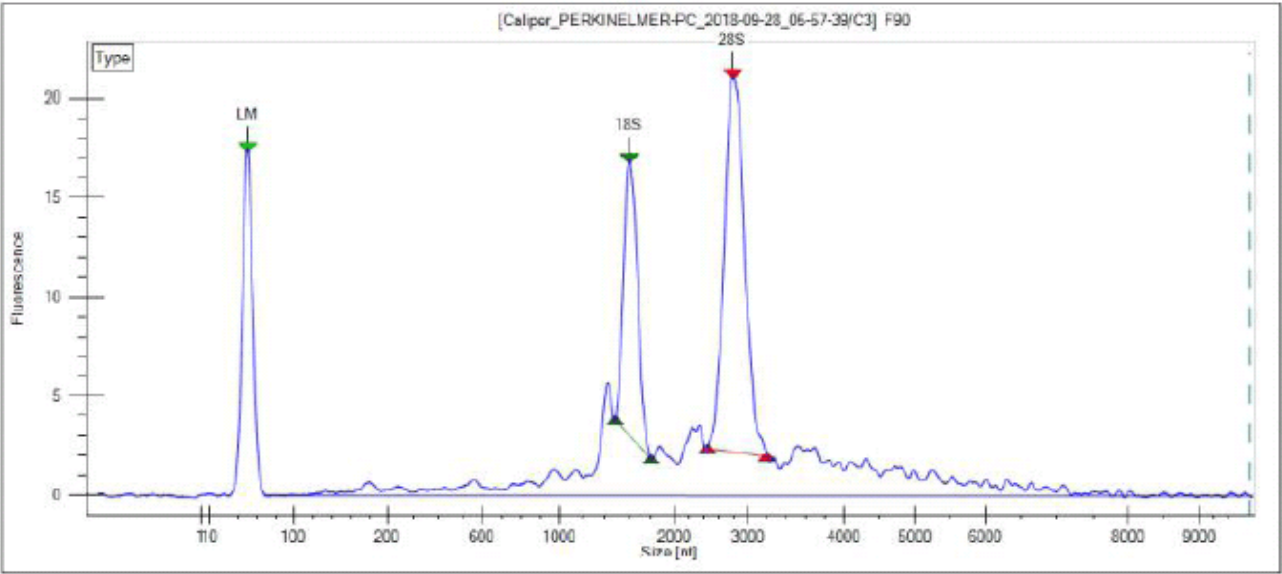

F91

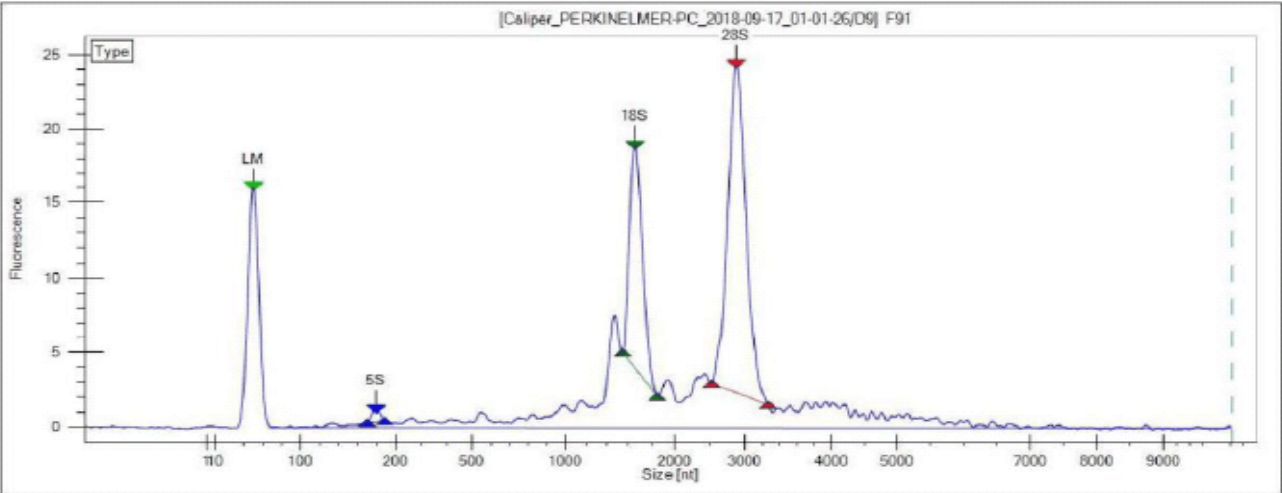

F92

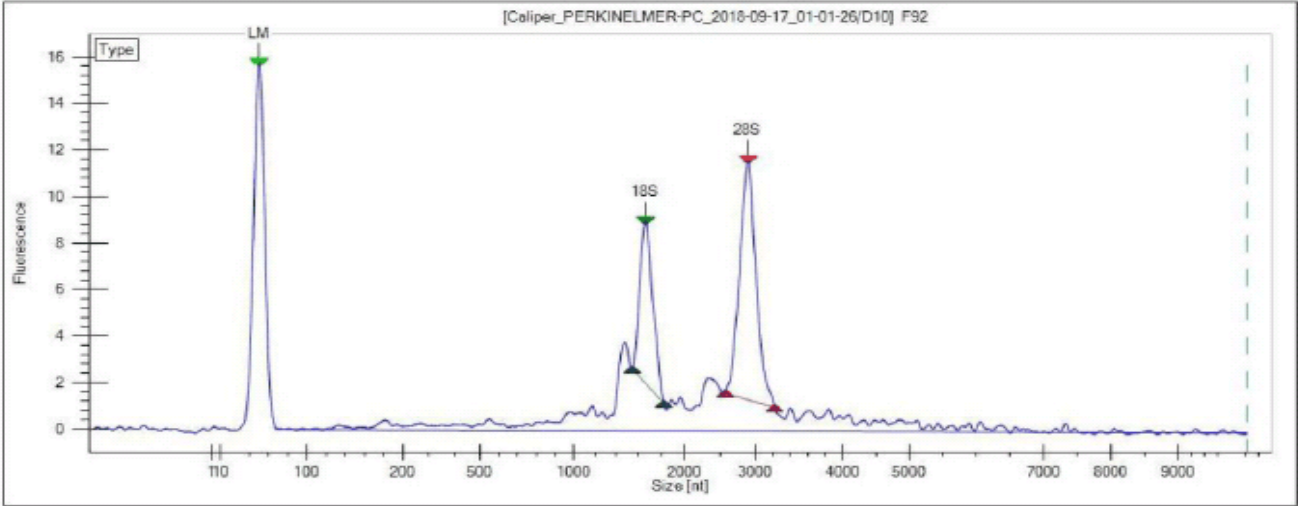

F93

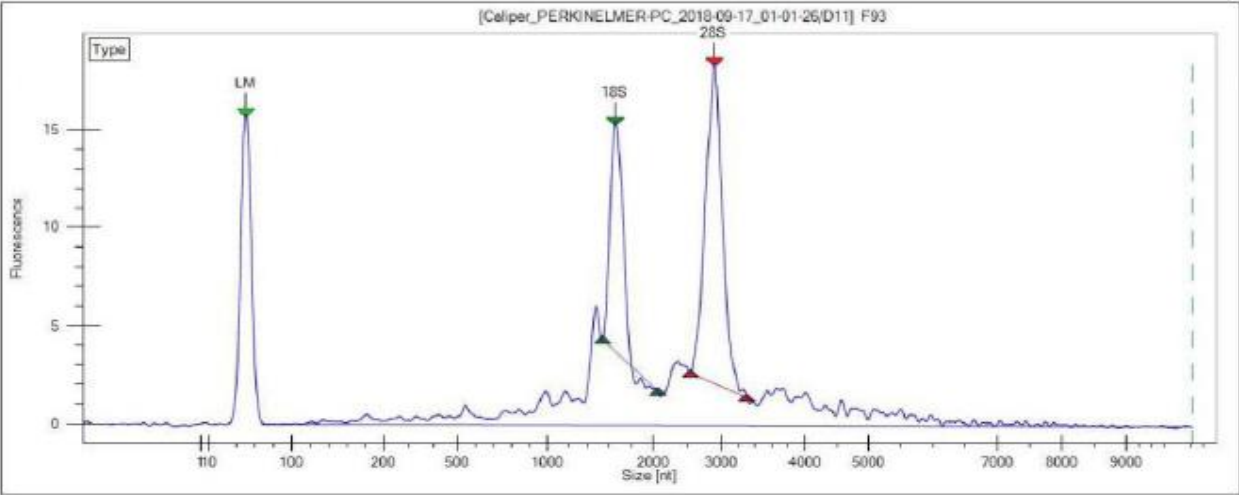

F94

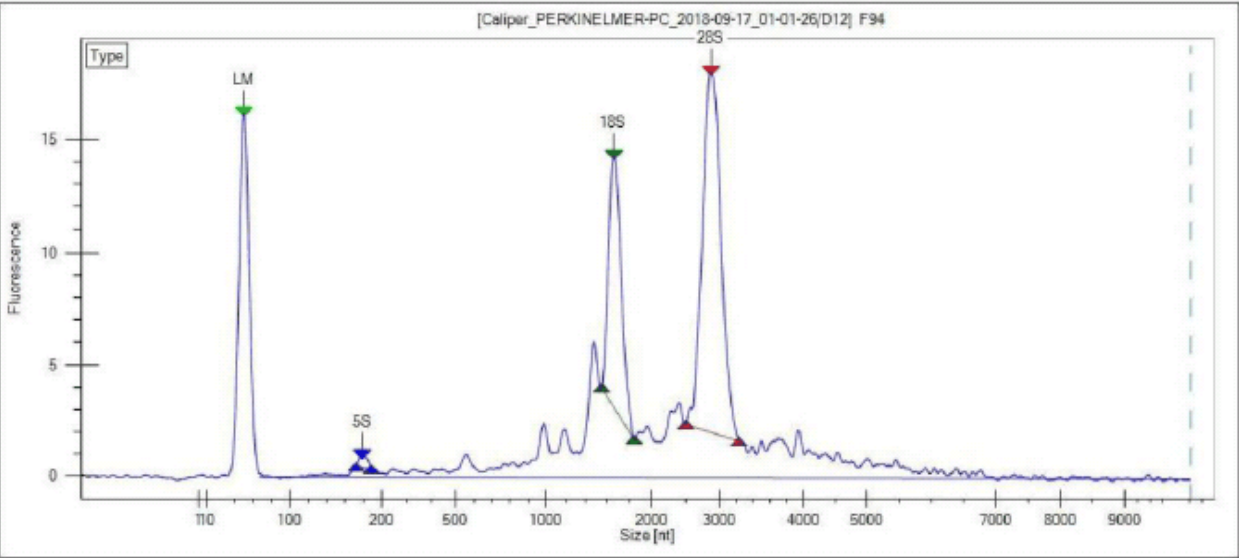

F95

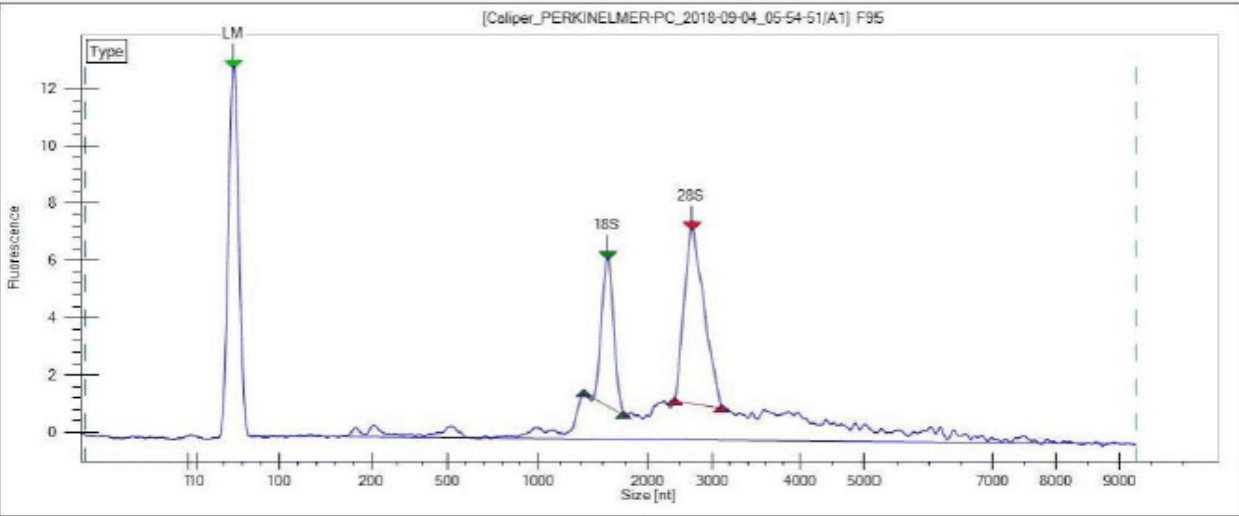

F96

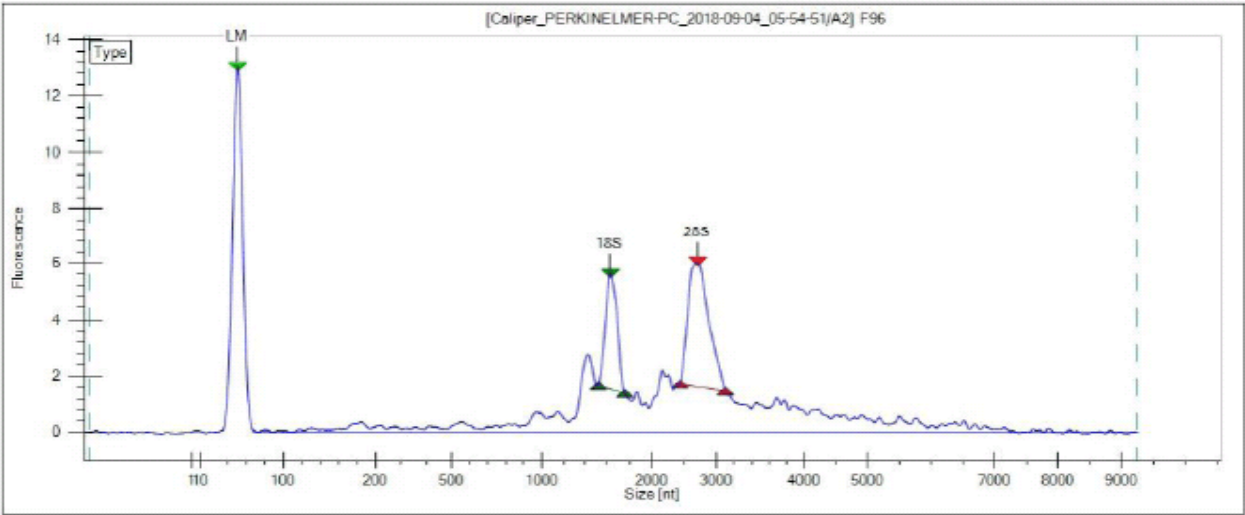

F97

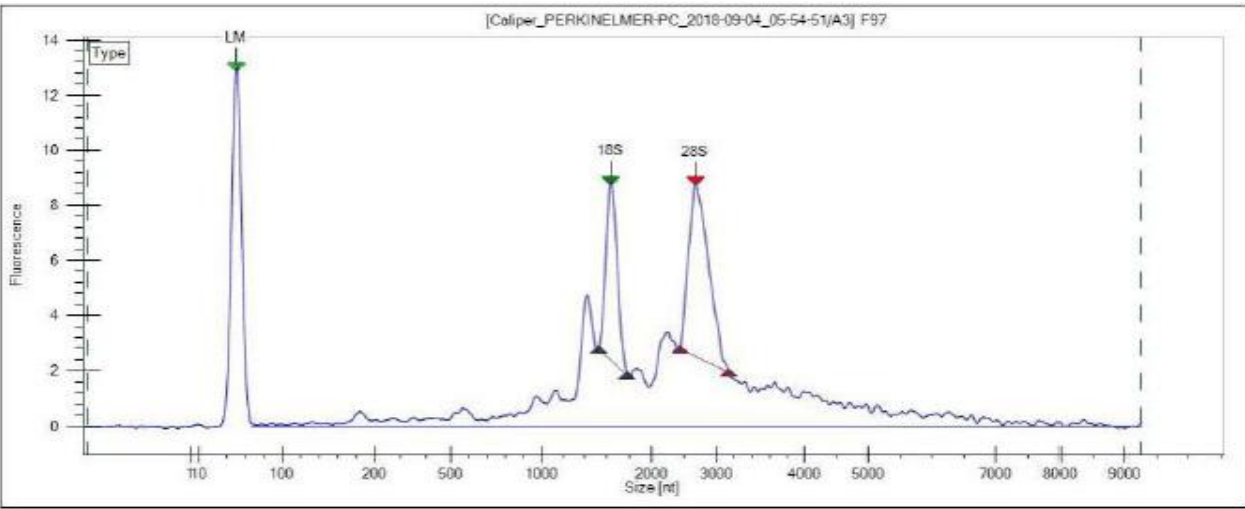

F98

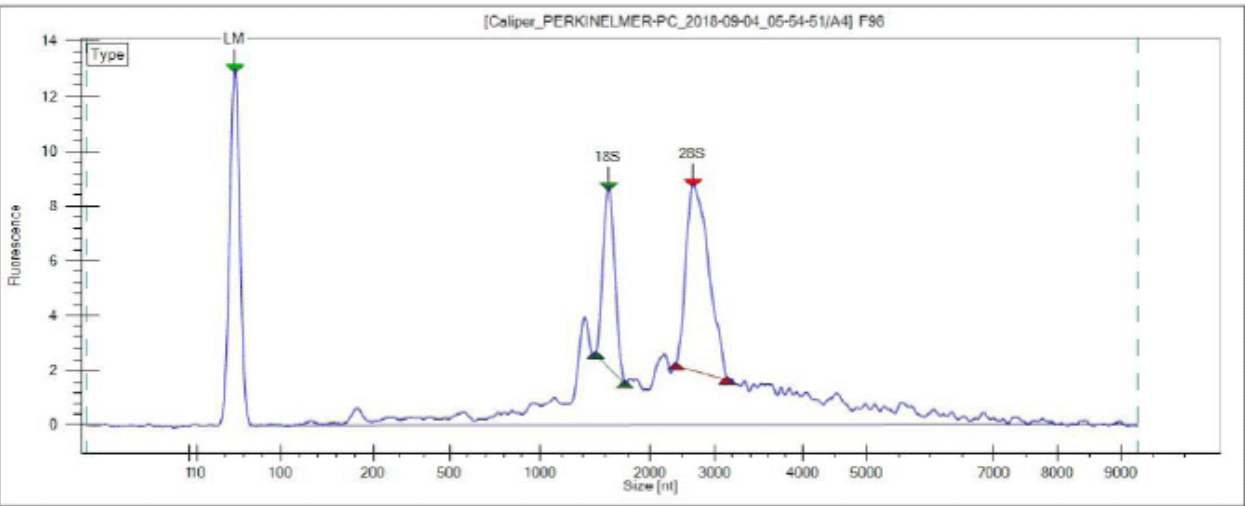

F99

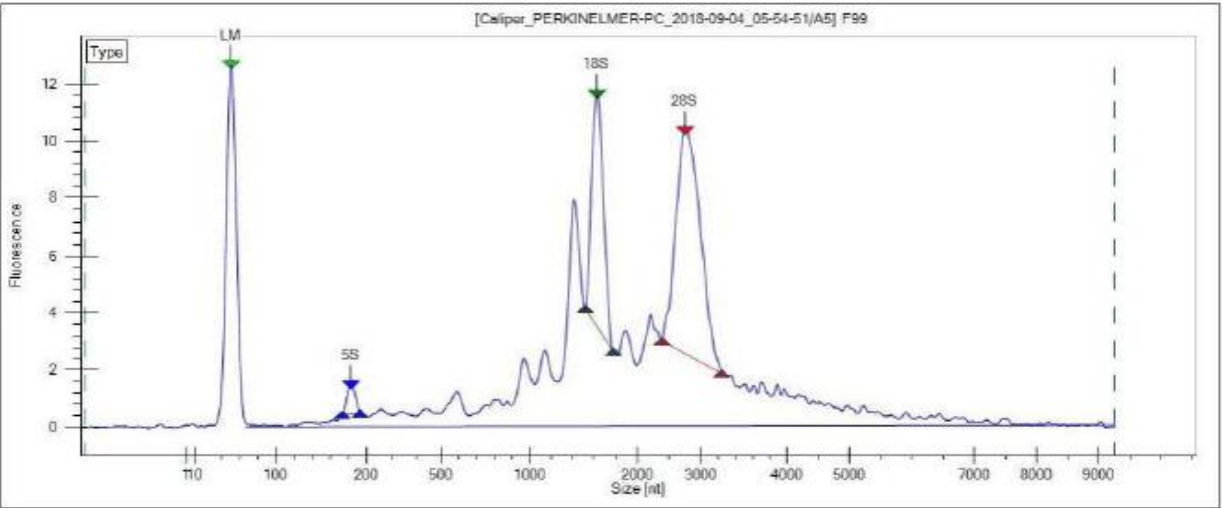

F100

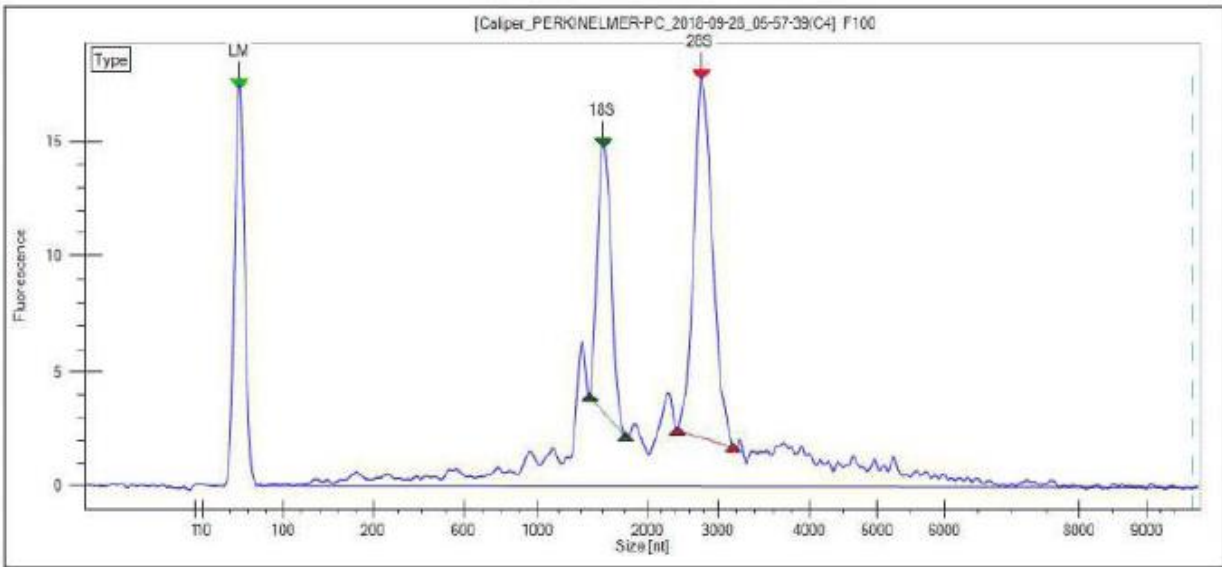

Supplement: s1 [file s1]
