# Supplementary material
Source: MDPI journal article supplement (https://www.mdpi.com/2311-7524/8/9/842)
Supplement: s1 [file s1]

**Table S3.** Statistical for sample RNA sequencing data evaluation.

| Sample name | BMK-ID | Read number | Base number    | % $\geq$ Q30 | GC Content |
|-------------|--------|-------------|----------------|--------------|------------|
| Pc -1       | T1008  | 78,041,589  | 19,416,354,630 | 92.24        | 47.07      |
| ph-2        | T1009  | 77,878,954  | 18,953,744,924 | 91.45        | 47.20      |
| F1          | T1010  | 16,736,192  | 4,998,747,018  | 92.01        | 47.37      |
| F8          | T1012  | 14,030,256  | 4,189,487,706  | 91.42        | 47.81      |
| F9          | T1013  | 15,609,787  | 4,666,490,680  | 91.75        | 48.03      |
| F11         | T1014  | 13,888,006  | 4,150,094,528  | 92.02        | 47.73      |
| F3          | T03    | 21,183,567  | 6,335,399,070  | 92.47        | 48.79      |
| F4          | T04    | 20,348,241  | 6,084,441,996  | 91.97        | 49.03      |
| F6          | T05    | 21,491,995  | 6,429,032,298  | 92.19        | 48.30      |
| F7          | T06    | 23,161,229  | 6,920,209,312  | 92.66        | 48.68      |
| F10         | T07    | 24,907,003  | 7,452,548,208  | 92.16        | 48.78      |
| F12         | T08    | 23,344,480  | 6,979,521,244  | 92.37        | 48.74      |
| F13         | T09    | 23,611,173  | 7,064,142,818  | 91.38        | 48.39      |
| F14         | T10    | 21,733,013  | 6,499,526,370  | 91.79        | 48.94      |
| F16         | T11    | 22,179,619  | 6,632,837,432  | 92.04        | 47.62      |
| F18         | T12    | 22,487,770  | 6,723,154,758  | 91.75        | 48.73      |
| F19         | T13    | 22,445,928  | 6,712,171,560  | 92.06        | 48.58      |
| F20         | T14    | 22,910,978  | 6,855,625,994  | 93.03        | 48.44      |
| F22         | T15    | 21,284,074  | 6,370,888,640  | 93.00        | 48.18      |
| F25         | T16    | 21,092,423  | 6,304,594,172  | 93.24        | 49.07      |
| F26         | T17    | 20,391,495  | 6,093,590,392  | 92.19        | 48.45      |
| F27         | T18    | 23,142,914  | 6,923,983,872  | 93.48        | 49.04      |
| F29         | T19    | 21,509,605  | 6,439,786,684  | 92.87        | 49.08      |
| F31         | T20    | 21,472,705  | 6,424,596,632  | 92.23        | 46.59      |
| F32         | T21    | 22,177,834  | 6,638,690,112  | 92.85        | 47.87      |
| F33         | T22    | 21,988,253  | 6,582,438,610  | 92.71        | 47.68      |
| F38         | T23    | 21,348,172  | 6,376,542,888  | 92.51        | 48.75      |
| F41         | T24    | 20,368,201  | 6,092,582,276  | 92.15        | 48.50      |
| F42         | T25    | 21,602,367  | 6,464,264,194  | 91.94        | 47.88      |
| F44         | T26    | 22,910,607  | 6,861,878,188  | 92.64        | 49.12      |
| F45         | T27    | 22,016,323  | 6,593,583,968  | 92.89        | 47.31      |
| F50         | T28    | 24,084,870  | 7,209,051,456  | 93.28        | 48.31      |
| F51         | T29    | 24,261,542  | 7,261,676,216  | 93.70        | 48.72      |

|     |     |            |               |       |       |
|-----|-----|------------|---------------|-------|-------|
| F52 | T30 | 21,389,306 | 6,401,873,968 | 93.92 | 48.91 |
| F55 | T31 | 24,367,647 | 7,281,400,354 | 93.86 | 48.52 |
| F61 | T32 | 25,722,086 | 7,691,950,146 | 93.85 | 48.72 |
| F62 | T33 | 23,269,897 | 6,959,705,048 | 93.70 | 48.15 |
| F67 | T34 | 21,858,467 | 6,535,350,908 | 94.27 | 48.22 |
| F72 | T35 | 20,912,594 | 6,248,801,446 | 94.10 | 48.39 |
| F73 | T36 | 21,715,207 | 6,494,602,812 | 93.98 | 48.14 |
| F74 | T37 | 21,579,412 | 6,444,920,038 | 94.02 | 48.24 |
| F75 | T38 | 22,096,650 | 6,598,348,254 | 94.29 | 48.52 |
| F77 | T39 | 22,091,923 | 6,596,487,698 | 94.38 | 47.92 |
| F80 | T40 | 21,604,276 | 6,461,975,786 | 94.18 | 47.95 |
| F81 | T41 | 21,229,857 | 6,343,989,816 | 93.99 | 48.16 |
| F5  | T42 | 26,835,332 | 8,021,039,384 | 94.82 | 50.57 |
| F15 | T45 | 23,360,115 | 6,959,832,822 | 94.98 | 49.76 |
| F17 | T46 | 27,237,409 | 8,128,447,496 | 94.75 | 49.20 |
| F21 | T47 | 27,166,750 | 8,100,831,724 | 94.49 | 49.56 |
| F23 | T48 | 25,482,559 | 7,601,941,618 | 94.82 | 49.75 |
| F24 | T49 | 22,596,518 | 6,750,129,682 | 94.35 | 49.18 |
| F34 | T50 | 27,107,973 | 8,101,843,566 | 94.73 | 49.01 |
| F36 | T51 | 30,529,307 | 9,118,424,348 | 94.57 | 49.18 |
| F37 | T52 | 30,196,989 | 9,034,821,494 | 93.72 | 50.14 |
| F39 | T53 | 23,319,026 | 6,969,581,344 | 94.79 | 50.64 |
| F40 | T54 | 25,594,292 | 7,635,004,290 | 94.62 | 50.31 |
| F46 | T55 | 27,925,985 | 8,332,396,158 | 94.33 | 50.43 |
| F47 | T56 | 31,977,247 | 9,544,630,788 | 94.13 | 49.65 |
| F48 | T57 | 27,328,135 | 8,150,538,384 | 93.90 | 50.08 |
| F49 | T58 | 27,269,428 | 8,141,952,286 | 94.79 | 49.96 |
| F54 | T59 | 31,328,309 | 9,357,003,882 | 94.88 | 50.62 |
| F56 | T60 | 32,270,463 | 9,634,612,866 | 94.13 | 49.96 |
| F57 | T61 | 24,883,678 | 7,434,438,602 | 94.88 | 50.64 |
| F58 | T62 | 27,806,360 | 8,280,122,488 | 94.74 | 50.20 |
| F63 | T63 | 29,375,460 | 8,783,851,928 | 94.17 | 49.42 |
| F64 | T64 | 27,845,300 | 8,302,021,696 | 94.53 | 49.62 |
| F65 | T65 | 26,490,820 | 7,902,398,062 | 94.60 | 50.03 |
| F66 | T66 | 20,679,129 | 6,169,120,106 | 95.01 | 50.38 |
| F69 | T67 | 21,600,078 | 6,452,267,188 | 95.30 | 49.78 |

|      |     |            |                |       |       |
|------|-----|------------|----------------|-------|-------|
| F70  | T68 | 20,924,601 | 6,247,929,324  | 94.86 | 49.70 |
| F71  | T69 | 26,902,393 | 8,024,519,516  | 94.75 | 50.21 |
| F79  | T70 | 27,860,905 | 8,315,734,666  | 94.71 | 50.59 |
| F83  | T71 | 26,654,447 | 7,963,450,978  | 94.68 | 49.36 |
| F84  | T72 | 22,266,511 | 6,635,727,642  | 93.63 | 50.27 |
| F89  | T73 | 27,651,264 | 8,235,107,236  | 94.47 | 50.19 |
| F91  | T74 | 29,415,202 | 8,784,912,302  | 94.48 | 50.14 |
| F92  | T75 | 31,169,916 | 9,299,016,400  | 94.15 | 50.92 |
| F93  | T76 | 27,666,818 | 8,260,878,902  | 94.15 | 50.19 |
| F94  | T77 | 26,610,482 | 7,927,862,962  | 94.19 | 50.23 |
| F95  | T78 | 30,385,646 | 9,054,916,360  | 94.11 | 50.27 |
| F96  | T79 | 25,696,287 | 7,654,990,880  | 93.81 | 50.38 |
| F97  | T80 | 27,859,027 | 8,302,523,164  | 94.34 | 51.01 |
| F98  | T81 | 24,316,830 | 7,251,453,870  | 94.37 | 51.40 |
| F99  | T82 | 28,778,018 | 8,604,551,040  | 95.26 | 50.11 |
| F28  | T83 | 29,922,268 | 8,914,684,812  | 94.93 | 48.43 |
| F30  | T84 | 27,023,573 | 8,071,413,704  | 94.71 | 49.02 |
| F35  | T85 | 28,846,637 | 8,625,426,972  | 94.54 | 49.19 |
| F43  | T86 | 30,532,481 | 9,121,021,466  | 94.76 | 49.10 |
| F68  | T87 | 30,603,689 | 9,146,820,000  | 94.66 | 49.77 |
| F78  | T88 | 27,368,250 | 8,167,610,068  | 94.58 | 49.06 |
| F82  | T89 | 29,082,189 | 8,635,306,412  | 94.89 | 49.15 |
| F85  | T90 | 33,042,623 | 9,874,252,120  | 94.76 | 48.80 |
| F86  | T91 | 35,107,283 | 10,468,432,530 | 94.07 | 48.75 |
| F87  | T92 | 30,885,160 | 9,232,114,160  | 94.64 | 48.79 |
| F88  | T93 | 30,731,625 | 9,175,835,314  | 94.87 | 48.71 |
| F90  | T94 | 35,034,996 | 10,454,966,712 | 94.79 | 48.72 |
| F100 | T95 | 21,621,708 | 6,458,534,986  | 94.66 | 49.37 |

Note: Sample name, sample information for single sample name; BMK-ID, the uniform of RNA sequencing number of the tested sample; Read number, pair-end reads in clean data; Base number, the total base number in clean data; %  $\geq$  Q30, percentage of bases in clean data quality values greater than or equal to 30; GC Content, GC content in clean data, which is G and C in clean data as a percentage of total base.
