# Supplementary material
Source: MDPI journal article supplement (https://www.mdpi.com/2311-7524/8/9/842)
Supplement: s1 [file s1]

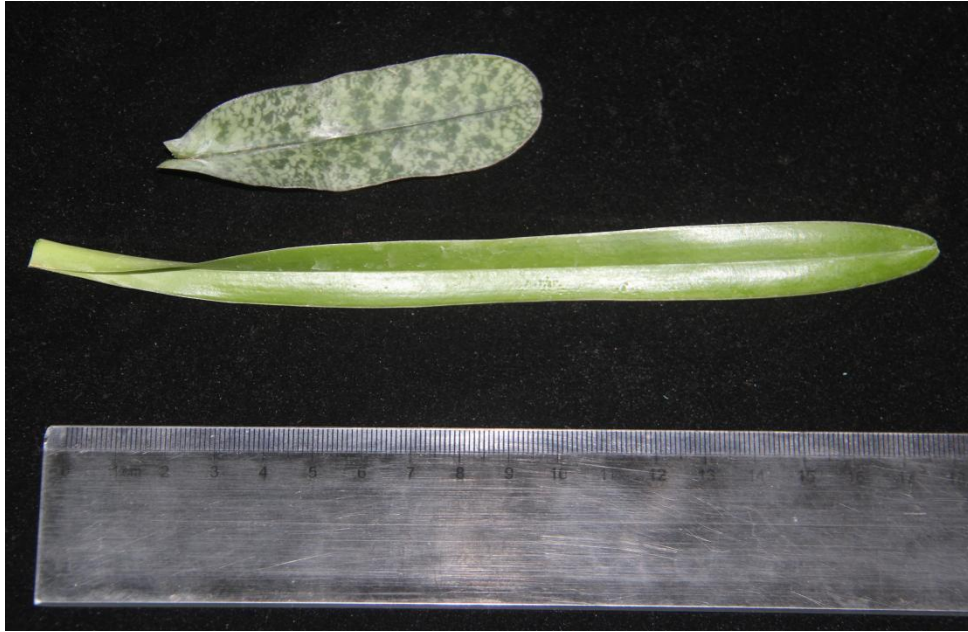

**Figure S1.** Comparison of second leaf morphologies from top between *P. concolor* (up) and *P. hirsutissimum* (down).
