# Supplementary material
Source: MDPI journal article supplement (https://www.mdpi.com/2311-7524/8/9/842)
Supplement: s1 [file s1]

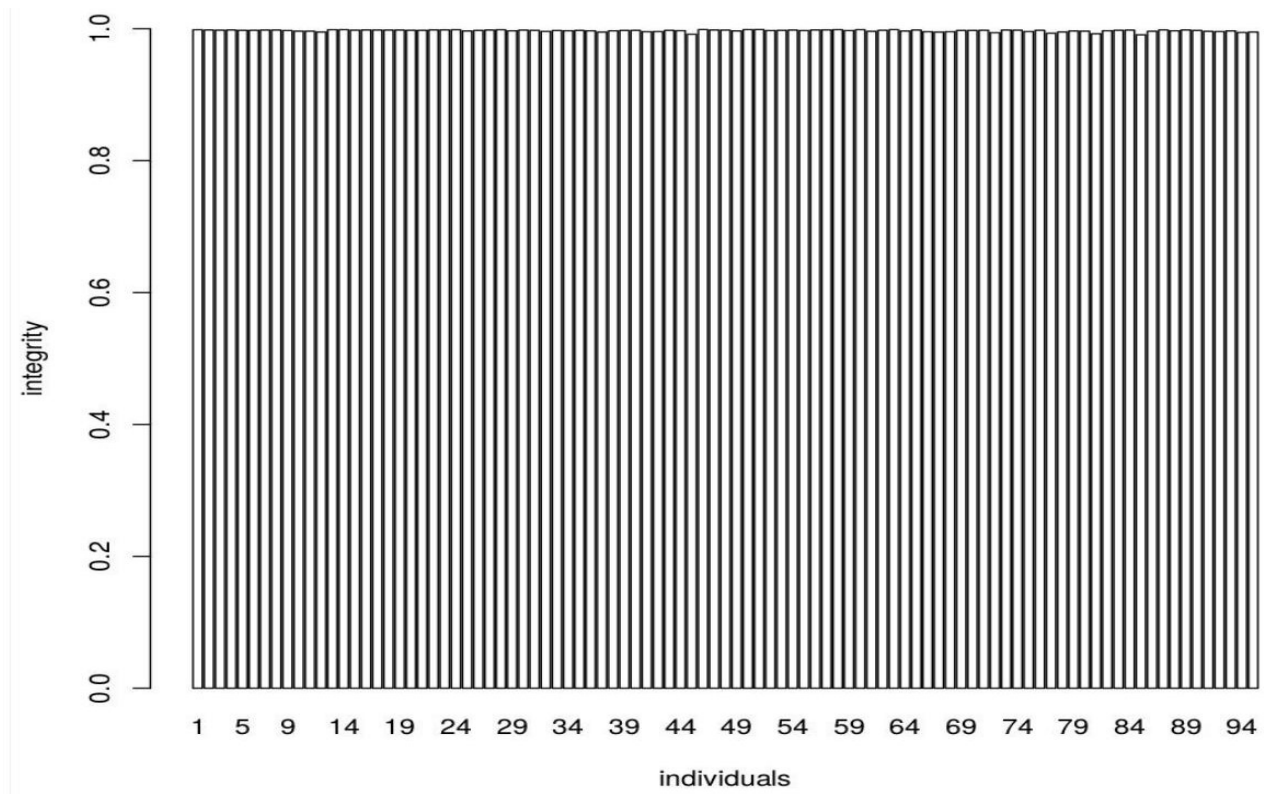

**Figure S4.** Distribution of marker integrity on each individual in F1 mapping population. The x-axis indicates each of F1 individuals, and the y-axis indicates integrity of mapping markers in each individual in the F1 mapping population.
