# Supplementary material
Source: MDPI journal article supplement (https://www.mdpi.com/2311-7524/8/9/842)

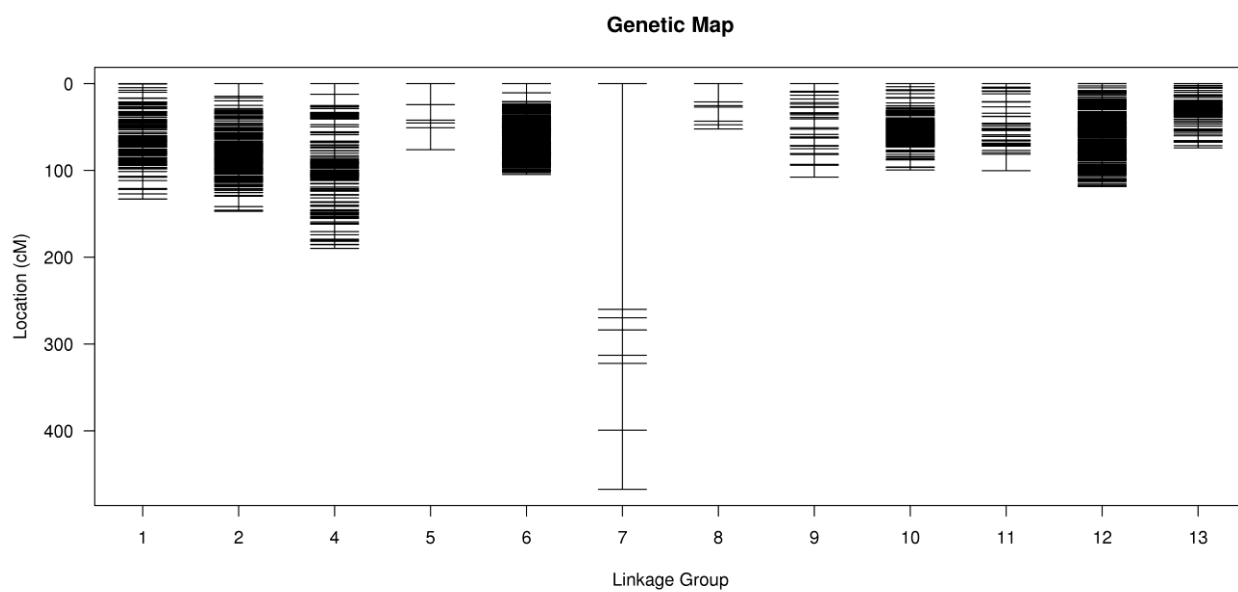

**Figure S3.** Distribution of SNP markers on the 13 linkage groups of male parent *P. hirsutissimum*.

Supplement: s1 [file s1]

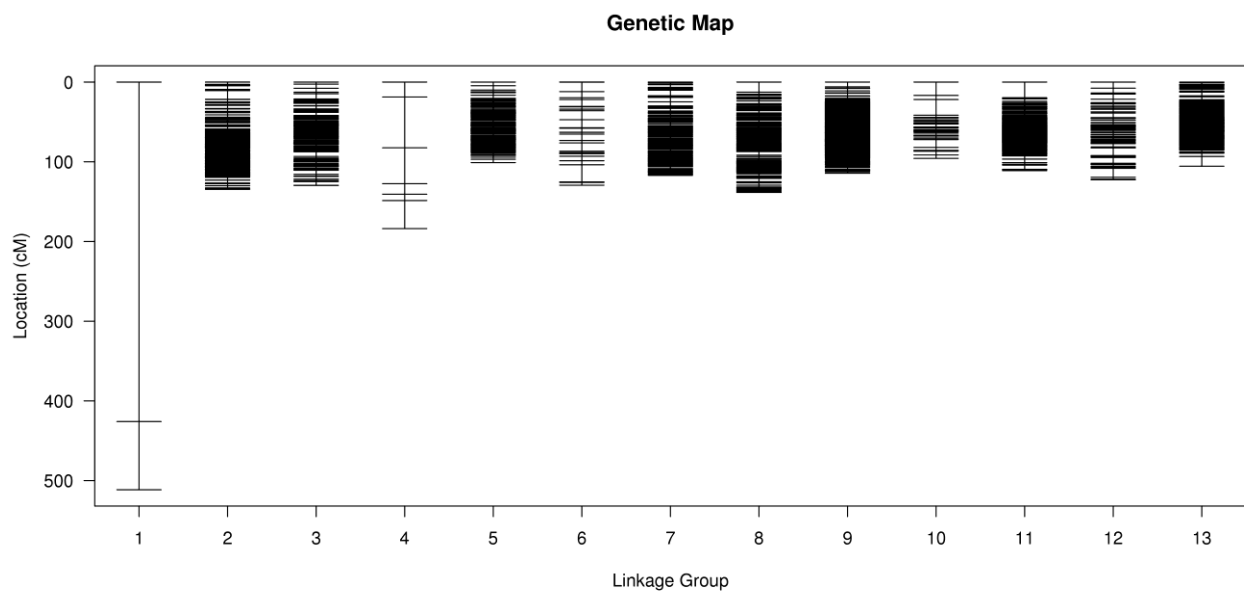

**Figure S2.** Distribution of SNP markers on the 13 linkage groups of female parent *P. concolor*.

Supplement: s1 [file s1]
